# Supplementary material for: Identification of a two-layer regulatory network of proliferation-related microRNAs in hepatoma cells
Source: PubMed Central journal article supplement — Nucleic Acids Res. 2012 Aug 24;40(20):10478–93. doi: 10.1093/nar/gks789 (PMC3488236; doi:10.1093/nar/gks789), 2012-08-24
Supplement: supp_gks789_nar-02597-c-2011-File013.pdf [file supp_gks789_nar-02597-c-2011-File013.pdf]

**Supplementary figure S1. The expression level of miR-101 determined using a stem-loop qRT-PCR assay in miR-101 over-expressing HepG2 cells. MiRNA expression levels were expressed as 39 – Ct. miR-16 and miR-93 were used as internal control miRNAs. The results are mean  $\pm$  s.d. of two independent experiments. (\*\*\*) P-value < 0.001)**

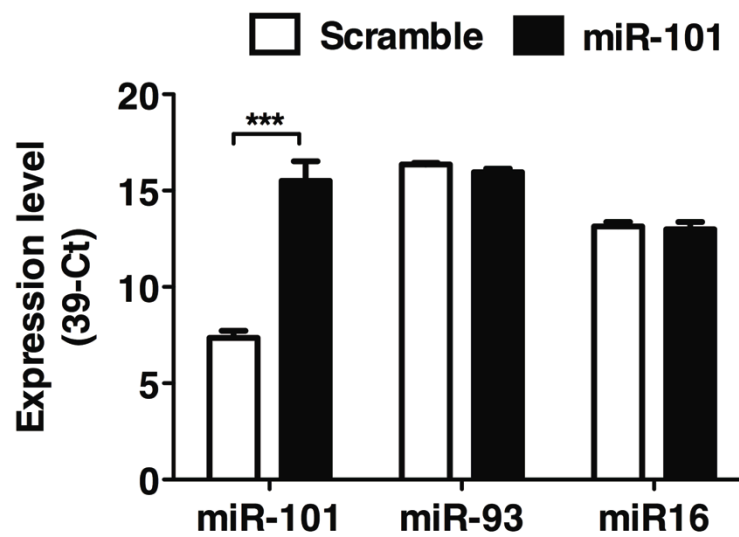

**Supplementary Figure S2. Genome structure of cloned FOS 3'-UTR region and TGFB1 promoter region.** (A) Gray and black boxes indicate the gene body of FOS and hsa-miR-101 putative binding site, respectively. Full length (810 bp) of FOS 3'-UTR was cloned. The nucleotide highlighted with red color indicates the seed region of hsa-miR-101. (B) Black and gray boxes respectively indicate the promoter region and gene body of TGFB1. Upstream 1,000 bp from TSS (transcriptional start site) the full length of 5'UTR (882 bp) of TGFB1 gene was cloned. (C) The TGFB1 promoter can be activated (1.54-fold changes) by TPA treatment in HepG2 cells.

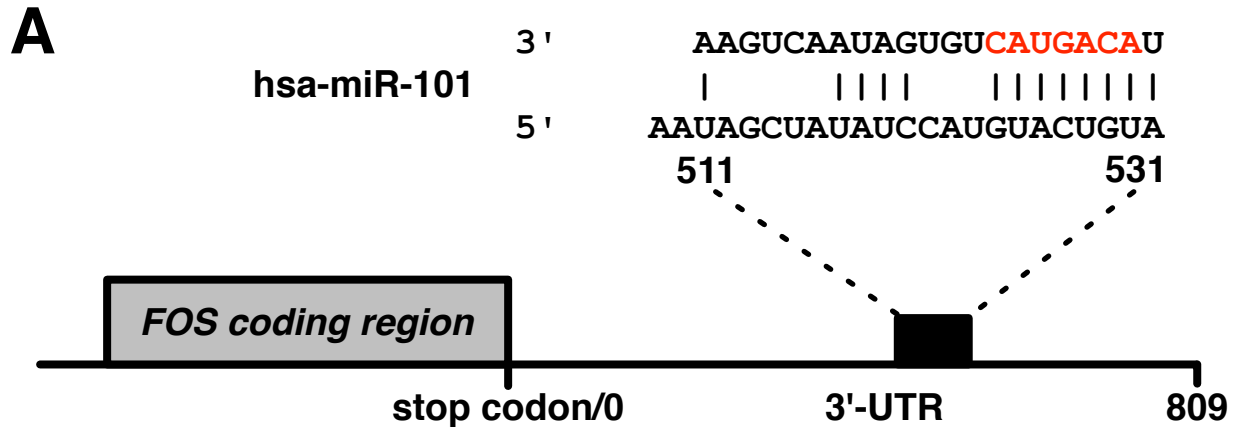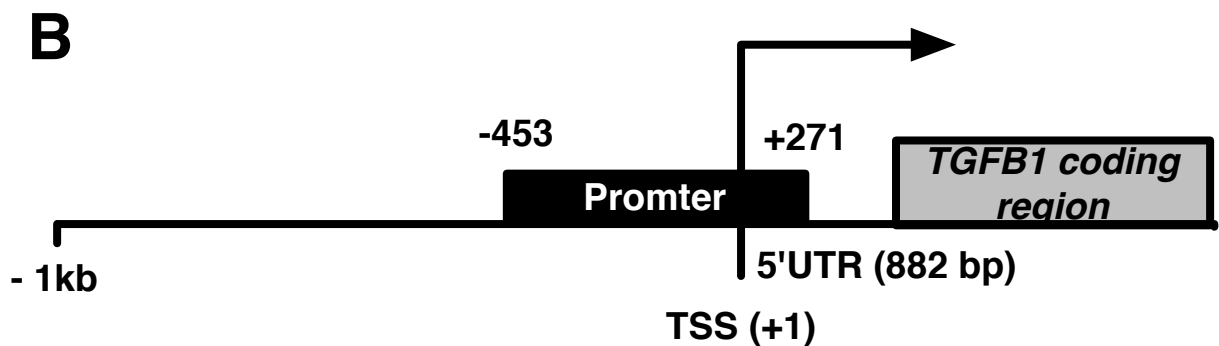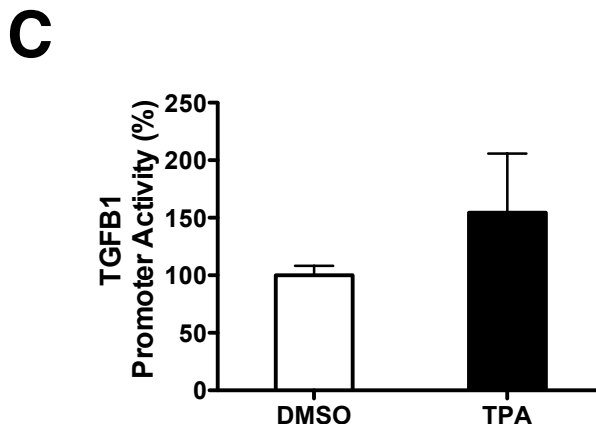

**Supplementary figure S3. Effects of miR-101 on colony-forming activity of cultured HepG2 cells.** HepG2 cells were transfected with 15 nM of scrambled oligonucleotides or miR-101 mimetic and seeded onto 6-well plate at 2000 cells/well for 14 days. The cultures were fixed and stained with crystal violet.

**Scramble**

**miR-101**

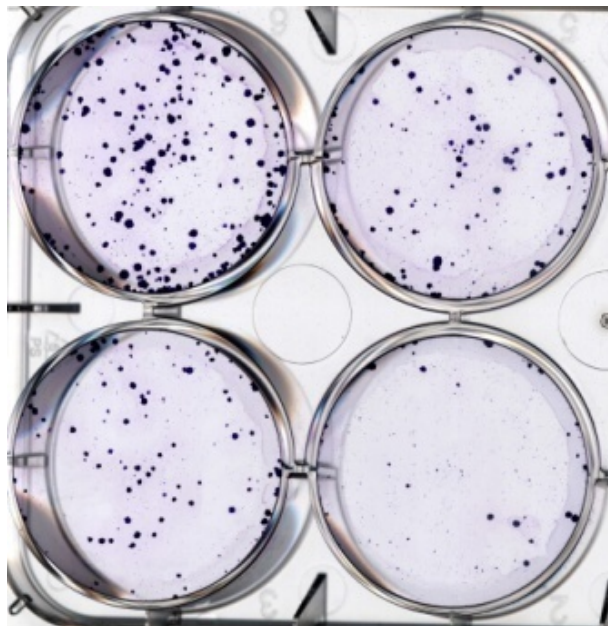

**Supplementary Table S1 - Gene-specific PCR primers**

| <b>Gene symbol</b> | <b>Forward Sequence</b>   | <b>Reverse Sequence</b>   |
|--------------------|---------------------------|---------------------------|
| EEF1A1             | CAATGTGGGCTTCAATGTCAA     | CATAGCCGGCGCTTATTTG       |
| FOS                | CCCTGCCTCTCCTCAAT         | GACCCAGATAGGTCCATGT       |
| EGR1               | TGCTGGTGGAGACCAGTTA       | CCACTGACCAAGCTGAAGA       |
| SP1                | GAAGATATGGCACTTCTCCAAC    | CCTCTTAGAAGAGGTCTGGTA     |
| CEBPD              | GCAACGACCCATACTCA         | TGGTAAGTCCAGGCTGTAG       |
| RELA               | AGTGTGTGAAGAAGCGG         | ACAGCATTGAGGTCGTAG        |
| STAT3              | ACCTATAGCTACATACTCCTGG    | AATACAGAAAGGCTATGCTGAT    |
| EZH2               | CTTGTGGACCACAGTGTTAC      | TGGGCTGCTACTGTTATT        |
| SUZ12              | AGTTAAACCTACTCAAATATTGCT  | GTTGCCTTGTATTGTTATAGAGA   |
| NFYA               | TTGAAGAAGAGCCTCTCTACG     | CCGAGACTCATGCAGGT         |
| CCND1              | TATAACAAGTGTGTCTTACGTGC   | CTTCATTGAGATTTGGAGTCTCTTT |
| CCNE1              | CAAATCTTTATACAGATTGCAGAGC | CTTGACACAGTTCCTATGTCG     |
| CDK4               | ACTGGCCTCGAGATGTA         | AAAGGCAGAGATTCGCT         |
| CDKN1B             | GCTTACTCTGTCCATTTATCCAC   | CACAGGTACACTTCAAATGGT     |
| CDKN2A             | CTCGGAAACTTAGATCATCAG     | TAAATGGACATTTACGGTAGTGGG  |
| CDKN2B             | TGGATCCCACAGTACTATATTACAC | ACAGTATATATTAGGCTGCTGATGA |
| MCM2               | GTGCCCTCTGTGCTTTA         | AAACAGTCATGCCAGGT         |
| MCM3               | GGAGGGCATTGTCACTAAA       | AGATCAGAATAACGTCGCT       |
| MCM4               | AGGAACCTTCCAGGAAACC       | AATCCTTCTTGTCCCG          |
| MCM5               | CAAGTGTCCACGTTGGAT        | TGGGAGCCAATGGCAA          |
| MCM6               | TGTGAAAGAATGGGAGAAAGTG    | AAAGAGCATCAGCAGGAC        |
| MCM6               | GTGAAAGAATGGGAGAAAGTG     | CTTCATCATGCCATGTATAGTAGG  |
| MCM7               | CTCTTTGCTGATGCCGT         | TGCTCCATCATTAGCCGA        |
| MDM2               | CAACCAATTCAAATGATTGTGCT   | GAAGAAATCTATGTGAATTGAGGC  |

Supplementary table S2. miRNA differentially expressed in normal and HCC samples

| microRNA<br>Name                   | miRNA levels (39-Ct) |              | Fold-Change<br>(T vs. N) | Paired T-test<br>p-value | Inversely<br>altered |
|------------------------------------|----------------------|--------------|--------------------------|--------------------------|----------------------|
|                                    | Normal               | Tumor        |                          |                          |                      |
| <b>miRNA up-modulated in HCC</b>   |                      |              |                          |                          |                      |
| miR-10b                            | 5.21 ± 0.73          | 7.20 ± 1.53  | 3.98                     | 5.57E-05                 | Y                    |
| miR-18a                            | 6.27 ± 0.80          | 8.20 ± 1.56  | 3.82                     | 2.79E-04                 | N                    |
| miR-182                            | 4.49 ± 0.45          | 6.37 ± 1.76  | 3.66                     | 6.86E-05                 | N                    |
| miR-221                            | 10.49 ± 0.61         | 12.26 ± 1.18 | 3.40                     | 4.86E-06                 | N                    |
| miR-224                            | 6.38 ± 1.21          | 7.91 ± 1.94  | 2.88                     | 1.12E-02                 | N                    |
| miR-222                            | 9.45 ± 0.78          | 10.88 ± 0.88 | 2.70                     | 1.42E-06                 | N                    |
| miR-15b*                           | 5.59 ± 0.47          | 7.03 ± 0.83  | 2.70                     | 2.82E-06                 | N                    |
| miR-93                             | 13.92 ± 0.68         | 15.32 ± 1.11 | 2.64                     | 4.48E-06                 | N                    |
| miR-324-5p                         | 9.19 ± 0.29          | 10.37 ± 0.95 | 2.27                     | 1.81E-05                 | N                    |
| miR-491-5p                         | 7.56 ± 1.20          | 8.73 ± 1.44  | 2.24                     | 1.31E-03                 | N                    |
| miR-135a                           | 5.46 ± 1.38          | 6.59 ± 1.60  | 2.19                     | 2.47E-02                 | N                    |
| miR-128b                           | 8.13 ± 0.83          | 9.17 ± 1.00  | 2.05                     | 3.83E-05                 | N                    |
| <b>miRNA down-modulated in HCC</b> |                      |              |                          |                          |                      |
| miR-199a-3p                        | 10.83 ± 1.22         | 7.63 ± 2.29  | -9.16                    | 9.02E-06                 | Y                    |
| miR-199a-5p                        | 11.25 ± 0.97         | 8.31 ± 2.15  | -7.71                    | 6.48E-06                 | N                    |
| miR-122                            | 20.79 ± 0.72         | 18.33 ± 2.93 | -5.49                    | 1.10E-03                 | N                    |
| miR-139-5p                         | 12.73 ± 0.47         | 10.32 ± 1.27 | -5.35                    | 1.54E-07                 | Y                    |
| miR-125b                           | 15.54 ± 0.49         | 13.34 ± 2.26 | -4.60                    | 1.50E-04                 | N                    |
| miR-99a                            | 11.30 ± 0.60         | 9.14 ± 2.16  | -4.47                    | 2.12E-04                 | N                    |
| miR-100                            | 12.47 ± 0.83         | 10.39 ± 2.90 | -4.22                    | 5.94E-03                 | Y                    |
| miR-451                            | 11.26 ± 0.84         | 9.52 ± 1.23  | -3.35                    | 1.38E-05                 | N                    |
| miR-378                            | 12.64 ± 0.87         | 10.94 ± 0.95 | -3.25                    | 5.19E-07                 | N                    |
| miR-150                            | 13.63 ± 1.31         | 11.97 ± 2.21 | -3.17                    | 5.01E-03                 | N                    |
| miR-195                            | 9.93 ± 0.53          | 8.32 ± 1.78  | -3.04                    | 1.05E-03                 | N                    |
| miR-10a                            | 8.45 ± 0.71          | 6.99 ± 1.57  | -2.74                    | 1.54E-03                 | N                    |
| miR-486-5p                         | 12.56 ± 0.72         | 11.11 ± 1.41 | -2.74                    | 4.75E-04                 | N                    |
| miR-130a                           | 9.45 ± 1.06          | 8.10 ± 1.70  | -2.54                    | 2.97E-03                 | N                    |
| miR-30a*                           | 9.37 ± 0.35          | 8.03 ± 1.47  | -2.52                    | 4.51E-04                 | N                    |
| miR-29c                            | 9.10 ± 0.64          | 7.92 ± 1.76  | -2.27                    | 3.48E-03                 | N                    |
| miR-215                            | 7.84 ± 0.51          | 6.66 ± 1.55  | -2.27                    | 1.32E-03                 | N                    |
| let-7b                             | 12.88 ± 1.24         | 11.74 ± 1.75 | -2.21                    | 5.47E-03                 | N                    |
| miR-192                            | 14.06 ± 0.65         | 12.92 ± 1.60 | -2.21                    | 7.34E-03                 | N                    |
| miR-223                            | 13.53 ± 0.88         | 12.41 ± 1.78 | -2.18                    | 1.55E-02                 | N                    |
| miR-497                            | 9.93 ± 0.57          | 8.81 ± 1.10  | -2.17                    | 3.82E-05                 | N                    |
| miR-101                            | 6.07 ± 0.84          | 4.98 ± 0.90  | -2.13                    | 1.48E-05                 | Y                    |
| miR-194                            | 14.35 ± 0.64         | 13.29 ± 1.54 | -2.09                    | 8.67E-03                 | N                    |
| miR-22                             | 12.45 ± 1.53         | 11.41 ± 1.92 | -2.06                    | 7.08E-03                 | Y                    |
| miR-548c-5p                        | 5.41 ± 1.10          | 4.38 ± 0.79  | -2.05                    | 2.21E-03                 | N                    |
| miR-450a                           | 8.43 ± 0.47          | 7.42 ± 0.69  | -2.01                    | 2.64E-06                 | N                    |

Supplementary table S3. miRNA altered by TPA treatment in HepG2 cells

| miR Name                           | miRNA level (39-Ct) |       | Fold change<br>TPA / DMSO | Inversely<br>altered |
|------------------------------------|---------------------|-------|---------------------------|----------------------|
|                                    | DMSO                | TPA   |                           |                      |
| <b>miRNA down-modulated by TPA</b> |                     |       |                           |                      |
| miR-486-3p                         | 7.06                | 3.88  | -9.06                     | N                    |
| miR-143                            | 7.28                | 4.87  | -5.33                     | N                    |
| miR-326                            | 10.15               | 7.91  | -4.72                     | N                    |
| miR-455-3p                         | 14.91               | 12.68 | -4.68                     | N                    |
| miR-483-3p                         | 15.33               | 13.28 | -4.16                     | N                    |
| miR-200c*                          | 6.64                | 4.60  | -4.10                     | N                    |
| miR-10b                            | 11.10               | 9.13  | -3.92                     | Y                    |
| miR-674                            | 5.76                | 3.88  | -3.68                     | N                    |
| miR-202                            | 6.31                | 4.58  | -3.32                     | N                    |
| <b>miRNA up-modulated by TPA</b>   |                     |       |                           |                      |
| miR-29b                            | 4.67                | 8.75  | 16.95                     | N                    |
| miR-100                            | 3.90                | 7.74  | 14.36                     | Y                    |
| miR-29a                            | 8.74                | 12.19 | 10.91                     | N                    |
| miR-27a                            | 7.28                | 10.26 | 7.89                      | N                    |
| miR-29b-1*                         | 6.71                | 9.53  | 7.09                      | N                    |
| miR-23a                            | 9.81                | 12.58 | 6.84                      | N                    |
| miR-139-5p                         | 6.72                | 9.25  | 5.79                      | Y                    |
| miR-199a-3p                        | 4.65                | 7.02  | 5.17                      | Y                    |
| miR-24                             | 17.02               | 19.18 | 4.47                      | N                    |
| miR-33b                            | 3.90                | 5.72  | 3.54                      | N                    |
| miR-31                             | 9.59                | 11.42 | 3.54                      | N                    |
| miR-101                            | 5.54                | 7.28  | 3.35                      | Y                    |
| miR-221                            | 13.17               | 14.83 | 3.17                      | N                    |
| miR-196a*                          | 3.90                | 5.56  | 3.16                      | N                    |
| miR-22                             | 6.50                | 8.09  | 3.00                      | Y                    |

Supplementary table S4. Differentially expressed genes in HCC tissues

| Affy<br>Probe ID | Gene<br>Symbol | Paired T-test<br>p-value | Fold Change<br>T / N |
|------------------|----------------|--------------------------|----------------------|
| 202874_s_at      | ATP6V1C1       | 3.90E-05                 | 2.40                 |
| 214054_at        | DOK2           | 5.35E-05                 | -2.71                |
| 219146_at        | C17orf42       | 1.02E-04                 | 2.25                 |
| 207804_s_at      | FCN2           | 1.46E-04                 | -32.07               |
| 226276_at        | TMEM167A       | 1.54E-04                 | 2.26                 |
| 207654_x_at      | DR1            | 1.70E-04                 | 2.05                 |
| 209365_s_at      | ECM1           | 2.05E-04                 | -6.78                |
| 216032_s_at      | ERGIC3         | 2.05E-04                 | 2.26                 |
| 209774_x_at      | CXCL2          | 2.15E-04                 | -14.92               |
| 226980_at        | DEPDC1B        | 2.47E-04                 | 61.36                |
| 218918_at        | MAN1C1         | 2.73E-04                 | -4.97                |
| 202579_x_at      | HMGNA4         | 2.74E-04                 | 2.56                 |
| 200977_s_at      | TAX1BP1        | 3.48E-04                 | 2.47                 |
| 204224_s_at      | GCH1           | 3.63E-04                 | -7.34                |
| 203077_s_at      | SMAD2          | 4.36E-04                 | 3.50                 |
| 203434_s_at      | MME            | 4.52E-04                 | -21.57               |
| 208270_s_at      | RNPEP          | 4.81E-04                 | 2.19                 |
| 219330_at        | VANGL1         | 4.96E-04                 | 2.06                 |
| 213301_x_at      | TRIM24         | 4.98E-04                 | 3.63                 |
| 217820_s_at      | ENAH           | 5.22E-04                 | 5.54                 |
| 209165_at        | AATF           | 5.46E-04                 | 2.14                 |
| 201329_s_at      | ETS2           | 5.48E-04                 | -3.19                |
| 210428_s_at      | HGS            | 5.53E-04                 | 3.94                 |
| 229349_at        | LIN28B         | 5.62E-04                 | 114.04               |
| 223280_x_at      | MS4A6A         | 5.67E-04                 | -5.77                |
| 235783_at        | MRTO4          | 6.33E-04                 | 2.71                 |
| 213427_at        | RPP40          | 6.71E-04                 | 3.71                 |
| 222492_at        | PDXK           | 7.35E-04                 | 2.01                 |
| 221139_s_at      | CSAD           | 7.47E-04                 | -2.48                |
| 201859_at        | SRGN           | 7.51E-04                 | -2.68                |
| 227740_at        | UHMK1          | 7.51E-04                 | 2.13                 |
| 213670_x_at      | NSUN5B         | 7.52E-04                 | 2.24                 |
| 238686_at        | FBXO3          | 7.53E-04                 | 2.16                 |
| 238456_at        | LOC100289230   | 7.61E-04                 | 3.99                 |
| 217122_s_at      | RP11-345P4.4   | 7.91E-04                 | 2.06                 |
| 208743_s_at      | YWHAB          | 8.09E-04                 | 2.23                 |
| 200055_at        | TAF10          | 8.30E-04                 | 2.02                 |
| 203652_at        | MAP3K11        | 8.44E-04                 | 2.30                 |
| 205382_s_at      | CFD            | 8.56E-04                 | -4.20                |
| 201405_s_at      | COPS6          | 8.64E-04                 | 2.09                 |
| 231882_at        | FLJ39632       | 8.70E-04                 | 7.88                 |
| 217885_at        | IPO9           | 8.82E-04                 | 2.49                 |
| 218533_s_at      | UCKL1          | 8.84E-04                 | 2.42                 |
| 212949_at        | NCAPH          | 8.89E-04                 | 15.83                |
| 201755_at        | MCM5           | 9.01E-04                 | 4.02                 |
| 224448_s_at      | C6orf125       | 9.25E-04                 | 2.46                 |
| 216623_x_at      | TOX3           | 9.54E-04                 | 2.23                 |
| 1559946_s_at     | RUVBL2         | 9.55E-04                 | 2.22                 |
| 227796_at        | ZFP62          | 1.03E-03                 | 3.62                 |
| 212067_s_at      | C1R            | 1.07E-03                 | -3.97                |
| 204547_at        | RAB40B         | 1.09E-03                 | 4.48                 |
| 205730_s_at      | ABLIM3         | 1.10E-03                 | -2.06                |
| 211052_s_at      | TBCD           | 1.11E-03                 | 2.42                 |
| 219931_s_at      | KLHL12         | 1.12E-03                 | 2.43                 |
| 218662_s_at      | NCAPG          | 1.14E-03                 | 24.15                |
| 222843_at        | FIGNL1         | 1.14E-03                 | 4.65                 |
| 226522_at        | PODN           | 1.14E-03                 | -4.47                |
| 211663_x_at      | PTGDS          | 1.16E-03                 | -3.60                |
| 234915_s_at      | DENR           | 1.16E-03                 | 2.36                 |
| 225808_at        | C17orf95       | 1.18E-03                 | 2.96                 |
| 225169_at        | INTS4          | 1.21E-03                 | 2.06                 |
| 225788_at        | C6orf153       | 1.24E-03                 | 3.01                 |
| 224160_s_at      | ACAD9          | 1.29E-03                 | 2.24                 |
| 224356_x_at      | MS4A6A         | 1.29E-03                 | -5.47                |
| 206374_at        | DUSP8          | 1.32E-03                 | 3.97                 |
| 230478_at        | OIT3           | 1.41E-03                 | -41.84               |
| 232893_at        | LMBRD2         | 1.42E-03                 | 2.09                 |
| 205091_x_at      | RECQL          | 1.49E-03                 | 2.27                 |
| 1559000_at       | C10orf108      | 1.50E-03                 | -5.95                |
| 209421_at        | MSH2           | 1.50E-03                 | 5.38                 |

| Affy<br>Probe ID | Gene<br>Symbol | Paired T-test<br>p-value | Fold Change<br>T / N |
|------------------|----------------|--------------------------|----------------------|
| 212474_at        | AVL9           | 1.50E-03                 | 2.52                 |
| 1555390_at       | C14orf21       | 1.53E-03                 | 2.26                 |
| 201378_s_at      | UBAP2L         | 1.53E-03                 | 2.48                 |
| 212899_at        | CDC2L6         | 1.53E-03                 | 2.13                 |
| 212681_at        | EPB41L3        | 1.57E-03                 | -2.78                |
| 213222_at        | PLCB1          | 1.60E-03                 | 4.62                 |
| 201555_at        | MCM3           | 1.61E-03                 | 4.45                 |
| 233013_x_at      | LOC220906      | 1.71E-03                 | 2.83                 |
| 203819_s_at      | IGF2BP3        | 1.74E-03                 | 24.57                |
| 204569_at        | ICK            | 1.74E-03                 | 3.12                 |
| 217770_at        | PIGT           | 1.74E-03                 | 2.57                 |
| 200658_s_at      | PHB            | 1.75E-03                 | 2.53                 |
| 218966_at        | MYO5C          | 1.75E-03                 | 2.63                 |
| 223649_s_at      | SLC25A39       | 1.76E-03                 | 2.83                 |
| 218682_s_at      | SLC4A1AP       | 1.80E-03                 | 2.18                 |
| 201491_at        | AHSA1          | 1.82E-03                 | 3.85                 |
| 202107_s_at      | MCM2           | 1.86E-03                 | 17.21                |
| 204428_s_at      | LCAT           | 1.90E-03                 | -23.45               |
| 1552278_a_at     | SLC46A1        | 1.91E-03                 | 2.36                 |
| 220266_s_at      | KLF4           | 1.92E-03                 | -3.71                |
| 206429_at        | F2RL1          | 1.96E-03                 | -2.80                |
| 218709_s_at      | IFT52          | 2.00E-03                 | 2.05                 |
| 230250_at        | PTPRB          | 2.04E-03                 | -2.27                |
| 221452_s_at      | TMEM14B        | 2.08E-03                 | 2.20                 |
| 226488_at        | RCCD1          | 2.09E-03                 | 2.34                 |
| 223289_s_at      | USP38          | 2.11E-03                 | -2.29                |
| 217232_x_at      | HBB            | 2.16E-03                 | -12.99               |
| 221983_at        | FAM134A        | 2.17E-03                 | 2.39                 |
| 201271_s_at      | RALY           | 2.19E-03                 | 2.96                 |
| 208955_at        | DUT            | 2.21E-03                 | 2.47                 |
| 205695_at        | SDS            | 2.24E-03                 | -51.68               |
| 217299_s_at      | NBN            | 2.24E-03                 | 2.92                 |
| 207108_s_at      | NIPBL          | 2.27E-03                 | 3.17                 |
| 223051_at        | SSU72          | 2.29E-03                 | 3.20                 |
| 1564521_x_at     | PRMT5          | 2.32E-03                 | 3.27                 |
| 200020_at        | TARDBP         | 2.41E-03                 | 2.28                 |
| 220357_s_at      | SGK2           | 2.41E-03                 | 2.94                 |
| 217839_at        | TFG            | 2.42E-03                 | 2.53                 |
| 202543_s_at      | GMFB           | 2.47E-03                 | 3.02                 |
| 203666_at        | CXCL12         | 2.53E-03                 | -15.50               |
| 218424_s_at      | STEAP3         | 2.54E-03                 | -4.69                |
| 214612_x_at      | MAGEA6         | 2.55E-03                 | 150.29               |
| 242350_s_at      | LOC100128098   | 2.55E-03                 | 29.89                |
| 205440_s_at      | NPY1R          | 2.56E-03                 | -10.65               |
| 224824_at        | FAM36A         | 2.58E-03                 | 2.18                 |
| 227153_at        | IMMP2L         | 2.60E-03                 | 2.02                 |
| 209596_at        | MXRA5          | 2.61E-03                 | -3.42                |
| 224341_x_at      | TLR4           | 2.66E-03                 | -3.71                |
| 239989_at        | CNTLN          | 2.66E-03                 | -3.08                |
| 225802_at        | TOP1MT         | 2.72E-03                 | 2.82                 |
| 203554_x_at      | PTTG1          | 2.75E-03                 | 9.25                 |
| 227936_at        | TMEM68         | 2.82E-03                 | 2.41                 |
| 229908_s_at      | UNKL           | 2.83E-03                 | 3.02                 |
| 226558_at        | LOC389834      | 2.84E-03                 | 2.14                 |
| 218134_s_at      | RBM22          | 2.90E-03                 | 2.20                 |
| 208820_at        | PTK2           | 2.91E-03                 | 2.77                 |
| 1559315_s_at     | LOC144481      | 2.92E-03                 | -2.26                |
| 203943_at        | KIF3B          | 2.94E-03                 | 2.32                 |
| 209278_s_at      | TFPI2          | 2.96E-03                 | -15.08               |
| 49452_at         | ACACB          | 2.97E-03                 | -2.85                |
| 217840_at        | DDX41          | 2.98E-03                 | 2.76                 |
| 206344_at        | PON1           | 3.00E-03                 | -3.04                |
| 210481_s_at      | CLEC4M         | 3.03E-03                 | -115.40              |
| 219192_at        | UBAP2          | 3.04E-03                 | 4.52                 |
| 202528_at        | GALE           | 3.05E-03                 | 2.63                 |
| 38069_at         | CLCN7          | 3.05E-03                 | 2.11                 |
| 221928_at        | ACACB          | 3.13E-03                 | -2.47                |
| 204391_x_at      | TRIM24         | 3.14E-03                 | 3.81                 |
| 221732_at        | CANT1          | 3.14E-03                 | 3.60                 |
| 225044_at        | NT5C3L         | 3.15E-03                 | 2.19                 |
| 213006_at        | CEBPD          | 3.18E-03                 | -8.62                |



| Affy<br>Probe ID | Gene<br>Symbol | Paired T-test<br>p-value | Fold Change<br>T / N |
|------------------|----------------|--------------------------|----------------------|
| 200950_at        | ARPC1A         | 3.21E-03                 | 2.16                 |
| 204026_s_at      | ZWINT          | 3.27E-03                 | 8.43                 |
| 224724_at        | SULF2          | 3.28E-03                 | -4.90                |
| 204267_x_at      | PKMYT1         | 3.31E-03                 | 2.37                 |
| 1558201_s_at     | SLC4A1AP       | 3.36E-03                 | 2.10                 |
| 202953_at        | C1QB           | 3.36E-03                 | -3.04                |
| 211813_x_at      | DCN            | 3.36E-03                 | -22.79               |
| 221541_at        | CRISPLD2       | 3.38E-03                 | -4.64                |
| 220525_s_at      | AUP1           | 3.39E-03                 | 2.53                 |
| 217932_at        | MRPS7          | 3.46E-03                 | 2.18                 |
| 206188_at        | ZNF623         | 3.48E-03                 | 5.01                 |
| 209470_s_at      | GPM6A          | 3.50E-03                 | -7.18                |
| 212212_s_at      | INTS1          | 3.55E-03                 | 2.81                 |
| 213881_x_at      | SUMO2          | 3.55E-03                 | 2.25                 |
| 201292_at        | TOP2A          | 3.56E-03                 | 17.48                |
| 201061_s_at      | STOM           | 3.62E-03                 | -4.89                |
| 218782_s_at      | ATAD2          | 3.64E-03                 | 4.40                 |
| 205053_at        | PRIM1          | 3.66E-03                 | 6.60                 |
| 242915_at        | ZNF682         | 3.69E-03                 | 2.46                 |
| 201601_x_at      | IFITM1         | 3.74E-03                 | -5.22                |
| 201699_at        | PSMC6          | 3.75E-03                 | 2.07                 |
| 210915_x_at      | TRBC1          | 3.78E-03                 | -2.78                |
| 201629_s_at      | ACP1           | 3.79E-03                 | 2.14                 |
| 210559_s_at      | CDC2           | 3.83E-03                 | 11.98                |
| 209116_x_at      | HBB            | 3.85E-03                 | -16.52               |
| 213524_s_at      | G0S2           | 3.85E-03                 | -6.40                |
| 231540_at        | hCG_1817306    | 3.86E-03                 | 2.14                 |
| 225210_s_at      | FAM103A1       | 3.90E-03                 | 2.87                 |
| 209448_at        | HTATIP2        | 3.91E-03                 | 3.68                 |
| 204019_s_at      | SH3YL1         | 3.92E-03                 | -5.90                |
| 235576_at        | WDR27          | 3.92E-03                 | 2.71                 |
| 219979_s_at      | C11orf73       | 3.98E-03                 | 2.50                 |
| 210097_s_at      | NOL7           | 3.99E-03                 | 2.62                 |
| 226732_at        | RBM33          | 4.01E-03                 | 2.11                 |
| 218700_s_at      | RAB7L1         | 4.05E-03                 | 2.23                 |
| 224308_s_at      | INTS2          | 4.05E-03                 | 3.43                 |
| 227141_at        | TYW3           | 4.05E-03                 | 2.43                 |
| 214163_at        | HSPB11         | 4.07E-03                 | 3.55                 |
| 1559065_a_at     | CLEC4G         | 4.09E-03                 | -143.33              |
| 222484_s_at      | CXCL14         | 4.09E-03                 | -137.78              |
| 218365_s_at      | DARS2          | 4.10E-03                 | 2.50                 |
| 203213_at        | CDC2           | 4.11E-03                 | 17.44                |
| 203732_at        | TRIP4          | 4.17E-03                 | 2.28                 |
| 201342_at        | SNRPC          | 4.20E-03                 | 3.32                 |
| 223819_x_at      | COMMD5         | 4.24E-03                 | 2.33                 |
| 212778_at        | PACS2          | 4.28E-03                 | 2.18                 |
| 205872_x_at      | PDE4DIP        | 4.30E-03                 | -4.49                |
| 213193_x_at      | TRBC1          | 4.31E-03                 | -2.39                |
| 214774_x_at      | TOX3           | 4.32E-03                 | 2.67                 |
| 220604_x_at      | FTCD           | 4.40E-03                 | -4.03                |
| 210387_at        | HIST1H2BG      | 4.41E-03                 | 5.33                 |
| 214198_s_at      | DGCR2          | 4.42E-03                 | 3.01                 |
| 57532_at         | DVL2           | 4.42E-03                 | 2.49                 |
| 212141_at        | MCM4           | 4.45E-03                 | 7.17                 |
| 217832_at        | SYNCRIP        | 4.51E-03                 | 2.22                 |
| 227350_at        | HELLS          | 4.55E-03                 | 9.65                 |
| 235590_at        | FAM178A        | 4.59E-03                 | 2.19                 |
| 215078_at        | SOD2           | 4.61E-03                 | -9.87                |
| 213349_at        | TMCC1          | 4.63E-03                 | 3.63                 |
| 223077_at        | TMOD3          | 4.63E-03                 | 2.20                 |
| 226218_at        | IL7R           | 4.64E-03                 | -3.07                |
| 205866_at        | FCN3           | 4.66E-03                 | -28.19               |
| 226287_at        | CCDC34         | 4.66E-03                 | 5.42                 |
| 219119_at        | LSM8           | 4.71E-03                 | 2.12                 |
| 204141_at        | TUBB2A         | 4.81E-03                 | 3.46                 |
| 207396_s_at      | ALG3           | 4.81E-03                 | 2.22                 |
| 227265_at        | FGL2           | 4.83E-03                 | -2.28                |
| 213330_s_at      | STIP1          | 4.87E-03                 | 4.28                 |
| 210213_s_at      | EIF6           | 4.94E-03                 | 2.65                 |
| 238021_s_at      | CRNDE          | 5.02E-03                 | 20.89                |
| 201303_at        | EIF4A3         | 5.09E-03                 | 2.13                 |

| Affy<br>Probe ID | Gene<br>Symbol | Paired T-test<br>p-value | Fold Change<br>T / N |
|------------------|----------------|--------------------------|----------------------|
| 209773_s_at      | RRM2           | 5.15E-03                 | 14.88                |
| 37254_at         | ZNF133         | 5.17E-03                 | 2.15                 |
| 204349_at        | MED7           | 5.24E-03                 | 2.66                 |
| 201763_s_at      | DAXX           | 5.26E-03                 | 2.05                 |
| 213025_at        | THUMPD1        | 5.30E-03                 | 2.06                 |
| 223333_s_at      | ANGPTL4        | 5.32E-03                 | -2.96                |
| 209219_at        | RDBP           | 5.37E-03                 | 6.17                 |
| 216241_s_at      | TCEA1          | 5.39E-03                 | 2.14                 |
| 212351_at        | EIF2B5         | 5.41E-03                 | 2.05                 |
| 222687_s_at      | ACER3          | 5.41E-03                 | 2.17                 |
| 200007_at        | SRP14          | 5.43E-03                 | 2.01                 |
| 201459_at        | RUVBL2         | 5.43E-03                 | 3.06                 |
| 218367_x_at      | USP21          | 5.44E-03                 | 2.77                 |
| 208813_at        | GOT1           | 5.45E-03                 | -6.70                |
| 217704_x_at      | SUZ12P         | 5.45E-03                 | 2.79                 |
| 226033_at        | USP31          | 5.47E-03                 | 2.63                 |
| 1552634_a_at     | ZNF101         | 5.51E-03                 | 2.94                 |
| 1554830_a_at     | STEAP3         | 5.51E-03                 | -4.30                |
| 202321_at        | GGPS1          | 5.51E-03                 | 2.86                 |
| 231769_at        | FBXO6          | 5.55E-03                 | 4.46                 |
| 205107_s_at      | EFNA4          | 5.58E-03                 | 5.05                 |
| 215691_x_at      | HSPB11         | 5.59E-03                 | 2.69                 |
| 206513_at        | AIM2           | 5.62E-03                 | -7.10                |
| 220044_x_at      | LUC7L3         | 5.63E-03                 | 2.11                 |
| 1555175_a_at     | PBLD           | 5.64E-03                 | -5.76                |
| 209821_at        | IL33           | 5.66E-03                 | -4.74                |
| 218962_s_at      | TMEM168        | 5.67E-03                 | 3.22                 |
| 222037_at        | MCM4           | 5.70E-03                 | 4.08                 |
| 228393_s_at      | ZNF302         | 5.73E-03                 | 2.32                 |
| 227084_at        | DTNA           | 5.74E-03                 | 10.38                |
| 223784_at        | TMEM27         | 5.79E-03                 | -16.38               |
| 214505_s_at      | FHL1           | 5.80E-03                 | -2.90                |
| 231265_at        | COX7B2         | 5.81E-03                 | 43.53                |
| 222251_s_at      | GMEB2          | 5.87E-03                 | 2.58                 |
| 209935_at        | ATP2C1         | 5.94E-03                 | 2.22                 |
| 202238_s_at      | NNMT           | 5.96E-03                 | -66.99               |
| 44120_at         | ADCK2          | 5.98E-03                 | 2.44                 |
| 203714_s_at      | TBCE           | 6.00E-03                 | 3.03                 |
| 207405_s_at      | RAD17          | 6.01E-03                 | 2.71                 |
| 201739_at        | SGK1           | 6.04E-03                 | -5.13                |
| 207995_s_at      | CLEC4M         | 6.04E-03                 | -38.25               |
| 231698_at        | FLJ36848       | 6.08E-03                 | -2.92                |
| 223421_at        | CYHR1          | 6.09E-03                 | 2.12                 |
| 224742_at        | ABHD12         | 6.13E-03                 | 2.50                 |
| 204787_at        | VSIG4          | 6.15E-03                 | -9.75                |
| 214097_at        | RPS21          | 6.15E-03                 | 3.12                 |
| 38918_at         | SOX13          | 6.17E-03                 | 2.09                 |
| 226166_x_at      | STK36          | 6.18E-03                 | 2.62                 |
| 202095_s_at      | BIRC5          | 6.20E-03                 | 33.56                |
| 218185_s_at      | ARMC1          | 6.24E-03                 | 2.45                 |
| 206632_s_at      | APOBEC3B       | 6.26E-03                 | 21.84                |
| 230318_at        | SERPINA1       | 6.28E-03                 | -6.52                |
| 203098_at        | CDYL           | 6.29E-03                 | 3.10                 |
| 228268_at        | FMO2           | 6.34E-03                 | -2.57                |
| 242001_at        | IDH1           | 6.37E-03                 | 3.56                 |
| 201893_x_at      | DCN            | 6.39E-03                 | -14.14               |
| 204118_at        | CD48           | 6.40E-03                 | -2.47                |
| 217806_s_at      | POLDIP2        | 6.40E-03                 | 2.10                 |
| 228930_at        | SCARNA15       | 6.40E-03                 | 3.95                 |
| 202988_s_at      | RGS1           | 6.43E-03                 | -2.96                |
| 221558_s_at      | LEF1           | 6.45E-03                 | 4.65                 |
| 213696_s_at      | MED8           | 6.49E-03                 | 2.34                 |
| 200943_at        | HMGN1          | 6.51E-03                 | 2.49                 |
| 203087_s_at      | KIF2A          | 6.59E-03                 | 2.47                 |
| 212588_at        | PTPRC          | 6.70E-03                 | -2.62                |
| 242541_at        | ABC9           | 6.70E-03                 | -3.47                |
| 220526_s_at      | MRPL20         | 6.73E-03                 | 2.02                 |
| 224716_at        | SLC35B2        | 6.74E-03                 | 2.56                 |
| 244293_at        | UQCRB          | 6.82E-03                 | -2.87                |
| 212021_s_at      | MKI67          | 6.85E-03                 | 7.19                 |
| 200664_s_at      | DNAJB1         | 6.92E-03                 | -3.28                |

| Affy<br>Probe ID | Gene<br>Symbol | Paired T-test<br>p-value | Fold Change<br>T / N |
|------------------|----------------|--------------------------|----------------------|
| 243296_at        | NAMPT          | 6.92E-03                 | -8.59                |
| 220186_s_at      | PCDH24         | 6.94E-03                 | -19.47               |
| 218984_at        | PUS7           | 6.96E-03                 | 3.88                 |
| 212150_at        | EFR3A          | 6.97E-03                 | 2.09                 |
| 217917_s_at      | DYNLRB1        | 6.98E-03                 | 2.67                 |
| 203717_at        | DPP4           | 7.00E-03                 | 4.05                 |
| 218135_at        | ERGIC2         | 7.00E-03                 | 2.78                 |
| 221879_at        | CALML4         | 7.02E-03                 | 2.46                 |
| 223276_at        | MST150         | 7.02E-03                 | -2.43                |
| 205034_at        | CCNE2          | 7.03E-03                 | 7.05                 |
| 209160_at        | AKR1C3         | 7.06E-03                 | 5.15                 |
| 208370_s_at      | RCAN1          | 7.07E-03                 | -5.89                |
| 202633_at        | TOPBP1         | 7.11E-03                 | 2.45                 |
| 34406_at         | PACS2          | 7.11E-03                 | 2.37                 |
| 206727_at        | C9             | 7.14E-03                 | -38.13               |
| 213684_s_at      | PDLIM5         | 7.23E-03                 | -2.60                |
| 213632_at        | DHODH          | 7.24E-03                 | -5.68                |
| 205301_s_at      | OGG1           | 7.27E-03                 | 2.54                 |
| 203075_at        | SMAD2          | 7.29E-03                 | 2.63                 |
| 218480_at        | AGBL5          | 7.30E-03                 | 2.64                 |
| 221772_s_at      | PPP2R2D        | 7.30E-03                 | -2.34                |
| 228325_at        | KIAA0146       | 7.34E-03                 | -8.37                |
| 216903_s_at      | CBARA1         | 7.40E-03                 | -2.01                |
| 205263_at        | BCL10          | 7.49E-03                 | 2.27                 |
| 223057_s_at      | XPO5           | 7.50E-03                 | 3.53                 |
| 233936_s_at      | GGNBP2         | 7.54E-03                 | 2.02                 |
| 204220_at        | GMFG           | 7.56E-03                 | -2.07                |
| 218578_at        | CDC73          | 7.58E-03                 | 2.33                 |
| 211767_at        | GINS4          | 7.61E-03                 | 9.63                 |
| 204282_s_at      | FARS2          | 7.65E-03                 | 2.20                 |
| 224723_x_at      | LOC401397      | 7.65E-03                 | 2.11                 |
| 202949_s_at      | FHL2           | 7.67E-03                 | -6.34                |
| 214022_s_at      | IFITM1         | 7.67E-03                 | -5.01                |
| 203428_s_at      | ASF1A          | 7.68E-03                 | 3.20                 |
| 209736_at        | SOX13          | 7.68E-03                 | 7.98                 |
| 227647_at        | KCNE3          | 7.68E-03                 | 2.24                 |
| 219014_at        | PLAC8          | 7.69E-03                 | -15.03               |
| 209035_at        | MDK            | 7.75E-03                 | 7.68                 |
| 224396_s_at      | ASPN           | 7.76E-03                 | -2.41                |
| 232145_at        | C2orf68        | 7.79E-03                 | 2.20                 |
| 211696_x_at      | HBB            | 7.85E-03                 | -14.30               |
| 211896_s_at      | DCN            | 7.86E-03                 | -17.02               |
| 223381_at        | NUF2           | 7.87E-03                 | 27.25                |
| 230006_s_at      | SVIP           | 7.92E-03                 | 2.53                 |
| 208837_at        | TMED3          | 7.94E-03                 | 2.89                 |
| 209071_s_at      | RGS5           | 7.95E-03                 | 6.82                 |
| 216594_x_at      | AKR1C1         | 8.03E-03                 | 2.58                 |
| 208697_s_at      | EIF3E          | 8.05E-03                 | 2.40                 |
| 209655_s_at      | TMEM47         | 8.05E-03                 | -3.30                |
| 205892_s_at      | FABP1          | 8.11E-03                 | -2.63                |
| 218350_s_at      | GMNN           | 8.11E-03                 | 6.60                 |
| 227679_at        | HDAC11         | 8.11E-03                 | 2.53                 |
| 210466_s_at      | SERBP1         | 8.13E-03                 | 2.72                 |
| 201983_s_at      | EGFR           | 8.14E-03                 | -2.64                |
| 238791_at        | ZNF100         | 8.20E-03                 | 2.67                 |
| 226302_at        | ATP8B1         | 8.25E-03                 | 4.63                 |
| 214264_s_at      | C14orf143      | 8.36E-03                 | 3.77                 |
| 201157_s_at      | NMT1           | 8.41E-03                 | 2.45                 |
| 218061_at        | MEA1           | 8.41E-03                 | 3.91                 |
| 209220_at        | GPC3           | 8.44E-03                 | 21.78                |
| 232449_at        | BCO2           | 8.44E-03                 | -11.63               |
| 214180_at        | MAN1C1         | 8.46E-03                 | -3.06                |
| 202154_x_at      | TUBB3          | 8.48E-03                 | 2.60                 |
| 201531_at        | ZFP36          | 8.49E-03                 | -7.48                |
| 225026_at        | CHD6           | 8.52E-03                 | 2.26                 |
| 215773_x_at      | PARP2          | 8.53E-03                 | 2.60                 |
| 48580_at         | CXXC1          | 8.54E-03                 | 2.21                 |
| 203545_at        | ALG8           | 8.55E-03                 | 2.25                 |
| 235670_at        | STX11          | 8.55E-03                 | -2.31                |
| 230326_s_at      | C11orf73       | 8.58E-03                 | 2.02                 |
| 220491_at        | HAMP           | 8.61E-03                 | -51.25               |

| Affy<br>Probe ID | Gene<br>Symbol | Paired T-test<br>p-value | Fold Change<br>T / N |
|------------------|----------------|--------------------------|----------------------|
| 213095_x_at      | AIF1           | 8.70E-03                 | -2.17                |
| 217834_s_at      | SYNCRIP        | 8.72E-03                 | 3.22                 |
| 211773_s_at      | ZKSCAN3        | 8.74E-03                 | 2.61                 |
| 213595_s_at      | CDC42BPA       | 8.74E-03                 | 3.47                 |
| 217786_at        | PRMT5          | 8.75E-03                 | 2.17                 |
| 1564520_s_at     | PRMT5          | 8.83E-03                 | 3.48                 |
| 224169_at        | NPFFR2         | 8.85E-03                 | 40.05                |
| 1565681_s_at     | DIP2C          | 8.88E-03                 | -2.94                |
| 217234_s_at      | EZR            | 8.88E-03                 | -2.22                |
| 218415_at        | VPS33B         | 8.90E-03                 | 2.07                 |
| 200027_at        | NARS           | 9.01E-03                 | 3.12                 |
| 201327_s_at      | CCT6A          | 9.02E-03                 | 3.10                 |
| 224452_s_at      | C7orf70        | 9.03E-03                 | 2.51                 |
| 209927_s_at      | C1orf77        | 9.15E-03                 | 3.01                 |
| 211992_at        | WNK1           | 9.15E-03                 | 3.12                 |
| 218636_s_at      | MAN1B1         | 9.19E-03                 | 2.21                 |
| 238004_at        | PGBD2          | 9.20E-03                 | 2.26                 |
| 227654_at        | FAM65C         | 9.23E-03                 | -9.56                |
| 241224_x_at      | DSCR8          | 9.24E-03                 | 61.65                |
| 218039_at        | NUSAP1         | 9.26E-03                 | 7.12                 |
| 57539_at         | ZGPAT          | 9.27E-03                 | -3.10                |
| 203593_at        | CD2AP          | 9.29E-03                 | 2.32                 |
| 224747_at        | UBE2Q2         | 9.33E-03                 | 2.29                 |
| 209960_at        | HGF            | 9.34E-03                 | -7.62                |
| 213293_s_at      | TRIM22         | 9.34E-03                 | -6.67                |
| 204912_at        | IL10RA         | 9.37E-03                 | -2.96                |
| 207253_s_at      | UBN1           | 9.39E-03                 | 3.09                 |
| 209627_s_at      | OSBPL3         | 9.43E-03                 | 6.17                 |
| 203547_at        | CD4            | 9.44E-03                 | -4.30                |
| 53071_s_at       | C17orf101      | 9.44E-03                 | 2.06                 |
| 230550_at        | MS4A6A         | 9.47E-03                 | -3.91                |
| 219666_at        | MS4A6A         | 9.48E-03                 | -3.63                |
| 213351_s_at      | TMCC1          | 9.49E-03                 | 2.26                 |
| 219870_at        | ATF7IP2        | 9.49E-03                 | 2.63                 |
| 203726_s_at      | LAMA3          | 9.56E-03                 | 9.92                 |
| 224748_at        | DCAF7          | 9.58E-03                 | 2.49                 |
| 201890_at        | RRM2           | 9.59E-03                 | 20.25                |
| 229465_s_at      | PTPRS          | 9.60E-03                 | -4.71                |
| 224972_at        | ROMO1          | 9.61E-03                 | 3.04                 |
| 204752_x_at      | PARP2          | 9.63E-03                 | 2.81                 |
| 209408_at        | KIF2C          | 9.64E-03                 | 8.68                 |
| 200889_s_at      | SSR1           | 9.66E-03                 | 2.74                 |
| 221488_s_at      | CUTA           | 9.67E-03                 | 2.11                 |
| 232843_s_at      | DOCK8          | 9.70E-03                 | -2.49                |
| 210253_at        | HTATIP2        | 9.78E-03                 | 3.58                 |
| 219640_at        | CLDN15         | 9.82E-03                 | 5.41                 |
| 225933_at        | CCDC137        | 9.82E-03                 | 5.20                 |
| 1567214_a_at     | PNN            | 9.86E-03                 | 2.07                 |
| 219777_at        | GIMAP6         | 9.86E-03                 | -2.13                |
| 202187_s_at      | PPP2R5A        | 9.88E-03                 | 2.36                 |
| 224815_at        | COMMD7         | 9.90E-03                 | 2.54                 |
| 228088_at        | SESTD1         | 9.91E-03                 | 2.31                 |
| 235542_at        | TET3           | 9.91E-03                 | 2.04                 |
| 205017_s_at      | MBNL2          | 9.93E-03                 | -2.67                |
| 214220_s_at      | ALMS1          | 9.95E-03                 | 3.95                 |
| 208979_at        | NCOA6          | 9.96E-03                 | 2.49                 |
| 233842_x_at      | C20orf43       | 9.97E-03                 | 2.12                 |
| 225068_at        | KLHL12         | 9.98E-03                 | 2.50                 |
| 223229_at        | UBE2T          | 1.00E-02                 | 13.00                |
| 212856_at        | GRAMD4         | 1.01E-02                 | -2.94                |
| 214710_s_at      | CCNB1          | 1.01E-02                 | 13.97                |
| 216237_s_at      | MCM5           | 1.01E-02                 | 3.53                 |
| 223502_s_at      | TNFSF13B       | 1.01E-02                 | -2.47                |
| 227001_at        | NIPAL2         | 1.01E-02                 | 3.59                 |
| 209276_s_at      | GLRX           | 1.03E-02                 | -2.71                |
| 212568_s_at      | DLAT           | 1.03E-02                 | 3.84                 |
| 226087_at        | LZIC           | 1.03E-02                 | 2.94                 |
| 202591_s_at      | SSBP1          | 1.04E-02                 | 2.26                 |
| 213988_s_at      | SAT1           | 1.04E-02                 | -5.56                |
| 217815_at        | SUPT16H        | 1.04E-02                 | 2.26                 |
| 222105_s_at      | NKIRAS2        | 1.04E-02                 | 3.17                 |

| Affy<br>Probe ID | Gene<br>Symbol | Paired T-test<br>p-value | Fold Change<br>T / N |
|------------------|----------------|--------------------------|----------------------|
| 225929_s_at      | RNF213         | 1.04E-02                 | 2.60                 |
| 203291_at        | CNOT4          | 1.05E-02                 | 2.75                 |
| 214086_s_at      | PARP2          | 1.05E-02                 | 3.63                 |
| 218137_s_at      | SMAP1          | 1.05E-02                 | 2.20                 |
| 228488_at        | TBC1D16        | 1.05E-02                 | 3.03                 |
| 201464_x_at      | JUN            | 1.06E-02                 | -2.22                |
| 203095_at        | MTIF2          | 1.06E-02                 | 2.36                 |
| 203888_at        | THBD           | 1.06E-02                 | -3.63                |
| 215690_x_at      | GPAA1          | 1.06E-02                 | 3.40                 |
| 217918_at        | DYNLRB1        | 1.06E-02                 | 2.72                 |
| 223526_at        | C18orf21       | 1.06E-02                 | 2.83                 |
| 232136_s_at      | CTTNBP2        | 1.06E-02                 | -12.11               |
| 1560469_at       | NR5A2          | 1.07E-02                 | -4.07                |
| 224217_s_at      | FAF1           | 1.07E-02                 | 2.66                 |
| 226536_at        | NSMCE2         | 1.07E-02                 | 2.73                 |
| 36865_at         | ANGEL1         | 1.07E-02                 | 2.19                 |
| 1557754_at       | LOC401068      | 1.08E-02                 | 7.61                 |
| 202326_at        | EHMT2          | 1.08E-02                 | 4.76                 |
| 202715_at        | CAD            | 1.08E-02                 | 2.20                 |
| 205357_s_at      | AGTR1          | 1.09E-02                 | -3.58                |
| 209795_at        | CD69           | 1.09E-02                 | -7.59                |
| 211610_at        | KLF6           | 1.09E-02                 | -2.08                |
| 218710_at        | TTC27          | 1.09E-02                 | 2.43                 |
| 202237_at        | NNMT           | 1.10E-02                 | -32.92               |
| 224963_at        | SLC26A2        | 1.10E-02                 | 2.27                 |
| 225083_at        | GTF3C6         | 1.10E-02                 | 2.10                 |
| 225477_s_at      | NR2C2          | 1.10E-02                 | 2.21                 |
| 204563_at        | SELL           | 1.11E-02                 | -3.42                |
| 208926_at        | NEU1           | 1.11E-02                 | 2.67                 |
| 209070_s_at      | RGS5           | 1.11E-02                 | 4.75                 |
| 211714_x_at      | TUBB           | 1.11E-02                 | 2.49                 |
| 212094_at        | PEG10          | 1.11E-02                 | 29.31                |
| 218543_s_at      | PARP12         | 1.11E-02                 | 2.96                 |
| 1557080_s_at     | ITGBL1         | 1.12E-02                 | -2.68                |
| 203068_at        | KLHL21         | 1.12E-02                 | 2.28                 |
| 223163_s_at      | ZC3HC1         | 1.12E-02                 | 3.01                 |
| 229937_x_at      | LILRB1         | 1.12E-02                 | -2.14                |
| 238974_at        | C2orf69        | 1.12E-02                 | 2.05                 |
| 202347_s_at      | UBE2K          | 1.13E-02                 | 2.67                 |
| 202992_at        | C7             | 1.13E-02                 | -13.27               |
| 209189_at        | FOS            | 1.13E-02                 | -28.38               |
| 213049_at        | GARNL1         | 1.13E-02                 | 2.03                 |
| 202487_s_at      | H2AFV          | 1.14E-02                 | 2.45                 |
| 219935_at        | ADAMTS5        | 1.14E-02                 | 2.40                 |
| 222906_at        | FLVCR1         | 1.14E-02                 | 2.35                 |
| 223056_s_at      | XPO5           | 1.15E-02                 | 3.32                 |
| 203310_at        | STXBP3         | 1.16E-02                 | 2.14                 |
| 207687_at        | INHBC          | 1.16E-02                 | -3.73                |
| 214642_x_at      | MAGEA5         | 1.16E-02                 | 27.23                |
| 1553296_at       | GPR128         | 1.17E-02                 | -4.69                |
| 205220_at        | NIACR2         | 1.18E-02                 | -2.51                |
| 218504_at        | FAHD2A         | 1.18E-02                 | -2.19                |
| 224985_at        | NRAS           | 1.18E-02                 | 2.62                 |
| 210720_s_at      | NECAB3         | 1.19E-02                 | 6.11                 |
| 212857_x_at      | SUB1           | 1.19E-02                 | 2.80                 |
| 223274_at        | TCF19          | 1.19E-02                 | 5.15                 |
| 225297_at        | HAUS1          | 1.19E-02                 | 3.14                 |
| 225851_at        | FNTB           | 1.19E-02                 | 2.31                 |
| 202635_s_at      | POLR2K         | 1.20E-02                 | 3.37                 |
| 212063_at        | CD44           | 1.20E-02                 | -2.77                |
| 226792_s_at      | KIFC2          | 1.20E-02                 | 3.71                 |
| 1557905_s_at     | CD44           | 1.21E-02                 | -2.24                |
| 201539_s_at      | FHL1           | 1.21E-02                 | -2.39                |
| 210054_at        | HAUS3          | 1.21E-02                 | 2.07                 |
| 218983_at        | C1RL           | 1.21E-02                 | -3.15                |
| 219610_at        | RGNEF          | 1.21E-02                 | 3.40                 |
| 200744_s_at      | GNB1           | 1.22E-02                 | 2.46                 |
| 226414_s_at      | ANAPC11        | 1.22E-02                 | 2.89                 |
| 202705_at        | CCNB2          | 1.23E-02                 | 25.79                |
| 203960_s_at      | HSPB11         | 1.23E-02                 | 2.30                 |
| 204142_at        | ENOSF1         | 1.24E-02                 | 4.63                 |

| Affy<br>Probe ID | Gene<br>Symbol | Paired T-test<br>p-value | Fold Change<br>T / N |
|------------------|----------------|--------------------------|----------------------|
| 211060_x_at      | GPAA1          | 1.24E-02                 | 3.33                 |
| 218541_s_at      | C8orf4         | 1.24E-02                 | -9.67                |
| 238581_at        | GBP5           | 1.24E-02                 | -3.44                |
| 243539_at        | KIAA1841       | 1.24E-02                 | 2.07                 |
| 47608_at         | TJAP1          | 1.24E-02                 | 2.56                 |
| 214960_at        | API5           | 1.25E-02                 | 2.11                 |
| 225689_at        | C3orf39        | 1.25E-02                 | 2.66                 |
| 227530_at        | AKAP12         | 1.25E-02                 | -6.53                |
| 228596_at        | LOC728377      | 1.25E-02                 | 2.40                 |
| 203519_s_at      | UPF2           | 1.26E-02                 | 2.30                 |
| 208079_s_at      | AURKA          | 1.26E-02                 | 5.43                 |
| 213194_at        | ROBO1          | 1.26E-02                 | 17.08                |
| 217919_s_at      | MRPL42         | 1.26E-02                 | 2.47                 |
| 218683_at        | PTBP2          | 1.26E-02                 | 2.71                 |
| 218858_at        | DEPDC6         | 1.26E-02                 | 3.44                 |
| 231845_at        | AARS2          | 1.26E-02                 | 4.23                 |
| 202232_s_at      | EIF3M          | 1.27E-02                 | 2.29                 |
| 213068_at        | DPT            | 1.27E-02                 | -6.10                |
| 212556_at        | SCRIB          | 1.28E-02                 | 4.26                 |
| 225557_at        | CSRNP1         | 1.28E-02                 | -3.90                |
| 226001_at        | KLHL5          | 1.28E-02                 | 2.40                 |
| 215108_x_at      | TOX3           | 1.29E-02                 | 3.35                 |
| 218405_at        | ABT1           | 1.29E-02                 | 2.22                 |
| 223053_x_at      | SSU72          | 1.29E-02                 | 2.27                 |
| 235158_at        | TMEM209        | 1.29E-02                 | 2.03                 |
| 202295_s_at      | CTSH           | 1.30E-02                 | 2.29                 |
| 217856_at        | RBM8A          | 1.30E-02                 | -2.20                |
| 218991_at        | HEATR6         | 1.30E-02                 | 6.90                 |
| 220801_s_at      | HAO2           | 1.30E-02                 | -9.18                |
| 1568638_a_at     | IDO2           | 1.31E-02                 | -15.94               |
| 203270_at        | DTYMK          | 1.31E-02                 | 3.02                 |
| 209572_s_at      | EED            | 1.31E-02                 | 2.65                 |
| 212659_s_at      | IL1RN          | 1.31E-02                 | -2.42                |
| 226269_at        | GDAP1          | 1.31E-02                 | 4.21                 |
| 238214_at        | LRRRC69        | 1.31E-02                 | 4.56                 |
| 202998_s_at      | LOXL2          | 1.32E-02                 | 2.32                 |
| 204740_at        | CNKSR1         | 1.32E-02                 | 3.90                 |
| 206350_at        | APCS           | 1.32E-02                 | -15.63               |
| 224560_at        | TIMP2          | 1.32E-02                 | -3.68                |
| 225102_at        | MGLL           | 1.32E-02                 | -2.38                |
| 228648_at        | LRG1           | 1.33E-02                 | -8.00                |
| 212687_at        | LIMS1          | 1.34E-02                 | 2.14                 |
| 222162_s_at      | ADAMTS1        | 1.34E-02                 | -4.34                |
| 210467_x_at      | MAGEA12        | 1.35E-02                 | 230.75               |
| 221970_s_at      | NOL11          | 1.35E-02                 | 2.33                 |
| 243916_x_at      | UBLCP1         | 1.35E-02                 | 2.17                 |
| 201644_at        | TSTA3          | 1.36E-02                 | 2.65                 |
| 204306_s_at      | CD151          | 1.37E-02                 | 2.32                 |
| 204587_at        | SLC25A14       | 1.37E-02                 | 2.20                 |
| 206613_s_at      | TAF1A          | 1.37E-02                 | 3.56                 |
| 207556_s_at      | DGKZ           | 1.37E-02                 | 2.17                 |
| 209132_s_at      | COMMD4         | 1.37E-02                 | 2.83                 |
| 224497_x_at      | HSD17B14       | 1.37E-02                 | 2.79                 |
| 226813_at        | C1orf57        | 1.37E-02                 | 2.51                 |
| 219402_s_at      | DERL1          | 1.38E-02                 | 2.57                 |
| 234726_s_at      | TMEM168        | 1.38E-02                 | 2.03                 |
| 220206_at        | ZMYM1          | 1.39E-02                 | 4.00                 |
| 232224_at        | MASP1          | 1.39E-02                 | -5.96                |
| 201323_at        | EBNA1BP2       | 1.40E-02                 | 2.36                 |
| 205237_at        | FCN1           | 1.40E-02                 | -3.01                |
| 222551_s_at      | C8orf33        | 1.40E-02                 | 2.54                 |
| 223620_at        | GPR34          | 1.41E-02                 | -2.01                |
| 201060_x_at      | STOM           | 1.42E-02                 | -5.49                |
| 229353_s_at      | NUCKS1         | 1.42E-02                 | 2.79                 |
| 1559577_at       | FCN2           | 1.43E-02                 | -56.95               |
| 209614_at        | ADH1B          | 1.43E-02                 | -19.91               |
| 218940_at        | C14orf138      | 1.43E-02                 | 2.08                 |
| 222740_at        | ATAD2          | 1.43E-02                 | 4.33                 |
| 230120_s_at      | PLGLB2         | 1.43E-02                 | -9.51                |
| 203040_s_at      | HMBS           | 1.44E-02                 | 2.01                 |
| 204962_s_at      | CENPA          | 1.44E-02                 | 19.33                |

| Affy<br>Probe ID | Gene<br>Symbol | Paired T-test<br>p-value | Fold Change<br>T / N |
|------------------|----------------|--------------------------|----------------------|
| 210125_s_at      | BANF1          | 1.44E-02                 | 2.27                 |
| 222218_s_at      | PILRA          | 1.44E-02                 | -2.15                |
| 230032_at        | OSGEPL1        | 1.44E-02                 | 2.05                 |
| 201068_s_at      | PSMC2          | 1.45E-02                 | 2.31                 |
| 215088_s_at      | SDHC           | 1.45E-02                 | 2.20                 |
| 218062_x_at      | CDC42EP4       | 1.45E-02                 | 2.80                 |
| 222433_at        | ENAH           | 1.45E-02                 | 6.08                 |
| 227657_at        | RNF150         | 1.45E-02                 | -16.23               |
| 236313_at        | CDKN2B         | 1.45E-02                 | 4.48                 |
| 1554459_s_at     | CFHR3          | 1.46E-02                 | -29.45               |
| 218988_at        | SLC35E3        | 1.46E-02                 | 2.20                 |
| 221268_s_at      | SGPP1          | 1.46E-02                 | -2.79                |
| 223979_x_at      | FTCD           | 1.46E-02                 | -3.68                |
| 224988_at        | C6orf89        | 1.46E-02                 | 2.34                 |
| 235125_x_at      | FAM73A         | 1.46E-02                 | 2.34                 |
| 1552621_at       | POLR2J2        | 1.47E-02                 | 2.17                 |
| 242945_at        | FAM20A         | 1.47E-02                 | -3.49                |
| 211742_s_at      | EVI2B          | 1.48E-02                 | -2.79                |
| 1555759_a_at     | CCL5           | 1.49E-02                 | -3.42                |
| 201282_at        | OGDH           | 1.50E-02                 | 2.32                 |
| 203473_at        | SLCO2B1        | 1.50E-02                 | -3.02                |
| 214100_x_at      | NSUN5B         | 1.50E-02                 | 3.01                 |
| 218187_s_at      | C8orf33        | 1.50E-02                 | 3.45                 |
| 202259_s_at      | N4BP2L2        | 1.51E-02                 | -2.56                |
| 214435_x_at      | RALA           | 1.51E-02                 | 5.14                 |
| 219343_at        | CDC37L1        | 1.51E-02                 | -5.65                |
| 1554974_at       | ACY3           | 1.52E-02                 | -2.14                |
| 226031_at        | CCDC132        | 1.52E-02                 | 2.44                 |
| 204057_at        | IRF8           | 1.53E-02                 | -3.68                |
| 213072_at        | CYHR1          | 1.53E-02                 | 2.23                 |
| 213599_at        | OIP5           | 1.53E-02                 | 13.81                |
| 215506_s_at      | DIRAS3         | 1.53E-02                 | -5.31                |
| 222713_s_at      | FANCF          | 1.53E-02                 | 2.16                 |
| 227561_at        | DDR2           | 1.53E-02                 | -2.04                |
| 204175_at        | ZNF593         | 1.54E-02                 | 2.24                 |
| 213631_x_at      | DHODH          | 1.54E-02                 | -4.16                |
| 214474_at        | PRKAB2         | 1.54E-02                 | 3.90                 |
| 215617_at        | SPATS2L        | 1.54E-02                 | -3.06                |
| 221797_at        | C17orf90       | 1.54E-02                 | 3.03                 |
| 201291_s_at      | TOP2A          | 1.55E-02                 | 37.72                |
| 203076_s_at      | SMAD2          | 1.55E-02                 | 2.67                 |
| 205063_at        | SIP1           | 1.55E-02                 | 2.47                 |
| 217561_at        | CALCA          | 1.55E-02                 | -6.47                |
| 219918_s_at      | ASPM           | 1.55E-02                 | 33.83                |
| 225114_at        | AGPS           | 1.55E-02                 | 2.25                 |
| 203625_x_at      | SKP2           | 1.56E-02                 | 3.32                 |
| 209820_s_at      | TBL3           | 1.56E-02                 | 2.05                 |
| 227968_at        | PDDC1          | 1.56E-02                 | 2.16                 |
| 201397_at        | PHGDH          | 1.57E-02                 | -5.05                |
| 201930_at        | MCM6           | 1.57E-02                 | 3.92                 |
| 202666_s_at      | ACTL6A         | 1.57E-02                 | 2.51                 |
| 202870_s_at      | CDC20          | 1.57E-02                 | 66.37                |
| 206626_x_at      | SSX1           | 1.57E-02                 | 130.08               |
| 211150_s_at      | DLAT           | 1.57E-02                 | 3.83                 |
| 223844_at        | ADAMTS13       | 1.57E-02                 | -6.11                |
| 225931_s_at      | RNF213         | 1.57E-02                 | 3.29                 |
| 227594_at        | ZMYM6          | 1.57E-02                 | 2.76                 |
| 205943_at        | TDO2           | 1.58E-02                 | -4.31                |
| 227055_at        | METTL7B        | 1.58E-02                 | -2.34                |
| 229232_at        | LRRC57         | 1.58E-02                 | 3.15                 |
| 36936_at         | TSTA3          | 1.58E-02                 | 3.06                 |
| 46167_at         | TTC4           | 1.58E-02                 | 2.51                 |
| 203015_s_at      | SSX2IP         | 1.59E-02                 | 3.25                 |
| 213007_at        | FANCI          | 1.59E-02                 | 3.53                 |
| 1554588_a_at     | TTC30B         | 1.60E-02                 | 2.89                 |
| 202686_s_at      | AXL            | 1.60E-02                 | -3.83                |
| 219819_s_at      | MRPS28         | 1.60E-02                 | 2.04                 |
| 227370_at        | FAM171B        | 1.60E-02                 | 2.61                 |
| 205119_s_at      | FPR1           | 1.61E-02                 | -4.55                |
| 213043_s_at      | MED24          | 1.61E-02                 | 3.79                 |
| 223699_at        | CNDP1          | 1.61E-02                 | -125.52              |

| Affy<br>Probe ID | Gene<br>Symbol | Paired T-test<br>p-value | Fold Change<br>T / N |
|------------------|----------------|--------------------------|----------------------|
| 207165_at        | HMMR           | 1.62E-02                 | 56.87                |
| 209146_at        | SC4MOL         | 1.62E-02                 | -2.19                |
| 229831_at        | CNTN3          | 1.63E-02                 | -68.73               |
| 203061_s_at      | MDC1           | 1.64E-02                 | 2.17                 |
| 204204_at        | SLC31A2        | 1.64E-02                 | -2.30                |
| 209304_x_at      | GADD45B        | 1.64E-02                 | -18.38               |
| 225521_at        | ANAPC7         | 1.64E-02                 | 2.05                 |
| 226710_at        | C8orf82        | 1.64E-02                 | 2.69                 |
| 1557049_at       | LOC149478      | 1.65E-02                 | -5.42                |
| 204507_s_at      | PPP3R1         | 1.65E-02                 | 2.65                 |
| 207501_s_at      | FGF12          | 1.65E-02                 | 21.57                |
| 218564_at        | RFWD3          | 1.65E-02                 | 2.02                 |
| 203730_s_at      | ZKSCAN5        | 1.66E-02                 | 2.02                 |
| 204768_s_at      | FEN1           | 1.66E-02                 | 2.97                 |
| 204836_at        | GLDC           | 1.66E-02                 | -2.88                |
| 215440_s_at      | BEX4           | 1.66E-02                 | -2.06                |
| 215253_s_at      | RCAN1          | 1.67E-02                 | -4.53                |
| 44111_at         | VPS33B         | 1.67E-02                 | 2.23                 |
| 207325_x_at      | MAGEA1         | 1.68E-02                 | 68.40                |
| 225437_s_at      | C7orf27        | 1.68E-02                 | 2.40                 |
| 218079_s_at      | GGNBP2         | 1.69E-02                 | 2.00                 |
| 238447_at        | RBMS3          | 1.69E-02                 | -2.48                |
| 226705_at        | FGFR1          | 1.70E-02                 | -2.55                |
| 229144_at        | RP1-21O18.1    | 1.70E-02                 | -2.03                |
| 204472_at        | GEM            | 1.71E-02                 | -4.28                |
| 233604_at        | FLJ22763       | 1.71E-02                 | -10.37               |
| 236181_at        | LOC100132181   | 1.71E-02                 | 2.18                 |
| 213428_s_at      | COL6A1         | 1.72E-02                 | -3.53                |
| 215232_at        | RICH2          | 1.73E-02                 | 4.06                 |
| 223180_s_at      | C18orf55       | 1.73E-02                 | 2.18                 |
| 232520_s_at      | NSFL1C         | 1.73E-02                 | 2.52                 |
| 203415_at        | PDCD6          | 1.74E-02                 | 2.13                 |
| 205502_at        | CYP17A1        | 1.74E-02                 | 12.13                |
| 222654_at        | IMPAD1         | 1.74E-02                 | 2.73                 |
| 227567_at        | LOC651250      | 1.74E-02                 | 2.57                 |
| 238122_at        | RBM12B         | 1.74E-02                 | 3.33                 |
| 1555539_at       | SDS            | 1.75E-02                 | -20.23               |
| 202231_at        | EIF3M          | 1.75E-02                 | 2.00                 |
| 205984_at        | CRHBP          | 1.75E-02                 | -72.73               |
| 207104_x_at      | LILRB1         | 1.75E-02                 | -2.56                |
| 213149_at        | DLAT           | 1.75E-02                 | 3.11                 |
| 227256_at        | USP31          | 1.75E-02                 | 2.66                 |
| 203262_s_at      | FAM50A         | 1.76E-02                 | 2.88                 |
| 207513_s_at      | ZNF189         | 1.76E-02                 | 3.04                 |
| 207469_s_at      | PIR            | 1.77E-02                 | 4.18                 |
| 209925_at        | OCLN           | 1.77E-02                 | 3.52                 |
| 231838_at        | PABPC1L        | 1.77E-02                 | 2.55                 |
| 213608_s_at      | SRRD           | 1.78E-02                 | 2.05                 |
| 228135_at        | C1orf52        | 1.78E-02                 | 2.10                 |
| 228713_s_at      | HSD17B14       | 1.78E-02                 | 3.25                 |
| 207574_s_at      | GADD45B        | 1.79E-02                 | -13.26               |
| 208808_s_at      | HMGB2          | 1.79E-02                 | 3.80                 |
| 211737_x_at      | PTN            | 1.79E-02                 | -3.16                |
| 222883_at        | C1orf163       | 1.79E-02                 | 3.32                 |
| 225073_at        | PPHLN1         | 1.79E-02                 | 2.30                 |
| 225705_at        | CCDC45         | 1.79E-02                 | 2.07                 |
| 33736_at         | STOML1         | 1.79E-02                 | 3.06                 |
| 223839_s_at      | SCD            | 1.80E-02                 | 2.41                 |
| 203989_x_at      | F2R            | 1.81E-02                 | -2.54                |
| 204524_at        | PDPK1          | 1.81E-02                 | 2.20                 |
| 206688_s_at      | CPSF4          | 1.81E-02                 | 2.47                 |
| 212058_at        | SR140          | 1.81E-02                 | 2.36                 |
| 222291_at        | FAM149A        | 1.81E-02                 | -4.08                |
| 1560916_a_at     | DPY19L1        | 1.82E-02                 | 2.12                 |
| 202421_at        | IGSF3          | 1.82E-02                 | 8.02                 |
| 203192_at        | ABCB6          | 1.82E-02                 | 3.35                 |
| 209156_s_at      | COL6A2         | 1.82E-02                 | -2.55                |
| 219020_at        | HS1BP3         | 1.82E-02                 | 2.33                 |
| 203472_s_at      | SLCO2B1        | 1.83E-02                 | -2.39                |
| 213105_s_at      | C16orf42       | 1.83E-02                 | 2.86                 |
| 231307_at        | LOC100130725   | 1.83E-02                 | 19.81                |



| Affy<br>Probe ID | Gene<br>Symbol | Paired T-test<br>p-value | Fold Change<br>T / N |
|------------------|----------------|--------------------------|----------------------|
| 204121_at        | GADD45G        | 1.84E-02                 | -3.53                |
| 210997_at        | HGF            | 1.84E-02                 | -3.02                |
| 212449_s_at      | LYPLA1         | 1.84E-02                 | 2.18                 |
| 223054_at        | DNAJB11        | 1.84E-02                 | 2.19                 |
| 214715_x_at      | ZNF160         | 1.85E-02                 | 2.14                 |
| 213577_at        | SQLE           | 1.86E-02                 | 2.08                 |
| 225879_at        | TSEN54         | 1.86E-02                 | 2.86                 |
| 212871_at        | MAPKAPK5       | 1.87E-02                 | 2.34                 |
| 235405_at        | GSTA4          | 1.87E-02                 | 26.25                |
| 212852_s_at      | TROVE2         | 1.88E-02                 | 2.11                 |
| 1554899_s_at     | FCER1G         | 1.89E-02                 | -3.26                |
| 215380_s_at      | GGCT           | 1.89E-02                 | 2.42                 |
| 228357_at        | UNK            | 1.89E-02                 | 2.77                 |
| 208893_s_at      | DUSP6          | 1.90E-02                 | -7.19                |
| 224447_s_at      | C17orf37       | 1.90E-02                 | 2.92                 |
| 228941_at        | ALG10B         | 1.90E-02                 | 2.53                 |
| 202276_at        | SHFM1          | 1.91E-02                 | 2.71                 |
| 46323_at         | CANT1          | 1.91E-02                 | 3.38                 |
| 1568765_at       | SERPINE1       | 1.92E-02                 | -23.92               |
| 224479_s_at      | MRPL45         | 1.92E-02                 | 2.14                 |
| 225903_at        | PIGU           | 1.92E-02                 | 2.70                 |
| 201592_at        | EIF3H          | 1.93E-02                 | 2.94                 |
| 204208_at        | RNGTT          | 1.93E-02                 | 2.93                 |
| 223721_s_at      | DNAJC12        | 1.93E-02                 | -89.96               |
| 210095_s_at      | IGFBP3         | 1.94E-02                 | -8.37                |
| 218549_s_at      | FAM82B         | 1.94E-02                 | 2.51                 |
| 209358_at        | TAF11          | 1.95E-02                 | 2.05                 |
| 225056_at        | SIPA1L2        | 1.95E-02                 | 3.10                 |
| 201471_s_at      | SQSTM1         | 1.96E-02                 | 3.58                 |
| 203973_s_at      | CEBPD          | 1.96E-02                 | -2.41                |
| 204127_at        | RFC3           | 1.96E-02                 | 3.20                 |
| 213093_at        | PRKCA          | 1.96E-02                 | 2.25                 |
| 223133_at        | TMEM14B        | 1.96E-02                 | 2.63                 |
| 225600_at        | C8orf83        | 1.96E-02                 | 2.90                 |
| 228095_at        | PHF14          | 1.96E-02                 | 3.14                 |
| 235443_at        | LOC100131067   | 1.96E-02                 | 3.09                 |
| 201325_s_at      | EMP1           | 1.97E-02                 | -2.44                |
| 207027_at        | HGFAC          | 1.97E-02                 | -24.49               |
| 208726_s_at      | EIF2S2         | 1.97E-02                 | 2.12                 |
| 210497_x_at      | SSX2           | 1.97E-02                 | 136.78               |
| 219007_at        | NUP43          | 1.97E-02                 | 2.99                 |
| 219681_s_at      | RAB11FIP1      | 1.97E-02                 | 5.43                 |
| 221011_s_at      | LBH            | 1.97E-02                 | -2.40                |
| 37278_at         | TAZ            | 1.97E-02                 | 2.53                 |
| 204835_at        | POLA1          | 1.98E-02                 | 7.26                 |
| 206324_s_at      | DAPK2          | 1.98E-02                 | 8.59                 |
| 218795_at        | ACP6           | 1.98E-02                 | 2.21                 |
| 219494_at        | RAD54B         | 1.98E-02                 | 6.86                 |
| 220668_s_at      | DNMT3B         | 1.98E-02                 | 4.69                 |
| 202672_s_at      | ATF3           | 1.99E-02                 | -3.94                |
| 218797_s_at      | SIRT7          | 1.99E-02                 | 3.10                 |
| 227722_at        | RPS23          | 1.99E-02                 | -2.24                |
| 202882_x_at      | NOL7           | 2.00E-02                 | 2.47                 |
| 204484_at        | PIK3C2B        | 2.00E-02                 | 3.16                 |
| 221984_s_at      | FAM134A        | 2.00E-02                 | 3.09                 |
| 224517_at        | POLR2J4        | 2.00E-02                 | 2.04                 |
| 204972_at        | OAS2           | 2.01E-02                 | -3.15                |
| 212265_at        | QKI            | 2.02E-02                 | 2.01                 |
| 216930_at        | HNF1A          | 2.02E-02                 | 2.90                 |
| 227099_s_at      | LOC387763      | 2.02E-02                 | -4.38                |
| 203385_at        | DGKA           | 2.03E-02                 | -2.37                |
| 205647_at        | RAD52          | 2.03E-02                 | 2.18                 |
| 213842_x_at      | NSUN5C         | 2.03E-02                 | 2.67                 |
| 218910_at        | ANO10          | 2.03E-02                 | 3.14                 |
| 218917_s_at      | ARID1A         | 2.03E-02                 | 2.91                 |
| 227937_at        | MYPOP          | 2.03E-02                 | 2.49                 |
| 200054_at        | ZNF259         | 2.04E-02                 | 3.33                 |
| 203931_s_at      | MRPL12         | 2.04E-02                 | 3.40                 |
| 208688_x_at      | EIF3B          | 2.04E-02                 | 2.69                 |
| 226319_s_at      | THOC4          | 2.04E-02                 | 2.75                 |
| 227353_at        | TMC8           | 2.04E-02                 | -2.97                |

| Affy<br>Probe ID | Gene<br>Symbol | Paired T-test<br>p-value | Fold Change<br>T / N |
|------------------|----------------|--------------------------|----------------------|
| 207855_s_at      | CLCC1          | 2.05E-02                 | 2.43                 |
| 203837_at        | MAP3K5         | 2.06E-02                 | -2.92                |
| 219428_s_at      | PXMP4          | 2.06E-02                 | 3.10                 |
| 201349_at        | SLC9A3R1       | 2.07E-02                 | 2.29                 |
| 203448_s_at      | TERF1          | 2.07E-02                 | 2.31                 |
| 209912_s_at      | KIAA0415       | 2.07E-02                 | 3.03                 |
| 221060_s_at      | TLR4           | 2.07E-02                 | -3.59                |
| 205530_at        | ETFDH          | 2.08E-02                 | -2.08                |
| 209942_x_at      | MAGEA3         | 2.08E-02                 | 88.28                |
| 223961_s_at      | CISH           | 2.08E-02                 | -4.33                |
| 203462_x_at      | EIF3B          | 2.09E-02                 | 2.62                 |
| 211971_s_at      | LRPPRC         | 2.09E-02                 | 2.24                 |
| 212921_at        | SMYD2          | 2.09E-02                 | 3.29                 |
| 223167_s_at      | USP25          | 2.09E-02                 | -2.47                |
| 44673_at         | SIGLEC1        | 2.09E-02                 | -2.48                |
| 205089_at        | ZNF7           | 2.10E-02                 | 2.13                 |
| 205649_s_at      | FGA            | 2.10E-02                 | -5.18                |
| 218228_s_at      | TNKS2          | 2.10E-02                 | -2.99                |
| 203738_at        | C5orf22        | 2.11E-02                 | 2.32                 |
| 209484_s_at      | NSL1           | 2.11E-02                 | 2.26                 |
| 210233_at        | IL1RAP         | 2.11E-02                 | -18.56               |
| 230238_at        | ANKRD43        | 2.11E-02                 | 5.44                 |
| 1555964_at       | ARL17P1        | 2.12E-02                 | 5.46                 |
| 201858_s_at      | SRGN           | 2.12E-02                 | -5.16                |
| 220607_x_at      | TH1L           | 2.12E-02                 | 2.10                 |
| 225955_at        | METRNL         | 2.12E-02                 | -2.43                |
| 226670_s_at      | PABPC1L        | 2.12E-02                 | 2.32                 |
| 201508_at        | IGFBP4         | 2.13E-02                 | -2.13                |
| 207666_x_at      | SSX3           | 2.13E-02                 | 88.18                |
| 212327_at        | LIMCH1         | 2.13E-02                 | -2.30                |
| 64486_at         | CORO1B         | 2.13E-02                 | 2.16                 |
| 216471_x_at      | SSX2           | 2.14E-02                 | 107.52               |
| 231984_at        | MTAP           | 2.14E-02                 | -2.06                |
| 201956_s_at      | GNPAT          | 2.15E-02                 | 3.56                 |
| 208393_s_at      | RAD50          | 2.15E-02                 | 2.09                 |
| 209577_at        | PCYT2          | 2.15E-02                 | 2.90                 |
| 224061_at        | INMT           | 2.15E-02                 | -13.39               |
| 201745_at        | TWF1           | 2.16E-02                 | 2.02                 |
| 219873_at        | COLEC11        | 2.16E-02                 | -3.34                |
| 223234_at        | MAD2L2         | 2.16E-02                 | 2.52                 |
| 205819_at        | MARCO          | 2.17E-02                 | -49.84               |
| 206618_at        | IL18R1         | 2.17E-02                 | -3.27                |
| 214721_x_at      | CDC42EP4       | 2.17E-02                 | 3.28                 |
| 219990_at        | E2F8           | 2.17E-02                 | 17.52                |
| 222550_at        | ARMC1          | 2.17E-02                 | 2.19                 |
| 226778_at        | C8orf42        | 2.17E-02                 | -2.93                |
| 231270_at        | CA13           | 2.17E-02                 | -2.29                |
| 223363_at        | PSMG3          | 2.18E-02                 | 3.32                 |
| 232068_s_at      | TLR4           | 2.18E-02                 | -2.76                |
| 235119_at        | TAF3           | 2.18E-02                 | 2.77                 |
| 203249_at        | EZH1           | 2.19E-02                 | 2.36                 |
| 218788_s_at      | SMYD3          | 2.19E-02                 | 3.52                 |
| 227255_at        | PDIK1L         | 2.19E-02                 | 2.24                 |
| 201177_s_at      | UBA2           | 2.20E-02                 | 2.16                 |
| 203211_s_at      | MTMR2          | 2.20E-02                 | 2.98                 |
| 205851_at        | NME6           | 2.20E-02                 | 2.11                 |
| 219362_at        | MAK10          | 2.20E-02                 | 2.68                 |
| 219526_at        | C14orf169      | 2.20E-02                 | 2.06                 |
| 201255_x_at      | BAT3           | 2.21E-02                 | 2.57                 |
| 203894_at        | TUBG2          | 2.21E-02                 | 3.19                 |
| 207981_s_at      | ESRRG          | 2.21E-02                 | -30.08               |
| 208906_at        | BSCL2          | 2.21E-02                 | 2.45                 |
| 209696_at        | FBP1           | 2.21E-02                 | -6.75                |
| 218002_s_at      | CXCL14         | 2.21E-02                 | -71.13               |
| 226939_at        | CPEB2          | 2.21E-02                 | 2.10                 |
| 200703_at        | DYNLL1         | 2.22E-02                 | 2.03                 |
| 205863_at        | S100A12        | 2.22E-02                 | -4.33                |
| 209196_at        | WDR46          | 2.22E-02                 | 2.89                 |
| 212828_at        | SYNJ2          | 2.22E-02                 | 2.15                 |
| 204011_at        | SPRY2          | 2.23E-02                 | -2.93                |
| 205395_s_at      | MRE11A         | 2.23E-02                 | 2.54                 |

| Affy<br>Probe ID | Gene<br>Symbol | Paired T-test<br>p-value | Fold Change<br>T / N |
|------------------|----------------|--------------------------|----------------------|
| 208034_s_at      | PROZ           | 2.23E-02                 | -5.56                |
| 209252_at        | HARS2          | 2.23E-02                 | 2.38                 |
| 212637_s_at      | WWP1           | 2.23E-02                 | 2.44                 |
| 223032_x_at      | PRELID1        | 2.23E-02                 | 2.73                 |
| 244313_at        | CR1            | 2.23E-02                 | -4.57                |
| 219862_s_at      | NARF           | 2.24E-02                 | 3.45                 |
| 223062_s_at      | PSAT1          | 2.24E-02                 | -4.56                |
| 235145_at        | ZBTB7B         | 2.24E-02                 | 2.31                 |
| 1554082_a_at     | NOL9           | 2.25E-02                 | 3.41                 |
| 200083_at        | USP22          | 2.25E-02                 | 2.58                 |
| 207238_s_at      | PTPRC          | 2.25E-02                 | -3.95                |
| 218482_at        | ENY2           | 2.25E-02                 | 2.57                 |
| 224726_at        | MIB1           | 2.25E-02                 | 3.67                 |
| 203658_at        | SLC25A20       | 2.26E-02                 | -3.10                |
| 212657_s_at      | IL1RN          | 2.26E-02                 | -4.20                |
| 215470_at        | GTF2H2B        | 2.26E-02                 | 2.47                 |
| 218757_s_at      | UPF3B          | 2.26E-02                 | 2.51                 |
| 223029_s_at      | TRAF7          | 2.26E-02                 | 2.39                 |
| 228729_at        | CCNB1          | 2.26E-02                 | 14.45                |
| 233637_at        | DCAF8          | 2.26E-02                 | 2.27                 |
| 202376_at        | SERPINA3       | 2.27E-02                 | -4.88                |
| 202391_at        | BASP1          | 2.27E-02                 | -4.09                |
| 205054_at        | NEB            | 2.27E-02                 | 10.42                |
| 209685_s_at      | PRKCB          | 2.27E-02                 | -3.23                |
| 210293_s_at      | SEC23B         | 2.27E-02                 | 2.31                 |
| 244132_x_at      | ZNF518A        | 2.27E-02                 | 3.69                 |
| 50374_at         | C17orf90       | 2.27E-02                 | 3.47                 |
| 212917_x_at      | RECQL          | 2.28E-02                 | 2.18                 |
| 223173_at        | SPNS1          | 2.28E-02                 | 2.63                 |
| 227012_at        | SLC25A40       | 2.28E-02                 | 2.43                 |
| 228050_at        | UTP15          | 2.28E-02                 | 2.84                 |
| 229560_at        | TLR8           | 2.28E-02                 | -2.31                |
| 231691_at        | C3P1           | 2.28E-02                 | -13.74               |
| 212645_x_at      | BRE            | 2.29E-02                 | 2.21                 |
| 222958_s_at      | DEPDC1         | 2.30E-02                 | 11.34                |
| 226791_at        | KIFC2          | 2.30E-02                 | 3.56                 |
| 228397_at        | TUG1           | 2.30E-02                 | 2.00                 |
| 1552280_at       | TIMD4          | 2.31E-02                 | -30.06               |
| 1553099_at       | TIGD1          | 2.31E-02                 | 2.45                 |
| 201091_s_at      | CBX3           | 2.31E-02                 | 2.51                 |
| 208805_at        | PSMA6          | 2.31E-02                 | 2.40                 |
| 212155_at        | RNF187         | 2.31E-02                 | 3.74                 |
| 218631_at        | AVP1           | 2.31E-02                 | -3.03                |
| 206380_s_at      | CFP            | 2.32E-02                 | -40.94               |
| 207697_x_at      | LILRB2         | 2.32E-02                 | -2.37                |
| 212526_at        | SPG20          | 2.32E-02                 | -3.28                |
| 235126_at        | LQK1           | 2.32E-02                 | 3.13                 |
| 200594_x_at      | HNRNPU         | 2.33E-02                 | 2.04                 |
| 203923_s_at      | CYBB           | 2.33E-02                 | -3.51                |
| 203802_x_at      | NSUN5          | 2.34E-02                 | 3.29                 |
| 209422_at        | PHF20          | 2.34E-02                 | 2.58                 |
| 209586_s_at      | PRUNE          | 2.34E-02                 | 4.21                 |
| 218921_at        | SIGIRR         | 2.34E-02                 | -4.67                |
| 225268_at        | KPNA4          | 2.34E-02                 | 2.10                 |
| 203372_s_at      | SOCS2          | 2.35E-02                 | -14.20               |
| 208795_s_at      | MCM7           | 2.35E-02                 | 2.49                 |
| 209687_at        | CXCL12         | 2.35E-02                 | -22.32               |
| 242546_at        | FLJ39632       | 2.35E-02                 | 13.18                |
| 205077_s_at      | PIGF           | 2.36E-02                 | 2.19                 |
| 213715_s_at      | KANK3          | 2.36E-02                 | -2.03                |
| 205250_s_at      | CEP290         | 2.37E-02                 | 2.44                 |
| 212143_s_at      | IGFBP3         | 2.37E-02                 | -13.33               |
| 242056_at        | TRIM45         | 2.37E-02                 | 3.06                 |
| 200045_at        | ABCF1          | 2.38E-02                 | 2.07                 |
| 221873_at        | ZNF143         | 2.38E-02                 | 2.05                 |
| 222401_s_at      | TMEM50A        | 2.38E-02                 | 2.30                 |
| 223480_s_at      | MRPL47         | 2.38E-02                 | 2.11                 |
| 209242_at        | PEG3           | 2.39E-02                 | -7.51                |
| 209923_s_at      | BRAP           | 2.39E-02                 | 2.06                 |
| 207262_at        | APOF           | 2.40E-02                 | -19.39               |
| 218901_at        | PLSCR4         | 2.40E-02                 | -3.61                |

| Affy<br>Probe ID | Gene<br>Symbol | Paired T-test<br>p-value | Fold Change<br>T / N |
|------------------|----------------|--------------------------|----------------------|
| 218911_at        | YEATS4         | 2.40E-02                 | 2.52                 |
| 233555_s_at      | SULF2          | 2.40E-02                 | -4.53                |
| 218977_s_at      | TRNAU1AP       | 2.41E-02                 | 2.55                 |
| 213404_s_at      | RHEB           | 2.42E-02                 | 2.21                 |
| 224962_at        | C9orf69        | 2.42E-02                 | 2.00                 |
| 238653_at        | LRIG2          | 2.42E-02                 | 2.45                 |
| 201762_s_at      | PSME2          | 2.43E-02                 | 2.44                 |
| 209827_s_at      | IL16           | 2.43E-02                 | -2.20                |
| 218395_at        | ACTR6          | 2.43E-02                 | 3.62                 |
| 220016_at        | AHNAK          | 2.43E-02                 | -2.51                |
| 222606_at        | ZWILCH         | 2.44E-02                 | 2.48                 |
| 224987_at        | C6orf89        | 2.44E-02                 | 5.10                 |
| 209901_x_at      | AIF1           | 2.45E-02                 | -2.24                |
| 220060_s_at      | C12orf48       | 2.45E-02                 | 4.57                 |
| 228561_at        | CDC37L1        | 2.45E-02                 | -5.14                |
| 202265_at        | BMI1           | 2.46E-02                 | 2.76                 |
| 202664_at        | WIPF1          | 2.46E-02                 | -2.11                |
| 203716_s_at      | DPP4           | 2.46E-02                 | 3.42                 |
| 226422_at        | ERGIC2         | 2.46E-02                 | 2.78                 |
| 228299_at        | KCTD20         | 2.46E-02                 | 2.02                 |
| 1555638_a_at     | SAMSN1         | 2.47E-02                 | -2.94                |
| 208821_at        | SNRPB          | 2.47E-02                 | 2.79                 |
| 225655_at        | UHRF1          | 2.47E-02                 | 8.58                 |
| 235763_at        | SLC44A5        | 2.47E-02                 | 147.76               |
| 223922_x_at      | MS4A6A         | 2.48E-02                 | -3.49                |
| 227297_at        | ITGA9          | 2.48E-02                 | -3.49                |
| 218560_s_at      | JMJD4          | 2.50E-02                 | 2.96                 |
| 224827_at        | UBTD2          | 2.50E-02                 | 2.52                 |
| 225865_x_at      | TH1L           | 2.50E-02                 | 2.65                 |
| 209709_s_at      | HMMR           | 2.51E-02                 | 5.85                 |
| 212934_at        | UBXN2B         | 2.51E-02                 | 2.60                 |
| 218315_s_at      | CDK5RAP1       | 2.51E-02                 | 2.23                 |
| 218883_s_at      | MLF1IP         | 2.51E-02                 | 10.91                |
| 224314_s_at      | EGLN1          | 2.51E-02                 | 2.55                 |
| 205234_at        | SLC16A4        | 2.52E-02                 | -4.01                |
| 208734_x_at      | RAB2A          | 2.52E-02                 | 2.01                 |
| 216025_x_at      | CYP2C9         | 2.52E-02                 | -8.69                |
| 220116_at        | KCNN2          | 2.52E-02                 | -44.37               |
| 209066_x_at      | UQCRB          | 2.54E-02                 | 3.72                 |
| 212149_at        | EFR3A          | 2.54E-02                 | 2.75                 |
| 210208_x_at      | BAT3           | 2.55E-02                 | 2.42                 |
| 213243_at        | VPS13B         | 2.55E-02                 | 2.30                 |
| 225599_s_at      | C8orf83        | 2.55E-02                 | 2.49                 |
| 201335_s_at      | ARHGEF12       | 2.56E-02                 | -2.60                |
| 204444_at        | KIF11          | 2.56E-02                 | 10.69                |
| 222664_at        | KCTD15         | 2.56E-02                 | -3.89                |
| 225444_at        | UBN2           | 2.56E-02                 | 2.02                 |
| 1553145_at       | FLJ39653       | 2.57E-02                 | 2.85                 |
| 205189_s_at      | FANCC          | 2.57E-02                 | -2.72                |
| 216598_s_at      | CCL2           | 2.58E-02                 | -8.35                |
| 228157_at        | ZNF207         | 2.58E-02                 | 3.92                 |
| 243009_at        | LOC441242      | 2.58E-02                 | 2.10                 |
| 206854_s_at      | MAP3K7         | 2.59E-02                 | 2.63                 |
| 212809_at        | NFATC2IP       | 2.59E-02                 | 3.24                 |
| 224494_x_at      | HSD17B14       | 2.59E-02                 | 4.76                 |
| 225766_s_at      | TNPO1          | 2.59E-02                 | 2.33                 |
| 32259_at         | EZH1           | 2.59E-02                 | 2.13                 |
| 202366_at        | ACADS          | 2.60E-02                 | -2.41                |
| 210592_s_at      | SAT1           | 2.60E-02                 | -2.67                |
| 223337_at        | SDCCAG10       | 2.61E-02                 | 2.50                 |
| 240846_at        | PCBD2          | 2.61E-02                 | 2.28                 |
| 206734_at        | JRKL           | 2.62E-02                 | 2.37                 |
| 226261_at        | ZNRF2          | 2.62E-02                 | 2.03                 |
| 234107_s_at      | DTD1           | 2.62E-02                 | 2.20                 |
| 210983_s_at      | MCM7           | 2.63E-02                 | 3.67                 |
| 204834_at        | FGL2           | 2.64E-02                 | -2.50                |
| 220496_at        | CLEC1B         | 2.64E-02                 | -60.62               |
| 239562_at        | MTHFD2L        | 2.64E-02                 | -3.98                |
| 214512_s_at      | SUB1           | 2.65E-02                 | 4.05                 |
| 219885_at        | SLFN12         | 2.65E-02                 | 2.50                 |
| 222514_at        | RRAGC          | 2.65E-02                 | 2.48                 |

| Affy<br>Probe ID | Gene<br>Symbol | Paired T-test<br>p-value | Fold Change<br>T / N |
|------------------|----------------|--------------------------|----------------------|
| 213460_x_at      | NSUN5C         | 2.67E-02                 | 2.41                 |
| 204266_s_at      | CHKA           | 2.68E-02                 | 2.09                 |
| 204514_at        | DPH2           | 2.68E-02                 | 3.84                 |
| 203640_at        | MBNL2          | 2.69E-02                 | -2.34                |
| 212445_s_at      | NEDD4L         | 2.69E-02                 | 4.99                 |
| 221230_s_at      | ARID4B         | 2.69E-02                 | 2.45                 |
| 204439_at        | IFI44L         | 2.70E-02                 | -2.52                |
| 209410_s_at      | GRB10          | 2.71E-02                 | 2.04                 |
| 212709_at        | NUP160         | 2.71E-02                 | 2.11                 |
| 221737_at        | GNA12          | 2.71E-02                 | 2.29                 |
| 1560116_a_at     | NEDD1          | 2.72E-02                 | 2.66                 |
| 214017_s_at      | DHX34          | 2.72E-02                 | 7.17                 |
| 226982_at        | ELL2           | 2.72E-02                 | -4.79                |
| 203708_at        | PDE4B          | 2.73E-02                 | -2.59                |
| 203959_s_at      | ZBTB40         | 2.73E-02                 | 3.86                 |
| 209813_x_at      | TARP           | 2.74E-02                 | -2.71                |
| 218385_at        | MRPS18A        | 2.74E-02                 | 2.76                 |
| 204092_s_at      | AURKA          | 2.75E-02                 | 6.36                 |
| 210324_at        | C8G            | 2.75E-02                 | -2.44                |
| 220750_s_at      | LEPRE1         | 2.75E-02                 | 2.45                 |
| 222683_at        | RNF20          | 2.75E-02                 | 2.23                 |
| 227803_at        | ENPP5          | 2.75E-02                 | 3.57                 |
| 210361_s_at      | ELF2           | 2.76E-02                 | -2.56                |
| 210473_s_at      | GPR125         | 2.76E-02                 | -4.09                |
| 222701_s_at      | CHCHD7         | 2.76E-02                 | 2.79                 |
| 204023_at        | RFC4           | 2.77E-02                 | 5.55                 |
| 229025_s_at      | IMMP1L         | 2.77E-02                 | 2.73                 |
| 237346_at        | TGDS           | 2.77E-02                 | -2.21                |
| 212247_at        | NUP205         | 2.78E-02                 | 2.77                 |
| 219539_at        | GEMIN6         | 2.78E-02                 | 2.71                 |
| 221434_s_at      | C14orf156      | 2.78E-02                 | 2.30                 |
| 221640_s_at      | LRDD           | 2.78E-02                 | 2.04                 |
| 227246_at        | PLRG1          | 2.78E-02                 | -2.04                |
| 231358_at        | MRO            | 2.78E-02                 | -3.23                |
| 235299_at        | SLC41A2        | 2.78E-02                 | -2.65                |
| 1554095_at       | RBM33          | 2.79E-02                 | 2.24                 |
| 207039_at        | CDKN2A         | 2.81E-02                 | 3.60                 |
| 229521_at        | FLJ36031       | 2.81E-02                 | -2.46                |
| 207874_s_at      | CFHR4          | 2.82E-02                 | -19.60               |
| 225205_at        | KIF3B          | 2.82E-02                 | 2.45                 |
| 226300_at        | MED19          | 2.82E-02                 | 2.27                 |
| 227388_at        | TUSC1          | 2.82E-02                 | -2.96                |
| 212399_s_at      | VGLL4          | 2.83E-02                 | 2.03                 |
| 217774_s_at      | TRMT112        | 2.83E-02                 | 2.54                 |
| 219487_at        | BBS10          | 2.83E-02                 | 2.32                 |
| 221570_s_at      | METTL5         | 2.83E-02                 | 2.92                 |
| 213528_at        | C1orf156       | 2.84E-02                 | 2.19                 |
| 209356_x_at      | EFEMP2         | 2.85E-02                 | -2.05                |
| 224586_x_at      | SUB1           | 2.85E-02                 | 3.42                 |
| 1554628_at       | ZNF57          | 2.86E-02                 | 2.38                 |
| 203755_at        | BUB1B          | 2.86E-02                 | 7.45                 |
| 204999_s_at      | ATF5           | 2.86E-02                 | -7.62                |
| 1569112_at       | SLC44A5        | 2.87E-02                 | 14.41                |
| 202446_s_at      | PLSCR1         | 2.87E-02                 | -2.12                |
| 205729_at        | OSMR           | 2.87E-02                 | -2.73                |
| 209469_at        | GPM6A          | 2.87E-02                 | -9.09                |
| 226267_at        | JDP2           | 2.87E-02                 | -2.30                |
| 202813_at        | TARBP1         | 2.88E-02                 | 4.10                 |
| 204449_at        | PDCL           | 2.88E-02                 | 2.56                 |
| 211339_s_at      | ITK            | 2.88E-02                 | -3.56                |
| 218829_s_at      | CHD7           | 2.88E-02                 | 2.56                 |
| 202957_at        | HCLS1          | 2.89E-02                 | -2.74                |
| 213008_at        | FANCI          | 2.89E-02                 | 13.35                |
| 213485_s_at      | ABCC10         | 2.89E-02                 | 2.43                 |
| 239001_at        | MGST1          | 2.89E-02                 | 2.74                 |
| 223452_s_at      | ATL3           | 2.90E-02                 | 2.77                 |
| 201477_s_at      | RRM1           | 2.91E-02                 | 2.79                 |
| 202872_at        | ATP6V1C1       | 2.91E-02                 | 3.03                 |
| 222666_s_at      | RCL1           | 2.91E-02                 | -8.31                |
| 223395_at        | ABI3BP         | 2.91E-02                 | -3.61                |
| 203645_s_at      | CD163          | 2.92E-02                 | -5.28                |

| Affy<br>Probe ID | Gene<br>Symbol | Paired T-test<br>p-value | Fold Change<br>T / N |
|------------------|----------------|--------------------------|----------------------|
| 206052_s_at      | SLBP           | 2.92E-02                 | 2.17                 |
| 220108_at        | GNA14          | 2.92E-02                 | -3.86                |
| 1554455_at       | LINS1          | 2.93E-02                 | 2.48                 |
| 201453_x_at      | RHEB           | 2.93E-02                 | 2.46                 |
| 201774_s_at      | NCAPD2         | 2.93E-02                 | 8.80                 |
| 227378_x_at      | C16orf13       | 2.93E-02                 | 2.03                 |
| 227978_s_at      | ZADH2          | 2.93E-02                 | -2.10                |
| 218544_s_at      | RCL1           | 2.94E-02                 | -5.21                |
| 200064_at        | HSP90AB1       | 2.95E-02                 | 3.26                 |
| 206918_s_at      | CPNE1          | 2.95E-02                 | 2.32                 |
| 208722_s_at      | ANAPC5         | 2.95E-02                 | 2.03                 |
| 219519_s_at      | SIGLEC1        | 2.95E-02                 | -9.22                |
| 205773_at        | CPEB3          | 2.96E-02                 | -3.30                |
| 213733_at        | MYO1F          | 2.96E-02                 | -2.58                |
| 219620_x_at      | C9orf167       | 2.96E-02                 | -3.38                |
| 58696_at         | EXOSC4         | 2.96E-02                 | 2.68                 |
| 210306_at        | L3MBTL         | 2.97E-02                 | 2.69                 |
| 224896_s_at      | TTL            | 2.97E-02                 | 2.64                 |
| 225006_x_at      | TH1L           | 2.97E-02                 | 3.16                 |
| 201512_s_at      | TOMM70A        | 2.98E-02                 | 2.13                 |
| 226572_at        | SOC57          | 2.98E-02                 | 2.87                 |
| 202037_s_at      | SFRP1          | 2.99E-02                 | -5.87                |
| 202647_s_at      | NRAS           | 2.99E-02                 | 4.62                 |
| 209409_at        | GRB10          | 2.99E-02                 | 2.43                 |
| 212897_at        | CDC2L6         | 2.99E-02                 | 2.51                 |
| 217880_at        | CDC27          | 2.99E-02                 | 2.37                 |
| 235496_at        | HRCT1          | 2.99E-02                 | 8.56                 |
| 203830_at        | C17orf75       | 3.00E-02                 | 4.68                 |
| 208973_at        | ERI3           | 3.00E-02                 | 2.32                 |
| 212983_at        | HRAS           | 3.00E-02                 | 3.66                 |
| 57163_at         | ELOVL1         | 3.00E-02                 | 2.56                 |
| 217408_at        | MRPS18B        | 3.01E-02                 | 2.93                 |
| 230270_at        | PRPF38B        | 3.01E-02                 | 2.51                 |
| 203840_at        | BLZF1          | 3.02E-02                 | 2.43                 |
| 226436_at        | RASSF4         | 3.02E-02                 | 3.82                 |
| 201714_at        | TUBG1          | 3.03E-02                 | 4.01                 |
| 203511_s_at      | TRAPPC3        | 3.03E-02                 | 2.12                 |
| 223702_x_at      | FTCD           | 3.03E-02                 | -3.34                |
| 203104_at        | CSF1R          | 3.04E-02                 | -2.62                |
| 209380_s_at      | ABCC5          | 3.04E-02                 | 2.63                 |
| 223330_s_at      | SUGT1          | 3.04E-02                 | 2.10                 |
| 226225_at        | MCC            | 3.04E-02                 | -7.91                |
| 212148_at        | PBX1           | 3.06E-02                 | -3.72                |
| 238756_at        | GAS2L3         | 3.06E-02                 | 3.60                 |
| 244569_at        | C8orf37        | 3.06E-02                 | 2.19                 |
| 224300_x_at      | FTCD           | 3.07E-02                 | -3.62                |
| 228047_at        | SNORA72        | 3.07E-02                 | 3.03                 |
| 201170_s_at      | BHLHE40        | 3.08E-02                 | -4.88                |
| 215049_x_at      | CD163          | 3.08E-02                 | -5.03                |
| 218838_s_at      | TTC31          | 3.08E-02                 | 2.36                 |
| 220018_at        | CBLL1          | 3.08E-02                 | 2.36                 |
| 225510_at        | OAF            | 3.08E-02                 | -2.50                |
| 217739_s_at      | NAMPT          | 3.09E-02                 | -5.24                |
| 219512_at        | DSN1           | 3.09E-02                 | 2.85                 |
| 218622_at        | NUP37          | 3.10E-02                 | 3.16                 |
| 223758_s_at      | GTF2H2         | 3.10E-02                 | 3.59                 |
| 205449_at        | SAC3D1         | 3.11E-02                 | 9.08                 |
| 206205_at        | MPHOSPH9       | 3.11E-02                 | 2.29                 |
| 227697_at        | SOCS3          | 3.11E-02                 | -10.36               |
| 1555167_s_at     | NAMPT          | 3.12E-02                 | -7.35                |
| 203362_s_at      | MAD2L1         | 3.12E-02                 | 6.00                 |
| 210609_s_at      | TP53I3         | 3.12E-02                 | 7.67                 |
| 212355_at        | KIAA0323       | 3.12E-02                 | 2.76                 |
| 225082_at        | CPSF3          | 3.12E-02                 | 2.44                 |
| 208002_s_at      | ACOT7          | 3.13E-02                 | 2.51                 |
| 209026_x_at      | TUBB           | 3.13E-02                 | 2.23                 |
| 201300_s_at      | PRNP           | 3.14E-02                 | -4.31                |
| 204818_at        | HSD17B2        | 3.14E-02                 | -4.04                |
| 209699_x_at      | AKR1C2         | 3.14E-02                 | 2.69                 |
| 209335_at        | DCN            | 3.15E-02                 | -8.23                |
| 225031_at        | CHD6           | 3.15E-02                 | 2.34                 |

| Affy<br>Probe ID | Gene<br>Symbol | Paired T-test<br>p-value | Fold Change<br>T / N |
|------------------|----------------|--------------------------|----------------------|
| 228662_at        | SOCS7          | 3.15E-02                 | 2.88                 |
| 201144_s_at      | EIF2S1         | 3.16E-02                 | 2.28                 |
| 203131_at        | PDGFRA         | 3.16E-02                 | -10.48               |
| 207628_s_at      | WBSCR22        | 3.16E-02                 | 2.16                 |
| 210543_s_at      | PRKDC          | 3.16E-02                 | 4.01                 |
| 213056_at        | FRMD4B         | 3.16E-02                 | -3.37                |
| 218585_s_at      | DTL            | 3.16E-02                 | 18.01                |
| 219581_at        | TSEN2          | 3.16E-02                 | 2.44                 |
| 208016_s_at      | AGTR1          | 3.17E-02                 | -4.68                |
| 210859_x_at      | CLN3           | 3.17E-02                 | 2.52                 |
| 213009_s_at      | TRIM37         | 3.17E-02                 | 2.76                 |
| 200909_s_at      | RPLP2          | 3.18E-02                 | 2.13                 |
| 201809_s_at      | ENG            | 3.18E-02                 | -3.21                |
| 214719_at        | SLC46A3        | 3.18E-02                 | -8.64                |
| 216038_x_at      | DAXX           | 3.18E-02                 | 2.24                 |
| 228330_at        | ZUFSP          | 3.18E-02                 | 2.05                 |
| 213773_x_at      | NSUN5          | 3.19E-02                 | 2.26                 |
| 221498_at        | SNX27          | 3.19E-02                 | 3.22                 |
| 218046_s_at      | MRPS16         | 3.20E-02                 | 2.42                 |
| 225203_at        | PPP1R16A       | 3.20E-02                 | 4.00                 |
| 204731_at        | TGFBR3         | 3.21E-02                 | -2.91                |
| 211557_x_at      | SLCO2B1        | 3.21E-02                 | -2.10                |
| 214140_at        | SLC25A16       | 3.21E-02                 | 2.18                 |
| 239085_at        | JDP2           | 3.21E-02                 | -2.34                |
| 203502_at        | BPGM           | 3.22E-02                 | 2.79                 |
| 209034_at        | PNRC1          | 3.22E-02                 | -2.86                |
| 219700_at        | PLXDC1         | 3.22E-02                 | 2.56                 |
| 225912_at        | TP53INP1       | 3.22E-02                 | 2.13                 |
| 228189_at        | BAG4           | 3.22E-02                 | 2.09                 |
| 1553984_s_at     | DTYMK          | 3.24E-02                 | 3.41                 |
| 205909_at        | POLE2          | 3.24E-02                 | 4.27                 |
| 226483_at        | TMEM68         | 3.24E-02                 | 2.87                 |
| 203501_at        | PGCP           | 3.25E-02                 | 2.18                 |
| 216071_x_at      | MED12          | 3.25E-02                 | 2.26                 |
| 203225_s_at      | RFK            | 3.26E-02                 | 2.38                 |
| 218106_s_at      | MRPS10         | 3.26E-02                 | 3.18                 |
| 221802_s_at      | KIAA1598       | 3.26E-02                 | 3.06                 |
| 230964_at        | FREM2          | 3.26E-02                 | -21.96               |
| 212922_s_at      | SMYD2          | 3.27E-02                 | 3.03                 |
| 215462_at        | PLK3           | 3.27E-02                 | -3.94                |
| 218859_s_at      | ESF1           | 3.27E-02                 | 4.97                 |
| 52731_at         | AMBRA1         | 3.27E-02                 | 2.40                 |
| 201672_s_at      | USP14          | 3.28E-02                 | 2.25                 |
| 212486_s_at      | FYN            | 3.28E-02                 | -3.60                |
| 226801_s_at      | AIDA           | 3.28E-02                 | 2.30                 |
| 201041_s_at      | DUSP1          | 3.29E-02                 | -5.28                |
| 220786_s_at      | SLC38A4        | 3.29E-02                 | -3.35                |
| 228384_s_at      | PYROXD2        | 3.29E-02                 | -5.49                |
| 209786_at        | HMGN4          | 3.30E-02                 | 2.40                 |
| 216295_s_at      | CLTA           | 3.30E-02                 | 2.56                 |
| 219878_s_at      | KLF13          | 3.30E-02                 | 3.99                 |
| 225642_at        | KTI12          | 3.30E-02                 | 2.34                 |
| 227898_s_at      | ZFP41          | 3.30E-02                 | 16.25                |
| 204150_at        | STAB1          | 3.31E-02                 | -3.34                |
| 223258_s_at      | G2E3           | 3.31E-02                 | 3.81                 |
| 225196_s_at      | MRPS26         | 3.31E-02                 | 2.04                 |
| 218252_at        | CKAP2          | 3.32E-02                 | 3.43                 |
| 223270_at        | CTDSPL2        | 3.32E-02                 | 3.17                 |
| 212918_at        | RECQL          | 3.33E-02                 | 2.10                 |
| 209505_at        | NR2F1          | 3.34E-02                 | -3.67                |
| 237350_at        | TTC36          | 3.34E-02                 | -11.47               |
| 218234_at        | ING4           | 3.35E-02                 | 2.33                 |
| 201566_x_at      | ID2            | 3.36E-02                 | -8.85                |
| 205821_at        | KLRK1          | 3.36E-02                 | -3.21                |
| 200610_s_at      | NCL            | 3.37E-02                 | 2.03                 |
| 209657_s_at      | HSF2           | 3.37E-02                 | 3.58                 |
| 221474_at        | MYL12B         | 3.37E-02                 | 2.23                 |
| 226707_at        | NAPRT1         | 3.37E-02                 | 2.19                 |
| 201498_at        | USP7           | 3.38E-02                 | 2.59                 |
| 206662_at        | GLRX           | 3.38E-02                 | -4.04                |
| 223055_s_at      | XPO5           | 3.38E-02                 | 2.87                 |

| Affy<br>Probe ID | Gene<br>Symbol | Paired T-test<br>p-value | Fold Change<br>T / N |
|------------------|----------------|--------------------------|----------------------|
| 201694_s_at      | EGR1           | 3.40E-02                 | -6.48                |
| 207543_s_at      | P4HA1          | 3.40E-02                 | -2.85                |
| 38290_at         | RGS14          | 3.40E-02                 | 2.15                 |
| 226936_at        | C6orf173       | 3.41E-02                 | 6.76                 |
| 1555501_s_at     | RSRC1          | 3.42E-02                 | 2.97                 |
| 205687_at        | UBFD1          | 3.42E-02                 | 2.23                 |
| 221637_s_at      | C11orf48       | 3.42E-02                 | 2.46                 |
| 223448_x_at      | MRPS22         | 3.42E-02                 | 2.40                 |
| 227558_at        | CBX4           | 3.42E-02                 | 3.93                 |
| 231671_at        | FGA            | 3.42E-02                 | -3.06                |
| 44146_at         | GMEB2          | 3.42E-02                 | 2.33                 |
| 203953_s_at      | CLDN3          | 3.43E-02                 | 2.71                 |
| 231926_at        | EPS15L1        | 3.43E-02                 | 2.64                 |
| 203887_s_at      | THBD           | 3.44E-02                 | -2.75                |
| 229980_s_at      | SNX5           | 3.44E-02                 | 2.16                 |
| 200960_x_at      | CLTA           | 3.45E-02                 | 3.36                 |
| 232873_at        | ZNF33A         | 3.45E-02                 | 3.33                 |
| 201720_s_at      | LAPTM5         | 3.46E-02                 | -2.08                |
| 207541_s_at      | EXOSC10        | 3.46E-02                 | 2.06                 |
| 212097_at        | CAV1           | 3.46E-02                 | 2.29                 |
| 1558700_s_at     | ZNF260         | 3.48E-02                 | 2.01                 |
| 201377_at        | UBAP2L         | 3.48E-02                 | 4.02                 |
| 204334_at        | KLF7           | 3.49E-02                 | -2.83                |
| 223110_at        | KIAA1429       | 3.49E-02                 | 2.18                 |
| 228124_at        | ABHD12         | 3.49E-02                 | 2.25                 |
| 228469_at        | PPID           | 3.49E-02                 | -4.78                |
| 201797_s_at      | VAR5           | 3.50E-02                 | 2.65                 |
| 221842_s_at      | ZNF131         | 3.50E-02                 | 2.81                 |
| 230435_at        | LOC375190      | 3.50E-02                 | 3.02                 |
| 232216_at        | YME1L1         | 3.50E-02                 | 2.02                 |
| 221887_s_at      | DFNB31         | 3.51E-02                 | 3.30                 |
| 204955_at        | SRPX           | 3.52E-02                 | -10.43               |
| 204970_s_at      | MAFG           | 3.52E-02                 | 2.99                 |
| 205307_s_at      | KMO            | 3.52E-02                 | -27.46               |
| 219258_at        | TIPIN          | 3.52E-02                 | 3.76                 |
| 238295_at        | C17orf42       | 3.53E-02                 | 2.93                 |
| 206541_at        | KLKB1          | 3.54E-02                 | -6.29                |
| 217286_s_at      | NDRG3          | 3.54E-02                 | 2.25                 |
| 202227_s_at      | BRD8           | 3.55E-02                 | 2.76                 |
| 202230_s_at      | CHERP          | 3.55E-02                 | 2.18                 |
| 222493_s_at      | ZFAND3         | 3.55E-02                 | 2.35                 |
| 200608_s_at      | RAD21          | 3.56E-02                 | 2.65                 |
| 201892_s_at      | IMPDH2         | 3.56E-02                 | 2.32                 |
| 204862_s_at      | NME3           | 3.56E-02                 | 2.27                 |
| 225694_at        | CRKRS          | 3.56E-02                 | 2.02                 |
| 226750_at        | LARP1B         | 3.56E-02                 | -2.96                |
| 242956_at        | IDH1           | 3.56E-02                 | 3.69                 |
| 217934_x_at      | STUB1          | 3.57E-02                 | 2.36                 |
| 225301_s_at      | MYO5B          | 3.57E-02                 | 3.76                 |
| 204767_s_at      | FEN1           | 3.58E-02                 | 4.17                 |
| 205543_at        | HSPA4L         | 3.58E-02                 | -3.26                |
| 211009_s_at      | ZNF271         | 3.58E-02                 | 2.16                 |
| 225765_at        | TNPO1          | 3.58E-02                 | 2.83                 |
| 229172_at        | HSPA12B        | 3.58E-02                 | 3.34                 |
| 231857_s_at      | AGBL5          | 3.58E-02                 | 2.51                 |
| 217947_at        | CMTM6          | 3.59E-02                 | -2.09                |
| 205437_at        | ZNF211         | 3.60E-02                 | 2.12                 |
| 209305_s_at      | GADD45B        | 3.60E-02                 | -19.70               |
| 224598_at        | MGAT4B         | 3.60E-02                 | 3.06                 |
| 1554424_at       | FIP1L1         | 3.61E-02                 | -2.26                |
| 210386_s_at      | MTX1           | 3.61E-02                 | 2.05                 |
| 211548_s_at      | HPGD           | 3.61E-02                 | -7.87                |
| 218870_at        | ARHGAP15       | 3.61E-02                 | -2.78                |
| 228821_at        | ST6GAL2        | 3.61E-02                 | -9.24                |
| 1558304_s_at     | TSEN54         | 3.62E-02                 | 2.84                 |
| 201169_s_at      | BHLHE40        | 3.62E-02                 | -5.45                |
| 223411_at        | MIF4GD         | 3.62E-02                 | 2.42                 |
| 202893_at        | UNC13B         | 3.63E-02                 | 3.06                 |
| 221515_s_at      | LCMT1          | 3.63E-02                 | 2.14                 |
| 201618_x_at      | GPAA1          | 3.64E-02                 | 3.12                 |
| 207096_at        | SAA4           | 3.64E-02                 | -11.69               |



| Affy<br>Probe ID | Gene<br>Symbol | Paired T-test<br>p-value | Fold Change<br>T / N |
|------------------|----------------|--------------------------|----------------------|
| 202503_s_at      | KIAA0101       | 3.65E-02                 | 10.92                |
| 208678_at        | ATP6V1E1       | 3.65E-02                 | 2.13                 |
| 218617_at        | TRIT1          | 3.65E-02                 | 2.08                 |
| 230912_at        | ASPDH          | 3.65E-02                 | -2.68                |
| 209063_x_at      | PAIP1          | 3.66E-02                 | 2.00                 |
| 215947_s_at      | FAM136A        | 3.66E-02                 | 2.60                 |
| 226426_at        | ADNP           | 3.66E-02                 | 2.31                 |
| 34210_at         | CD52           | 3.66E-02                 | -2.61                |
| 203073_at        | COG2           | 3.67E-02                 | 2.33                 |
| 204988_at        | FGB            | 3.67E-02                 | -2.80                |
| 207401_at        | PROX1          | 3.67E-02                 | -2.67                |
| 230788_at        | GCNT2          | 3.67E-02                 | -3.03                |
| 202200_s_at      | SRPK1          | 3.68E-02                 | 2.08                 |
| 202679_at        | NPC1           | 3.68E-02                 | 2.36                 |
| 202737_s_at      | LSM4           | 3.68E-02                 | 3.24                 |
| 213131_at        | OLFM1          | 3.68E-02                 | -2.65                |
| 204595_s_at      | STC1           | 3.69E-02                 | 3.57                 |
| 206009_at        | ITGA9          | 3.69E-02                 | -2.16                |
| 206932_at        | CH25H          | 3.69E-02                 | -3.11                |
| 201503_at        | G3BP1          | 3.70E-02                 | 2.16                 |
| 219293_s_at      | OLA1           | 3.70E-02                 | 2.04                 |
| 211040_x_at      | GTSE1          | 3.71E-02                 | 2.22                 |
| 219644_at        | CCDC41         | 3.71E-02                 | 2.18                 |
| 239742_at        | TULP4          | 3.71E-02                 | 3.75                 |
| 202040_s_at      | KDM5A          | 3.72E-02                 | 2.24                 |
| 209656_s_at      | TMEM47         | 3.72E-02                 | -3.02                |
| 209902_at        | ATR            | 3.72E-02                 | 2.33                 |
| 203410_at        | AP3M2          | 3.73E-02                 | 2.05                 |
| 213927_at        | MAP3K9         | 3.73E-02                 | 3.95                 |
| 226329_s_at      | MITD1          | 3.73E-02                 | 2.40                 |
| 228186_s_at      | RSPO3          | 3.73E-02                 | -10.40               |
| 236027_at        | C10orf78       | 3.73E-02                 | 3.06                 |
| 212448_at        | NEDD4L         | 3.75E-02                 | 4.27                 |
| 217741_s_at      | ZFAND5         | 3.75E-02                 | -2.84                |
| 235033_at        | NPEPL1         | 3.75E-02                 | 2.20                 |
| 217738_at        | NAMPT          | 3.76E-02                 | -4.57                |
| 1554080_at       | RQCD1          | 3.77E-02                 | 3.96                 |
| 224468_s_at      | C19orf48       | 3.77E-02                 | 2.87                 |
| 227103_s_at      | ECE2           | 3.77E-02                 | 2.72                 |
| 243_g_at         | MAP4           | 3.77E-02                 | 2.08                 |
| 207330_at        | PZP            | 3.78E-02                 | -12.98               |
| 212638_s_at      | WWP1           | 3.78E-02                 | 2.05                 |
| 203612_at        | BYSL           | 3.79E-02                 | 3.23                 |
| 205024_s_at      | RAD51          | 3.79E-02                 | 2.87                 |
| 214061_at        | WDR67          | 3.79E-02                 | 3.34                 |
| 204771_s_at      | TTF1           | 3.80E-02                 | 2.96                 |
| 227541_at        | WDR20          | 3.80E-02                 | 2.16                 |
| 217559_at        | RPL10L         | 3.81E-02                 | 4.55                 |
| 218637_at        | IMPACT         | 3.81E-02                 | 2.28                 |
| 225538_at        | ZCCHC9         | 3.81E-02                 | 3.37                 |
| 231579_s_at      | TIMP2          | 3.81E-02                 | -2.28                |
| 204050_s_at      | CLTA           | 3.82E-02                 | 3.08                 |
| 213626_at        | CBR4           | 3.82E-02                 | -2.86                |
| 215235_at        | SPTAN1         | 3.82E-02                 | 2.16                 |
| 221705_s_at      | SIKE1          | 3.82E-02                 | 2.10                 |
| 225520_at        | MTHFD1L        | 3.82E-02                 | 2.89                 |
| 232195_at        | GPR158         | 3.82E-02                 | 45.52                |
| 216088_s_at      | PSMA7          | 3.83E-02                 | 2.23                 |
| 221829_s_at      | TNPO1          | 3.83E-02                 | 2.96                 |
| 224299_x_at      | FTCD           | 3.83E-02                 | -3.54                |
| 209540_at        | IGF1           | 3.84E-02                 | -15.35               |
| 209899_s_at      | PUF60          | 3.84E-02                 | 2.61                 |
| 212349_at        | POFUT1         | 3.84E-02                 | 2.03                 |
| 222637_at        | COMMD10        | 3.84E-02                 | 2.22                 |
| 1557226_a_at     | ASPG           | 3.85E-02                 | -2.78                |
| 201795_at        | LBR            | 3.85E-02                 | 2.83                 |
| 204055_s_at      | CTAGE5         | 3.85E-02                 | 2.80                 |
| 207571_x_at      | C1orf38        | 3.85E-02                 | -2.39                |
| 213226_at        | CCNA2          | 3.85E-02                 | 18.52                |
| 230100_x_at      | PAK1           | 3.85E-02                 | 2.02                 |
| 205554_s_at      | DNASE1L3       | 3.86E-02                 | -15.38               |

| Affy<br>Probe ID | Gene<br>Symbol | Paired T-test<br>p-value | Fold Change<br>T / N |
|------------------|----------------|--------------------------|----------------------|
| 213104_at        | C16orf42       | 3.87E-02                 | 2.22                 |
| 218287_s_at      | EIF2C1         | 3.87E-02                 | 2.03                 |
| 230165_at        | SGOL2          | 3.87E-02                 | 5.37                 |
| 201473_at        | JUNB           | 3.88E-02                 | -4.14                |
| 211713_x_at      | KIAA0101       | 3.88E-02                 | 2.11                 |
| 226165_at        | C8orf59        | 3.88E-02                 | 3.66                 |
| 230288_at        | FGF14          | 3.88E-02                 | 14.26                |
| 53720_at         | C19orf66       | 3.88E-02                 | -2.52                |
| 205674_x_at      | FXYP2          | 3.89E-02                 | -3.32                |
| 209523_at        | TAF2           | 3.89E-02                 | 3.06                 |
| 209541_at        | IGF1           | 3.89E-02                 | -20.00               |
| 222380_s_at      | PDCD6          | 3.89E-02                 | 2.05                 |
| 203721_s_at      | UTP18          | 3.90E-02                 | 2.41                 |
| 202846_s_at      | PIGC           | 3.91E-02                 | 2.52                 |
| 207098_s_at      | MFN1           | 3.91E-02                 | 2.07                 |
| 223879_s_at      | OXR1           | 3.91E-02                 | 3.77                 |
| 231188_at        | ZSCAN2         | 3.91E-02                 | 2.87                 |
| 201652_at        | COPS5          | 3.92E-02                 | 2.24                 |
| 214617_at        | PRF1           | 3.92E-02                 | -2.28                |
| 214948_s_at      | TMF1           | 3.92E-02                 | 2.71                 |
| 1556126_s_at     | GPATCH2        | 3.93E-02                 | 2.00                 |
| 201044_x_at      | DUSP1          | 3.93E-02                 | -12.44               |
| 203358_s_at      | EZH2           | 3.93E-02                 | 14.43                |
| 215017_s_at      | FNBP1L         | 3.93E-02                 | 2.38                 |
| 218353_at        | RGS5           | 3.93E-02                 | 3.41                 |
| 218695_at        | EXOSC4         | 3.93E-02                 | 3.23                 |
| 226992_at        | NOSTRIN        | 3.93E-02                 | -2.11                |
| 227719_at        | SMAD9          | 3.95E-02                 | -3.27                |
| 1563445_x_at     | CTSLL3         | 3.96E-02                 | -2.64                |
| 205187_at        | SMAD5          | 3.96E-02                 | 2.07                 |
| 215230_x_at      | EIF3C          | 3.96E-02                 | 2.84                 |
| 218448_at        | C20orf11       | 3.98E-02                 | 2.95                 |
| 218907_s_at      | LRRRC61        | 3.98E-02                 | 4.03                 |
| 223556_at        | HELLS          | 3.98E-02                 | 8.43                 |
| 202087_s_at      | CTSL1          | 3.99E-02                 | -2.12                |
| 209853_s_at      | PSME3          | 3.99E-02                 | 2.29                 |
| 211302_s_at      | PDE4B          | 3.99E-02                 | -2.21                |
| 218087_s_at      | SORBS1         | 3.99E-02                 | -2.67                |
| 220155_s_at      | BRD9           | 3.99E-02                 | 2.72                 |
| 51228_at         | RBM12B         | 3.99E-02                 | 2.84                 |
| 225968_at        | PRICKLE2       | 4.00E-02                 | -2.27                |
| 201704_at        | ENTPD6         | 4.01E-02                 | 2.59                 |
| 211470_s_at      | SULT1C2        | 4.01E-02                 | 41.42                |
| 220017_x_at      | CYP2C9         | 4.01E-02                 | -7.64                |
| 203879_at        | PIK3CD         | 4.02E-02                 | -3.79                |
| 219456_s_at      | RIN3           | 4.02E-02                 | -2.10                |
| 1555758_a_at     | CDKN3          | 4.03E-02                 | 18.21                |
| 201675_at        | AKAP1          | 4.03E-02                 | 2.22                 |
| 204829_s_at      | FOLR2          | 4.04E-02                 | -2.62                |
| 207231_at        | DZIP3          | 4.04E-02                 | 2.39                 |
| 219131_at        | UBIAD1         | 4.04E-02                 | 3.44                 |
| 232164_s_at      | EPPK1          | 4.04E-02                 | 7.15                 |
| 1556060_a_at     | ZNF451         | 4.05E-02                 | 2.45                 |
| 202242_at        | TSPAN7         | 4.05E-02                 | -3.15                |
| 225020_at        | DAB2IP         | 4.05E-02                 | 2.57                 |
| 235132_at        | LOC254128      | 4.06E-02                 | 2.14                 |
| 202883_s_at      | PPP2R1B        | 4.07E-02                 | -2.02                |
| 205167_s_at      | CDC25C         | 4.07E-02                 | 21.35                |
| 209606_at        | CYTIP          | 4.07E-02                 | -2.49                |
| 228160_at        | LOC339290      | 4.08E-02                 | 2.07                 |
| 203536_s_at      | CIAO1          | 4.09E-02                 | 2.11                 |
| 203562_at        | FEZ1           | 4.09E-02                 | -4.27                |
| 204579_at        | FGFR4          | 4.09E-02                 | 2.38                 |
| 227029_at        | FAM177A1       | 4.09E-02                 | 2.45                 |
| 201565_s_at      | ID2            | 4.10E-02                 | -5.66                |
| 202288_at        | MTOR           | 4.10E-02                 | 2.19                 |
| 203035_s_at      | PIAS3          | 4.10E-02                 | 3.52                 |
| 215160_x_at      | LOC642236      | 4.10E-02                 | 2.21                 |
| 396_f_at         | EPOR           | 4.10E-02                 | -2.18                |
| 218205_s_at      | MKNK2          | 4.11E-02                 | 2.10                 |
| 223605_at        | SLC25A18       | 4.11E-02                 | -10.95               |

| Affy<br>Probe ID | Gene<br>Symbol | Paired T-test<br>p-value | Fold Change<br>T / N |
|------------------|----------------|--------------------------|----------------------|
| 225701_at        | AKNA           | 4.11E-02                 | -2.29                |
| 238441_at        | PRKAA2         | 4.12E-02                 | 9.52                 |
| 1553510_s_at     | RQCD1          | 4.13E-02                 | 2.56                 |
| 200827_at        | PLOD1          | 4.13E-02                 | 2.15                 |
| 201485_s_at      | RCN2           | 4.13E-02                 | 2.66                 |
| 208975_s_at      | KPNB1          | 4.13E-02                 | 2.78                 |
| 218009_s_at      | PRC1           | 4.13E-02                 | 42.66                |
| 232165_at        | EPPK1          | 4.13E-02                 | 11.18                |
| 208694_at        | PRKDC          | 4.14E-02                 | 3.50                 |
| 219230_at        | TMEM100        | 4.14E-02                 | -6.95                |
| 221725_at        | WASF2          | 4.14E-02                 | 2.20                 |
| 202111_at        | SLC4A2         | 4.15E-02                 | 2.61                 |
| 218979_at        | RMI1           | 4.15E-02                 | 2.93                 |
| 210143_at        | ANXA10         | 4.16E-02                 | -19.07               |
| 210629_x_at      | LST1           | 4.16E-02                 | -2.62                |
| 211582_x_at      | LST1           | 4.16E-02                 | -3.67                |
| 218512_at        | WDR12          | 4.16E-02                 | 2.33                 |
| 222388_s_at      | VPS35          | 4.16E-02                 | 2.29                 |
| 225316_at        | MFSD2          | 4.16E-02                 | -13.63               |
| 224782_at        | ZMAT2          | 4.17E-02                 | 2.42                 |
| 225638_at        | C1orf31        | 4.17E-02                 | 2.30                 |
| 230873_at        | TTLL3          | 4.17E-02                 | 2.18                 |
| 206030_at        | ASPA           | 4.18E-02                 | -9.00                |
| 217362_x_at      | HLA-DRB6       | 4.18E-02                 | -3.15                |
| 227863_at        | CTSD           | 4.18E-02                 | -3.71                |
| 203954_x_at      | CLDN3          | 4.19E-02                 | 2.86                 |
| 208784_s_at      | KLHDC3         | 4.19E-02                 | 3.27                 |
| 226632_at        | CYGB           | 4.19E-02                 | -2.31                |
| 229963_at        | BEX5           | 4.19E-02                 | -2.72                |
| 202144_s_at      | ADSL           | 4.20E-02                 | 2.63                 |
| 206219_s_at      | VAV1           | 4.20E-02                 | -2.43                |
| 226629_at        | SLC43A2        | 4.20E-02                 | 2.69                 |
| 208991_at        | STAT3          | 4.21E-02                 | -2.21                |
| 216661_x_at      | MUTYH          | 4.21E-02                 | -11.03               |
| 223515_s_at      | COQ3           | 4.21E-02                 | 2.48                 |
| 201730_s_at      | TPR            | 4.22E-02                 | 2.80                 |
| 220114_s_at      | STAB2          | 4.22E-02                 | -28.19               |
| 200021_at        | CFL1           | 4.23E-02                 | 2.72                 |
| 204700_x_at      | C1orf107       | 4.23E-02                 | 2.28                 |
| 224986_s_at      | PDPK1          | 4.23E-02                 | 2.12                 |
| 226278_at        | SVIP           | 4.23E-02                 | 2.83                 |
| 203956_at        | MORC2          | 4.24E-02                 | 2.05                 |
| 207434_s_at      | FXD2           | 4.24E-02                 | -3.53                |
| 214735_at        | IPCEF1         | 4.24E-02                 | -2.05                |
| 224738_x_at      | RPL7L1         | 4.24E-02                 | 2.04                 |
| 200783_s_at      | STMN1          | 4.25E-02                 | 2.72                 |
| 229312_s_at      | GKAP1          | 4.25E-02                 | 2.39                 |
| 223467_at        | RASD1          | 4.27E-02                 | -6.84                |
| 204459_at        | CSTF2          | 4.28E-02                 | 4.64                 |
| 200837_at        | BCAP31         | 4.29E-02                 | 2.70                 |
| 203302_at        | DCK            | 4.29E-02                 | 2.29                 |
| 204108_at        | NFYA           | 4.29E-02                 | 2.41                 |
| 213911_s_at      | H2AFZ          | 4.29E-02                 | 3.26                 |
| 218643_s_at      | CRIPT          | 4.29E-02                 | 3.09                 |
| 225170_at        | WDR5           | 4.29E-02                 | 2.11                 |
| 201656_at        | ITGA6          | 4.30E-02                 | 5.40                 |
| 226818_at        | MPEG1          | 4.30E-02                 | -2.79                |
| 201841_s_at      | HSPB1          | 4.31E-02                 | 4.95                 |
| 204240_s_at      | SMC2           | 4.31E-02                 | 3.51                 |
| 218895_at        | GPATCH3        | 4.31E-02                 | 2.58                 |
| 242577_at        | LOC389834      | 4.31E-02                 | 7.47                 |
| 201540_at        | FHL1           | 4.32E-02                 | -4.25                |
| 203160_s_at      | RNF8           | 4.32E-02                 | 3.23                 |
| 211501_s_at      | EIF3B          | 4.32E-02                 | 2.52                 |
| 219612_s_at      | FGG            | 4.32E-02                 | -2.22                |
| 204924_at        | TLR2           | 4.33E-02                 | -3.62                |
| 206218_at        | MAGEB2         | 4.33E-02                 | 11.97                |
| 212187_x_at      | PTGDS          | 4.33E-02                 | -7.62                |
| 215425_at        | BTG3           | 4.33E-02                 | 3.00                 |
| 227404_s_at      | EGR1           | 4.34E-02                 | -9.43                |
| 242923_at        | ZNF678         | 4.34E-02                 | 4.26                 |

| Affy<br>Probe ID | Gene<br>Symbol | Paired T-test<br>p-value | Fold Change<br>T / N |
|------------------|----------------|--------------------------|----------------------|
| 201663_s_at      | SMC4           | 4.35E-02                 | 3.06                 |
| 201817_at        | UBE3C          | 4.36E-02                 | 2.46                 |
| 202075_s_at      | PLTP           | 4.36E-02                 | -3.59                |
| 203914_x_at      | HPGD           | 4.36E-02                 | -7.06                |
| 208131_s_at      | PTGIS          | 4.36E-02                 | -8.66                |
| 212554_at        | CAP2           | 4.36E-02                 | 14.33                |
| 217994_x_at      | CPSF3L         | 4.36E-02                 | 2.01                 |
| 227070_at        | GLT8D2         | 4.36E-02                 | -4.02                |
| 57516_at         | ZNF764         | 4.36E-02                 | 4.23                 |
| 202330_s_at      | UNG            | 4.37E-02                 | 2.16                 |
| 210999_s_at      | GRB10          | 4.37E-02                 | 2.82                 |
| 204489_s_at      | CD44           | 4.38E-02                 | -2.08                |
| 225319_s_at      | FAM104A        | 4.39E-02                 | 2.79                 |
| 204825_at        | MELK           | 4.40E-02                 | 53.26                |
| 213452_at        | ZNF184         | 4.40E-02                 | 2.58                 |
| 213566_at        | RNASE6         | 4.40E-02                 | -2.11                |
| 222589_at        | NLK            | 4.40E-02                 | 2.02                 |
| 203318_s_at      | ZNF148         | 4.41E-02                 | 2.12                 |
| 219228_at        | ZNF331         | 4.41E-02                 | -2.68                |
| 219000_s_at      | DSCC1          | 4.42E-02                 | 6.69                 |
| 224632_at        | GPATCH4        | 4.42E-02                 | 2.69                 |
| 37424_at         | CCHCR1         | 4.43E-02                 | 4.44                 |
| 200882_s_at      | PSMD4          | 4.44E-02                 | 3.72                 |
| 218698_at        | APIP           | 4.44E-02                 | 2.38                 |
| 233587_s_at      | SIPA1L2        | 4.44E-02                 | 3.30                 |
| 200618_at        | LASP1          | 4.45E-02                 | 2.89                 |
| 201777_s_at      | KIAA0494       | 4.45E-02                 | 2.25                 |
| 1555250_a_at     | CPEB3          | 4.46E-02                 | -4.92                |
| 209291_at        | ID4            | 4.46E-02                 | -2.84                |
| 205019_s_at      | VIPR1          | 4.47E-02                 | -10.96               |
| 212807_s_at      | SORT1          | 4.47E-02                 | 5.11                 |
| 218263_s_at      | ZBED5          | 4.47E-02                 | 2.04                 |
| 220371_s_at      | SLC12A9        | 4.47E-02                 | 2.05                 |
| 1569189_at       | TTC9C          | 4.48E-02                 | 2.15                 |
| 203231_s_at      | ATXN1          | 4.48E-02                 | 2.32                 |
| 220137_at        | FLJ20674       | 4.48E-02                 | 2.27                 |
| 220994_s_at      | STXBP6         | 4.48E-02                 | 22.33                |
| 213320_at        | PRMT3          | 4.49E-02                 | 2.40                 |
| 225439_at        | NUDCD1         | 4.49E-02                 | 2.60                 |
| 227804_at        | TLCD1          | 4.49E-02                 | 4.73                 |
| 202444_s_at      | ERLIN1         | 4.50E-02                 | -5.14                |
| 205436_s_at      | H2AFX          | 4.50E-02                 | 2.84                 |
| 226789_at        | EMB            | 4.50E-02                 | -3.36                |
| 215563_s_at      | MSTP9          | 4.51E-02                 | -2.25                |
| 218854_at        | DSE            | 4.51E-02                 | -2.41                |
| 223037_at        | PDZD11         | 4.51E-02                 | 2.59                 |
| 227179_at        | STAU2          | 4.51E-02                 | 3.36                 |
| 227718_at        | PURB           | 4.51E-02                 | 2.84                 |
| 204510_at        | CDC7           | 4.52E-02                 | 2.81                 |
| 205116_at        | LAMA2          | 4.52E-02                 | -2.15                |
| 218479_s_at      | XPO4           | 4.52E-02                 | 2.76                 |
| 207727_s_at      | MUTYH          | 4.53E-02                 | 2.04                 |
| 228707_at        | CLDN23         | 4.53E-02                 | 2.23                 |
| 205269_at        | LCP2           | 4.54E-02                 | -2.45                |
| 210982_s_at      | HLA-DRA        | 4.55E-02                 | -2.18                |
| 203665_at        | HMOX1          | 4.56E-02                 | -4.76                |
| 218247_s_at      | MEX3C          | 4.56E-02                 | 2.13                 |
| 33494_at         | ETFDH          | 4.56E-02                 | -2.24                |
| 204301_at        | KBTD11         | 4.57E-02                 | -14.17               |
| 209466_x_at      | PTN            | 4.58E-02                 | -2.22                |
| 219113_x_at      | HSD17B14       | 4.58E-02                 | 2.64                 |
| 223040_at        | NAT5           | 4.58E-02                 | 3.52                 |
| 202495_at        | TBCC           | 4.59E-02                 | 3.56                 |
| 226324_s_at      | IFT172         | 4.59E-02                 | 2.51                 |
| 229742_at        | C15orf61       | 4.59E-02                 | 2.37                 |
| 244455_at        | KCNT2          | 4.59E-02                 | -2.90                |
| 206643_at        | HAL            | 4.60E-02                 | -13.22               |
| 233924_s_at      | EXOC6          | 4.60E-02                 | 2.01                 |
| 212724_at        | RND3           | 4.61E-02                 | -4.89                |
| 209233_at        | EMG1           | 4.62E-02                 | 3.54                 |
| 203967_at        | CDC6           | 4.63E-02                 | 4.91                 |

| Affy<br>Probe ID | Gene<br>Symbol | Paired T-test<br>p-value | Fold Change<br>T / N |
|------------------|----------------|--------------------------|----------------------|
| 235071_at        | WDR92          | 4.63E-02                 | 2.08                 |
| 1566785_x_at     | LOC728806      | 4.64E-02                 | 2.09                 |
| 201066_at        | CYC1           | 4.64E-02                 | 2.49                 |
| 209662_at        | CETN3          | 4.64E-02                 | 2.03                 |
| 43427_at         | ACACB          | 4.64E-02                 | -2.12                |
| 209188_x_at      | DR1            | 4.65E-02                 | 2.11                 |
| 218361_at        | GOLPH3L        | 4.66E-02                 | 4.29                 |
| 202670_at        | MAP2K1         | 4.68E-02                 | -2.60                |
| 200636_s_at      | PTPRF          | 4.69E-02                 | 2.11                 |
| 227598_at        | C7orf29        | 4.69E-02                 | 2.35                 |
| 231663_s_at      | ARG1           | 4.69E-02                 | -2.13                |
| 209891_at        | SPC25          | 4.70E-02                 | 3.48                 |
| 211609_x_at      | PSMD4          | 4.70E-02                 | 3.59                 |
| 213869_x_at      | THY1           | 4.71E-02                 | 2.48                 |
| 201109_s_at      | THBS1          | 4.72E-02                 | -3.89                |
| 160020_at        | MMP14          | 4.73E-02                 | 2.31                 |
| 206150_at        | CD27           | 4.73E-02                 | -2.14                |
| 211776_s_at      | EPB41L3        | 4.74E-02                 | -3.21                |
| 214597_at        | SSTR2          | 4.74E-02                 | -2.47                |
| 206441_s_at      | COMMD4         | 4.75E-02                 | 2.30                 |
| 231776_at        | EOMES          | 4.75E-02                 | -2.10                |
| 202961_s_at      | ATP5J2         | 4.76E-02                 | 2.06                 |
| 232012_at        | CAPN1          | 4.76E-02                 | 2.11                 |
| 235979_at        | C7             | 4.76E-02                 | -4.49                |
| 201683_x_at      | TOX4           | 4.77E-02                 | 2.82                 |
| 206102_at        | GIN51          | 4.77E-02                 | 11.91                |
| 208650_s_at      | CD24           | 4.77E-02                 | 9.05                 |
| 220391_at        | ZBTB3          | 4.77E-02                 | 2.28                 |
| 222025_s_at      | OPLAH          | 4.77E-02                 | 2.04                 |
| 227529_s_at      | AKAP12         | 4.77E-02                 | -3.85                |
| 209835_x_at      | CD44           | 4.78E-02                 | -2.00                |
| 218516_s_at      | IMPAD1         | 4.78E-02                 | 2.06                 |
| 219203_at        | FAM158A        | 4.78E-02                 | 3.55                 |
| 226485_at        | FLJ20674       | 4.78E-02                 | 6.16                 |
| 225390_s_at      | KLF13          | 4.79E-02                 | 2.97                 |
| 205930_at        | GTF2E1         | 4.80E-02                 | 2.26                 |
| 202184_s_at      | NUP133         | 4.81E-02                 | 2.09                 |
| 208891_at        | DUSP6          | 4.81E-02                 | -4.29                |
| 214098_at        | KIAA1107       | 4.82E-02                 | 3.26                 |
| 230871_at        | DHX30          | 4.82E-02                 | 3.03                 |
| 217814_at        | CCDC47         | 4.83E-02                 | 2.28                 |
| 218524_at        | E4F1           | 4.83E-02                 | 2.30                 |
| 228868_x_at      | CDT1           | 4.83E-02                 | 3.26                 |
| 200661_at        | CTSA           | 4.84E-02                 | 3.72                 |
| 225235_at        | TSPAN17        | 4.84E-02                 | 2.70                 |
| 225394_s_at      | ZCRB1          | 4.84E-02                 | 2.28                 |
| 202168_at        | TAF9           | 4.85E-02                 | 2.76                 |
| 207907_at        | TNFSF14        | 4.85E-02                 | -13.65               |
| 208894_at        | HLA-DRA        | 4.85E-02                 | -2.36                |
| 210649_s_at      | ARID1A         | 4.85E-02                 | 2.10                 |
| 214328_s_at      | HSP90AA1       | 4.85E-02                 | 2.08                 |
| 217907_at        | MRPL18         | 4.85E-02                 | 2.30                 |
| 224513_s_at      | UBQLN4         | 4.85E-02                 | 2.70                 |
| 227174_at        | WDR72          | 4.85E-02                 | -7.63                |
| 230024_at        | AARS2          | 4.85E-02                 | 4.32                 |
| 242169_at        | BHMT2          | 4.85E-02                 | 2.12                 |
| 204103_at        | CCL4           | 4.86E-02                 | -4.06                |
| 213302_at        | PFAS           | 4.86E-02                 | 2.42                 |
| 222668_at        | KCTD15         | 4.86E-02                 | -3.86                |
| 206507_at        | ZSCAN12        | 4.87E-02                 | 3.87                 |
| 225442_at        | DDR2           | 4.87E-02                 | -2.37                |
| 212137_at        | LARP1          | 4.88E-02                 | 2.09                 |
| 226129_at        | FAM83H         | 4.88E-02                 | 8.09                 |
| 226241_s_at      | MRPL52         | 4.88E-02                 | 2.18                 |
| 202510_s_at      | TNFAIP2        | 4.89E-02                 | -2.17                |
| 202628_s_at      | SERPINE1       | 4.89E-02                 | -9.98                |
| 220800_s_at      | TMOD3          | 4.89E-02                 | 4.03                 |
| 239377_at        | EIF1AD         | 4.89E-02                 | 2.11                 |
| 214889_at        | FAM149A        | 4.91E-02                 | -3.92                |
| 204998_s_at      | ATF5           | 4.92E-02                 | -8.52                |
| 213681_at        | CYHR1          | 4.92E-02                 | 2.26                 |

| Affy<br>Probe ID | Gene<br>Symbol | Paired T-test<br>p-value | Fold Change<br>T / N |
|------------------|----------------|--------------------------|----------------------|
| 213910_at        | IGFBP7         | 4.92E-02                 | -2.62                |
| 218460_at        | HEATR2         | 4.93E-02                 | 2.47                 |
| 221522_at        | ANKRD27        | 4.94E-02                 | 3.94                 |
| 209096_at        | UBE2V2         | 4.95E-02                 | 2.23                 |
| 218073_s_at      | TMEM48         | 4.95E-02                 | 3.79                 |
| 222347_at        | LOC644450      | 4.96E-02                 | 11.82                |
| 266_s_at         | CD24           | 4.96E-02                 | 6.27                 |
| 205463_s_at      | PDGFA          | 4.98E-02                 | 3.18                 |
| 217897_at        | FXVD6          | 4.98E-02                 | -2.83                |
| 218718_at        | PDGFC          | 4.98E-02                 | -2.36                |
| 224464_s_at      | NUDT22         | 4.98E-02                 | 2.06                 |
| 201415_at        | GSS            | 4.99E-02                 | 3.12                 |
| 201599_at        | OAT            | 4.99E-02                 | -7.63                |
| 203017_s_at      | SSX2IP         | 4.99E-02                 | 2.15                 |
| 219953_s_at      | C11orf17       | 4.99E-02                 | 2.33                 |
| 228272_at        | DNLZ           | 4.99E-02                 | 2.26                 |

Supplementary Table S5. Predicted targets and enrichment score of 10 random miRNA sets

| miRNA           | predicted target count |    |    |    |    |    | Total | Fisher's Exact p-value |          |          |          |          |          |
|-----------------|------------------------|----|----|----|----|----|-------|------------------------|----------|----------|----------|----------|----------|
|                 | C1                     | C2 | C3 | C4 | C5 | C6 |       | C1                     | C2       | C3       | C4       | C5       | C6       |
| RS1_let-7a      | 6                      | 3  | 1  | 6  | 13 | 4  | 33    | 3.49E-02               | 8.02E-01 | 7.25E-01 | 1.00E+00 | 2.11E-03 | 2.61E-01 |
| RS1_miR-148a    | 5                      | 9  | 1  | 12 | 9  | 20 | 56    | 6.00E-01               | 3.22E-01 | 3.85E-01 | 4.12E-01 | 7.24E-01 | 3.81E-02 |
| RS1_miR-188-3p  | 3                      | 2  | 3  | 8  | 11 | 15 | 42    | 1.00E+00               | 1.33E-01 | 7.59E-01 | 1.00E+00 | 1.75E-01 | 1.55E-01 |
| RS1_miR-526b    | 1                      | 9  | 6  | 16 | 6  | 11 | 49    | 2.66E-01               | 1.30E-01 | 5.46E-02 | 1.02E-02 | 8.48E-01 | 7.49E-01 |
| RS1_miR-660     | 6                      | 7  | 0  | 3  | 5  | 7  | 28    | 2.36E-02               | 1.05E-01 | 2.67E-01 | 3.83E-01 | 8.13E-01 | 8.47E-01 |
| RS1_miR-95      | 0                      | 0  | 0  | 2  | 3  | 3  | 8     | 1.00E+00               | 1.00E+00 | 1.00E+00 | 1.80E-01 | 2.86E-02 | 7.38E-02 |
| RS2_miR-1       | 5                      | 9  | 2  | 15 | 8  | 15 | 54    | 4.41E-01               | 3.13E-01 | 7.73E-01 | 9.26E-02 | 1.00E+00 | 3.73E-01 |
| RS2_miR-140-3p  | 4                      | 5  | 0  | 15 | 7  | 17 | 48    | 7.90E-01               | 8.37E-01 | 7.74E-02 | 6.11E-02 | 1.00E+00 | 1.29E-01 |
| RS2_miR-208b    | 1                      | 1  | 0  | 4  | 8  | 9  | 23    | 1.00E+00               | 7.32E-01 | 6.31E-01 | 5.78E-01 | 8.18E-03 | 3.99E-02 |
| RS2_miR-217     | 5                      | 6  | 7  | 14 | 5  | 18 | 55    | 5.99E-01               | 1.00E+00 | 4.36E-02 | 1.83E-01 | 2.87E-01 | 1.04E-01 |
| RS2_miR-423-5p  | 3                      | 7  | 1  | 8  | 5  | 5  | 29    | 1.00E+00               | 3.64E-01 | 5.22E-01 | 8.50E-01 | 8.39E-01 | 1.79E-01 |
| RS2_miR-550     | 4                      | 4  | 3  | 4  | 4  | 10 | 29    | 3.27E-01               | 1.00E+00 | 4.71E-01 | 5.38E-01 | 8.25E-01 | 4.65E-01 |
| RS3_miR-142-5p  | 16                     | 19 | 6  | 23 | 21 | 32 | 117   | 3.68E-03               | 7.85E-02 | 1.00E+00 | 2.76E-01 | 1.91E-01 | 8.27E-02 |
| RS3_miR-15b     | 11                     | 14 | 4  | 20 | 10 | 26 | 85    | 2.34E-02               | 1.21E-01 | 1.00E+00 | 6.62E-02 | 7.61E-01 | 3.11E-02 |
| RS3_miR-183     | 3                      | 6  | 5  | 9  | 4  | 7  | 34    | 1.00E+00               | 6.52E-01 | 1.10E-01 | 5.74E-01 | 4.22E-01 | 5.07E-01 |
| RS3_miR-214     | 6                      | 13 | 1  | 10 | 5  | 14 | 49    | 4.79E-01               | 9.75E-02 | 1.89E-01 | 7.62E-01 | 1.05E-01 | 1.00E+00 |
| RS3_miR-23b     | 12                     | 17 | 4  | 19 | 13 | 39 | 104   | 1.29E-01               | 2.47E-01 | 4.11E-01 | 1.00E+00 | 4.39E-01 | 2.68E-02 |
| RS3_miR-362-5p  | 5                      | 6  | 1  | 8  | 5  | 10 | 35    | 9.02E-02               | 3.03E-01 | 1.00E+00 | 3.94E-01 | 1.00E+00 | 3.44E-01 |
| RS4_miR-151-5p  | 0                      | 1  | 1  | 0  | 0  | 0  | 2     | 1.00E+00               | 5.66E-01 | 3.34E-01 | 6.37E-01 | 6.29E-01 | 4.10E-01 |
| RS4_miR-299-3p  | 3                      | 6  | 0  | 5  | 6  | 9  | 29    | 4.86E-01               | 2.81E-01 | 2.67E-01 | 1.00E+00 | 4.76E-01 | 4.31E-01 |
| RS4_miR-34c-5p  | 4                      | 4  | 2  | 15 | 3  | 14 | 42    | 7.82E-01               | 5.32E-01 | 1.00E+00 | 3.68E-02 | 1.29E-01 | 3.51E-01 |
| RS4_miR-452     | 10                     | 12 | 1  | 18 | 10 | 25 | 76    | 1.36E-01               | 5.21E-01 | 6.31E-02 | 4.20E-01 | 4.71E-01 | 1.52E-01 |
| RS4_miR-196b    | 6                      | 3  | 1  | 2  | 6  | 5  | 23    | 8.84E-03               | 1.00E+00 | 1.00E+00 | 3.34E-01 | 2.84E-01 | 1.00E+00 |
| RS4_miR-19a     | 6                      | 7  | 4  | 22 | 6  | 28 | 73    | 8.24E-01               | 6.09E-01 | 1.00E+00 | 2.42E-02 | 9.46E-02 | 1.16E-02 |
| RS5_miR-107     | 5                      | 6  | 1  | 17 | 3  | 16 | 48    | 4.22E-01               | 1.00E+00 | 3.75E-01 | 1.54E-02 | 9.54E-02 | 1.72E-01 |
| RS5_miR-146b-5p | 3                      | 5  | 2  | 9  | 4  | 17 | 40    | 1.00E+00               | 1.00E+00 | 1.00E+00 | 5.80E-01 | 4.24E-01 | 3.03E-02 |
| RS5_miR-18b     | 1                      | 5  | 1  | 6  | 8  | 9  | 30    | 1.00E+00               | 2.67E-01 | 1.00E+00 | 4.84E-01 | 7.00E-02 | 2.10E-01 |
| RS5_miR-299-5p  | 2                      | 6  | 4  | 16 | 2  | 12 | 42    | 1.00E+00               | 4.59E-01 | 1.69E-01 | 7.89E-04 | 1.87E-01 | 1.53E-01 |
| RS5_miR-421     | 6                      | 9  | 4  | 14 | 18 | 22 | 73    | 8.24E-01               | 1.00E+00 | 1.00E+00 | 8.88E-01 | 6.67E-02 | 2.11E-01 |
| RS5_miR-510     | 2                      | 7  | 1  | 8  | 8  | 4  | 30    | 1.00E+00               | 2.36E-01 | 7.30E-01 | 5.56E-01 | 3.91E-01 | 1.57E-01 |
| RS6_let-7g      | 6                      | 2  | 1  | 5  | 12 | 4  | 30    | 3.53E-02               | 4.47E-01 | 7.25E-01 | 8.36E-01 | 5.92E-03 | 2.62E-01 |
| RS6_miR-1       | 5                      | 9  | 2  | 15 | 8  | 15 | 54    | 4.41E-01               | 3.13E-01 | 7.73E-01 | 9.26E-02 | 1.00E+00 | 3.73E-01 |
| RS6_miR-126     | 0                      | 0  | 0  | 0  | 1  | 1  | 2     | 1.00E+00               | 1.00E+00 | 1.00E+00 | 1.00E+00 | 1.29E-01 | 1.84E-01 |
| RS6_miR-127-3p  | 0                      | 1  | 0  | 0  | 0  | 0  | 1     | 1.00E+00               | 2.68E-01 | 1.00E+00 | 1.00E+00 | 1.00E+00 | 1.00E+00 |
| RS6_miR-143     | 3                      | 5  | 2  | 10 | 7  | 14 | 41    | 1.00E+00               | 8.36E-01 | 7.71E-01 | 7.30E-01 | 1.00E+00 | 3.61E-01 |
| RS6_miR-625     | 3                      | 11 | 4  | 10 | 7  | 21 | 56    | 6.30E-01               | 1.90E-01 | 7.88E-01 | 8.77E-01 | 5.04E-01 | 7.01E-02 |
| RS7_miR-181a    | 8                      | 18 | 7  | 28 | 14 | 40 | 115   | 6.92E-01               | 6.89E-02 | 5.19E-01 | 1.14E-02 | 1.00E+00 | 1.93E-04 |
| RS7_miR-214     | 6                      | 13 | 1  | 10 | 5  | 14 | 49    | 4.79E-01               | 9.75E-02 | 1.89E-01 | 7.62E-01 | 1.05E-01 | 1.00E+00 |
| RS7_miR-455-3p  | 4                      | 4  | 4  | 11 | 3  | 6  | 32    | 3.58E-01               | 1.00E+00 | 2.92E-01 | 1.13E-01 | 2.93E-01 | 4.84E-01 |
| RS7_miR-532-5p  | 4                      | 7  | 2  | 8  | 6  | 10 | 37    | 3.67E-01               | 2.47E-01 | 1.00E+00 | 6.95E-01 | 1.00E+00 | 6.04E-01 |
| RS7_miR-876-5p  | 4                      | 6  | 6  | 7  | 12 | 14 | 49    | 7.97E-01               | 1.00E+00 | 1.41E-01 | 5.06E-01 | 2.07E-01 | 5.54E-01 |
| RS7_miR-877     | 2                      | 4  | 1  | 5  | 5  | 8  | 25    | 1.00E+00               | 7.86E-01 | 1.00E+00 | 1.00E+00 | 8.09E-01 | 5.52E-01 |
| RS8_miR-18b     | 1                      | 5  | 1  | 6  | 8  | 9  | 30    | 1.00E+00               | 2.68E-01 | 1.00E+00 | 4.85E-01 | 7.05E-02 | 2.11E-01 |
| RS8_miR-335     | 3                      | 4  | 4  | 6  | 6  | 11 | 34    | 7.69E-01               | 1.00E+00 | 3.09E-01 | 8.48E-01 | 1.00E+00 | 4.96E-01 |
| RS8_miR-9       | 8                      | 10 | 4  | 12 | 6  | 20 | 60    | 6.94E-02               | 2.41E-01 | 5.86E-01 | 5.19E-01 | 4.84E-01 | 5.97E-02 |
| RS8_miR-92b     | 5                      | 7  | 6  | 7  | 10 | 13 | 48    | 4.01E-01               | 5.31E-01 | 6.77E-02 | 7.26E-01 | 3.41E-01 | 4.38E-01 |
| RS8_miR-96      | 2                      | 6  | 3  | 11 | 7  | 10 | 39    | 5.88E-01               | 1.00E+00 | 7.68E-01 | 3.86E-01 | 1.00E+00 | 8.77E-01 |
| RS8_miR-202     | 2                      | 2  | 1  | 9  | 4  | 10 | 28    | 1.00E+00               | 5.92E-01 | 1.00E+00 | 1.16E-01 | 1.00E+00 | 2.31E-01 |
| RS9_miR-142-3p  | 4                      | 3  | 2  | 4  | 3  | 10 | 26    | 1.17E-01               | 1.00E+00 | 6.68E-01 | 1.00E+00 | 1.00E+00 | 8.70E-02 |
| RS9_miR-146a    | 3                      | 5  | 2  | 9  | 4  | 17 | 40    | 1.00E+00               | 1.00E+00 | 1.00E+00 | 5.77E-01 | 4.23E-01 | 2.97E-02 |
| RS9_miR-149     | 5                      | 7  | 1  | 8  | 3  | 12 | 36    | 2.48E-01               | 3.81E-01 | 5.24E-01 | 8.54E-01 | 1.68E-01 | 4.16E-01 |
| RS9_miR-33b     | 3                      | 4  | 2  | 10 | 6  | 14 | 39    | 1.00E+00               | 6.69E-01 | 1.00E+00 | 5.96E-01 | 8.49E-01 | 3.45E-01 |
| RS9_miR-502-3p  | 3                      | 6  | 2  | 2  | 6  | 11 | 30    | 4.47E-01               | 1.49E-01 | 6.76E-01 | 2.48E-01 | 3.12E-01 | 5.74E-02 |
| RS9_miR-532-3p  | 4                      | 3  | 5  | 8  | 9  | 12 | 41    | 7.85E-01               | 2.96E-01 | 2.28E-01 | 8.65E-01 | 5.79E-01 | 7.61E-01 |
| RSJ_miR-143     | 3                      | 5  | 2  | 10 | 7  | 14 | 41    | 1.00E+00               | 8.36E-01 | 7.71E-01 | 7.30E-01 | 1.00E+00 | 4.42E-01 |
| RSJ_miR-187     | 0                      | 0  | 0  | 1  | 3  | 3  | 7     | 1.00E+00               | 1.00E+00 | 1.00E+00 | 1.00E+00 | 6.00E-02 | 1.44E-01 |
| RSJ_miR-26b     | 5                      | 13 | 3  | 16 | 14 | 25 | 76    | 8.12E-01               | 9.70E-02 | 1.00E+00 | 2.24E-01 | 1.92E-01 | 1.00E-02 |
| RSJ_miR-30b     | 6                      | 15 | 6  | 27 | 16 | 30 | 100   | 1.00E+00               | 2.82E-01 | 8.26E-01 | 1.49E-02 | 6.80E-01 | 5.37E-02 |
| RSJ_miR-499-5p  | 3                      | 3  | 4  | 10 | 6  | 15 | 41    | 1.00E+00               | 3.83E-01 | 3.53E-01 | 4.71E-01 | 8.48E-01 | 1.47E-01 |
| RSJ_miR-106b    | 4                      | 15 | 1  | 22 | 15 | 35 | 92    | 5.28E-01               | 1.43E-01 | 6.31E-02 | 7.91E-02 | 5.61E-01 | 4.59E-04 |





| GeneGO Object Name                  | Mapped Gene Symbol                  | Molecular Function | DEGs | Predicted Targets † | miRNA Subnetwork**   | Betweenness |        | # of Interactions (Degree) |    |     |         |
|-------------------------------------|-------------------------------------|--------------------|------|---------------------|----------------------|-------------|--------|----------------------------|----|-----|---------|
|                                     |                                     |                    |      |                     |                      | Value       | Rank*  | Total                      | In | Out | Rank*   |
| MYOD                                | MYOD1                               | TF                 |      |                     | 101, 139-5p, 199a-3p | 1944.44     | 16.33% | 16                         | 6  | 10  | 7.46%   |
| ATR                                 | ATR                                 |                    |      |                     |                      | 1845.45     | 16.46% | 5                          | 2  | 3   | 24.08%  |
| IGF-1 receptor                      | IGF1R                               |                    |      |                     |                      | 1837.09     | 16.60% | 10                         | 1  | 9   | 9.01%   |
| Rac1                                | RAC1                                |                    |      | 101                 |                      | 1818.00     | 16.73% | 6                          | 3  | 3   | 24.08%  |
| Bcl-2                               | BCL2                                |                    |      | 139-5p              | 101, 139-5p          | 1813.22     | 16.87% | 3                          | 2  | 1   | 52.82%  |
| PAK1                                | PAK1                                |                    |      |                     |                      | 1808.69     | 17.01% | 2                          | 1  | 1   | 52.82%  |
| GATA-3                              | GATA3                               | TF                 |      |                     | 199a-3p              | 1803.64     | 17.14% | 5                          | 1  | 4   | 18.17%  |
| OGG1                                | OGG1                                |                    | ✓    |                     |                      | 1794.14     | 17.28% | 10                         | 10 | 0   | 100.00% |
| IL-4                                | IL4                                 |                    |      |                     | 101, 139-5p, 199a-3p | 1781.53     | 17.41% | 7                          | 5  | 2   | 34.37%  |
| IL-18                               | IL18                                |                    |      |                     | 101, 139-5p          | 1781.30     | 17.55% | 3                          | 2  | 1   | 52.82%  |
| TIF1-alpha                          | TRIM24                              | EPIGENES           | ✓    | 101, 139-5p         | 101, 139-5p, 199a-3p | 1751.55     | 17.59% | 12                         | 6  | 6   | 14.08%  |
| ABT1                                | ABT1                                |                    | ✓    |                     |                      | 1742.88     | 17.82% | 4                          | 3  | 1   | 52.82%  |
| ERK5 (MAPK7)                        | MAPK7                               |                    |      |                     |                      | 1736.16     | 17.96% | 4                          | 2  | 2   | 34.37%  |
| Rad51                               | RAD51                               |                    |      |                     |                      | 1705.49     | 18.10% | 3                          | 2  | 1   | 52.82%  |
| Karyopherin alpha 3                 | KPNA3                               |                    |      |                     |                      | 1701.13     | 18.23% | 3                          | 2  | 1   | 52.82%  |
| STAT4                               | STAT4                               | TF                 |      |                     | 101, 139-5p          | 1688.37     | 18.37% | 7                          | 4  | 3   | 24.08%  |
| BMP2                                | BMP2                                |                    |      |                     | 199a-3p              | 1681.77     | 18.50% | 10                         | 6  | 4   | 18.17%  |
| NLK                                 | NLK                                 |                    | ✓    | 101, 199-3p         | 199a-3p              | 1678.09     | 18.64% | 13                         | 7  | 6   | 14.08%  |
| Nucleophosmin                       | NPM1                                |                    |      |                     |                      | 1672.67     | 18.78% | 6                          | 3  | 3   | 24.08%  |
| XBP1                                | XBP1                                | TF                 |      |                     | 101, 139-5p          | 1669.79     | 18.91% | 5                          | 2  | 3   | 24.08%  |
| HIPK2                               | HIPK2                               |                    |      |                     |                      | 1663.11     | 19.05% | 5                          | 3  | 2   | 34.37%  |
| hnRNP K                             | HNRNPK                              |                    |      |                     |                      | 1655.62     | 19.18% | 4                          | 2  | 2   | 34.37%  |
| MCM2                                | MCM2                                |                    | ✓    |                     | 101, 139-5p          | 1649.51     | 19.32% | 15                         | 14 | 1   | 52.82%  |
| Raptor                              | RPTOR                               |                    |      |                     | 101, 139-5p          | 1640.80     | 19.46% | 3                          | 2  | 1   | 52.82%  |
| PAKAP                               | ADCYAP1                             |                    |      | 101                 | 101, 139-5p          | 1577.55     | 19.59% | 5                          | 3  | 2   | 34.37%  |
| IKK-gamma                           | IKBK5                               |                    |      |                     |                      | 1575.90     | 19.73% | 6                          | 4  | 2   | 34.37%  |
| YY1                                 | YY1                                 | TF                 |      |                     | 101, 139-5p, 199a-3p | 1545.87     | 19.86% | 11                         | 4  | 7   | 11.55%  |
| SERTAD1                             | SERTAD1                             |                    |      |                     |                      | 1489.82     | 20.00% | 2                          | 1  | 1   | 52.82%  |
| FOXp3                               | FOXp3                               | TF                 |      |                     | 101, 139-5p          | 1487.35     | 20.14% | 7                          | 2  | 5   | 15.92%  |
| RET                                 | RET                                 |                    |      |                     |                      | 1475.98     | 20.27% | 3                          | 2  | 1   | 52.82%  |
| SMAD5                               | SMAD5                               | TF                 | ✓    |                     | 199a-3p              | 1453.86     | 20.41% | 18                         | 12 | 6   | 14.08%  |
| FOXO3A                              | FOXO3                               | TF                 |      |                     | 101, 139-5p          | 1431.97     | 20.54% | 9                          | 3  | 6   | 14.08%  |
| SAT-1                               | SLC26A1                             |                    |      |                     | 101, 139-5p, 199a-3p | 1401.61     | 20.68% | 9                          | 9  | 0   | 100.00% |
| MEK4(MAP2K4)                        | MAP2K4                              |                    |      |                     | 101, 139-5p          | 1376.40     | 20.82% | 5                          | 4  | 1   | 52.82%  |
| IRF1                                | IRF1                                | TF                 |      |                     |                      | 1371.98     | 20.95% | 8                          | 3  | 5   | 15.92%  |
| WNT5A                               | WNT5A                               |                    |      |                     | 101, 139-5p, 199a-3p | 1366.63     | 21.09% | 6                          | 4  | 2   | 34.37%  |
| VEGF-D                              | FIGF                                |                    |      | 139-5p              | 101, 139-5p          | 1338.77     | 21.22% | 5                          | 3  | 2   | 34.37%  |
| FAK1                                | PTK2                                |                    |      |                     |                      | 1335.75     | 21.36% | 10                         | 6  | 4   | 18.17%  |
| MYOG                                | MYOG                                | TF                 |      |                     | 101, 139-5p, 199a-3p | 1303.52     | 21.50% | 9                          | 5  | 4   | 18.17%  |
| UFO                                 | AXL                                 |                    | ✓    | 139-5p              | 101, 139-5p          | 1301.98     | 21.63% | 8                          | 6  | 2   | 34.37%  |
| ZNF148                              | ZNF148                              | TF                 | ✓    |                     |                      | 1300.69     | 21.77% | 17                         | 3  | 14  | 4.93%   |
| ATAD2                               | ATAD2                               | EPIGENES           | ✓    |                     | 101, 139-5p          | 1259.51     | 21.90% | 12                         | 5  | 7   | 11.55%  |
| PC4                                 | SUB1                                |                    | ✓    | 101                 | 101, 139-5p, 199a-3p | 1250.22     | 22.04% | 11                         | 6  | 5   | 15.92%  |
| microRNA 155                        | miR-155                             |                    |      |                     | 101, 139-5p          | 1243.62     | 22.18% | 3                          | 1  | 2   | 34.37%  |
| Galpha(s)-specific calcitonin GPCRs | Galpha(s)-specific calcitonin GPCRs |                    |      |                     |                      | 1228.82     | 22.31% | 6                          | 3  | 3   | 24.08%  |
| Sortilin                            | Sortilin                            |                    | ✓    |                     | 101, 139-5p          | 1225.98     | 22.45% | 4                          | 4  | 0   | 100.00% |
| IL-2                                | IL2                                 |                    |      |                     | 101, 139-5p          | 1211.11     | 22.59% | 4                          | 3  | 1   | 52.82%  |
| CCL2                                | CCL2                                |                    |      |                     |                      | 1201.70     | 22.72% | 4                          | 3  | 1   | 52.82%  |
| NCOA1 (SRC1)                        | NCOA1                               | EPIGENES           |      |                     |                      | 1201.47     | 22.86% | 10                         | 4  | 6   | 14.08%  |
| Prolactin                           | PRL                                 |                    |      |                     | 101, 139-5p          | 1195.18     | 22.99% | 6                          | 4  | 2   | 34.37%  |
| TTF1                                | TTF1                                |                    | ✓    |                     | 101, 139-5p          | 1187.73     | 23.13% | 8                          | 6  | 2   | 34.37%  |
| MRK                                 | ICK                                 |                    |      | 101, 139-5p         | 101, 139-5p          | 1186.23     | 23.27% | 5                          | 3  | 2   | 34.37%  |
| IL-8                                | IL8                                 |                    |      |                     |                      | 1184.42     | 23.40% | 5                          | 4  | 1   | 52.82%  |
| Endothelin-1                        | EDN1                                |                    |      |                     |                      | 1156.50     | 23.54% | 8                          | 5  | 3   | 24.08%  |
| FGF2                                | FGF2                                |                    | ✓    | 199-3p              | 101, 139-5p, 199a-3p | 1147.69     | 23.67% | 11                         | 10 | 1   | 52.82%  |
| PRMT5                               | PRMT5                               | EPIGENES           | ✓    |                     |                      | 1142.29     | 23.81% | 13                         | 3  | 10  | 7.46%   |
| Progesterone receptor               | PGR                                 | TF                 |      |                     | 101, 139-5p, 199a-3p | 1142.14     | 23.95% | 10                         | 8  | 2   | 34.37%  |
| alpha-3/beta-1 integrin             | alpha-3/beta-1 integrin             |                    |      |                     | 101, 139-5p, 199a-3p | 1124.28     | 24.08% | 5                          | 4  | 1   | 52.82%  |
| MAPKAPK5                            | MAPKAPK5                            |                    | ✓    |                     | 101, 139-5p          | 1100.77     | 24.22% | 8                          | 5  | 3   | 24.08%  |
| ENA-78                              | ENA-78                              |                    |      |                     |                      | 1095.85     | 24.35% | 4                          | 3  | 1   | 52.82%  |
| Caspase-9                           | CASP9                               |                    |      |                     |                      | 1094.16     | 24.49% | 2                          | 1  | 1   | 52.82%  |
| VEGFR-2                             | KDR                                 |                    |      |                     | 101, 139-5p          | 1092.16     | 24.63% | 12                         | 8  | 4   | 18.17%  |
| Urocortin                           | UCN                                 |                    |      |                     |                      | 1091.34     | 24.76% | 2                          | 1  | 1   | 52.82%  |
| EWS/FLI1 fusion protein             | EWS/FLI1 fusion protein             |                    |      |                     |                      | 1088.48     | 24.90% | 9                          | 2  | 7   | 11.55%  |
| Neurotrophin-1                      | NRP1                                |                    |      | 101                 |                      | 1069.29     | 25.03% | 7                          | 5  | 2   | 34.37%  |
| BAT3                                | BAT3                                |                    | ✓    |                     | 101, 139-5p          | 1065.73     | 25.17% | 8                          | 5  | 3   | 24.08%  |
| Epo receptor                        | EPOR                                |                    |      |                     |                      | 1052.18     | 25.31% | 8                          | 1  | 7   | 11.55%  |
| c-Abl                               | ABL1                                |                    |      |                     | 101, 139-5p          | 1046.51     | 25.44% | 4                          | 1  | 3   | 24.08%  |
| HMGB2                               | HMGB2                               | EPIGENES           | ✓    |                     |                      | 1038.67     | 25.58% | 11                         | 6  | 5   | 15.92%  |
| 40kD2                               | POU2F1                              |                    |      |                     |                      | 1025.45     | 25.71% | 14                         | 1  | 13  | 5.49%   |
| TfIIe, alpha subunit                | GTF2E1                              | TF                 |      | 101                 | 101, 139-5p          | 1011.62     | 25.85% | 8                          | 6  | 2   | 34.37%  |
| TMF1                                | TMF1                                |                    | ✓    | 101, 139-5p         | 101, 139-5p          | 1009.53     | 25.99% | 7                          | 4  | 3   | 24.08%  |
| Aggrecanase-2                       | ADAMTS5                             |                    | ✓    | 101                 |                      | 1005.74     | 26.12% | 11                         | 7  | 4   | 18.17%  |
| CDK2                                | CDK2                                |                    |      |                     | 101, 139-5p          | 1005.14     | 26.26% | 11                         | 4  | 7   | 11.55%  |
| OAS2                                | OAS2                                |                    | ✓    |                     |                      | 997.19      | 26.39% | 7                          | 7  | 0   | 100.00% |
| GATA-4                              | GATA4                               | TF                 |      |                     | 101, 139-5p          | 996.67      | 26.53% | 8                          | 3  | 5   | 15.92%  |
| UHRF1                               | UHRF1                               | TF                 | ✓    |                     |                      | 981.94      | 26.67% | 12                         | 5  | 7   | 11.55%  |
| POLA1                               | POLA1                               |                    | ✓    |                     | 101, 139-5p          | 966.91      | 26.80% | 10                         | 10 | 0   | 100.00% |
| ERR3                                | ESRRG                               | TF                 | ✓    | 139-5p              | 101, 139-5p          | 960.94      | 26.94% | 17                         | 7  | 10  | 7.46%   |
| 14-3-3 zeta/delta                   | YWHAZ                               |                    |      |                     | 101, 139-5p, 199a-3p | 933.72      | 27.07% | 5                          | 3  | 2   | 34.37%  |
| TRAF2                               | TRAF2                               |                    |      |                     |                      | 932.80      | 27.21% | 8                          | 2  | 6   | 14.08%  |
| Cystatin A                          | CSTA                                |                    |      |                     | 101, 139-5p          | 918.24      | 27.35% | 4                          | 1  | 3   | 24.08%  |
| GATA-1                              | GATA1                               | TF                 |      |                     | 199a-3p              | 905.18      | 27.48% | 14                         | 3  | 11  | 6.34%   |
| PROX1                               | PROX1                               | TF                 | ✓    |                     |                      | 895.04      | 27.62% | 10                         | 5  | 5   | 15.92%  |
| BRG1                                | SMARCA4                             | EPIGENES           | ✓    | 101                 |                      | 876.26      | 27.76% | 11                         | 2  | 9   | 9.01%   |
| IL-5                                | IL5                                 |                    |      |                     | 101, 139-5p          | 853.93      | 27.89% | 2                          | 1  | 1   | 52.82%  |
| PMGE                                | BPGM                                |                    | ✓    |                     |                      | 849.97      | 28.03% | 5                          | 5  | 0   | 100.00% |
| PPARGC1 (PGC-1-alpha)               | PPARGC1A                            |                    |      | 139-5p              | 101, 139-5p          | 838.33      | 28.16% | 10                         | 7  | 3   | 24.08%  |
| RUNX2                               | RUNX2                               | TF                 |      |                     | 101, 139-5p          | 819.46      | 28.30% | 15                         | 7  | 8   | 10.99%  |
| MCM5                                | MCM5                                |                    | ✓    |                     |                      | 812.44      | 28.44% | 14                         | 12 | 2   | 34.37%  |
| NF-AT1(NFATC2)                      | NFATC2                              | TF                 |      |                     |                      | 801.74      | 28.57% | 5                          | 2  | 3   | 24.08%  |
| H-Ras                               | HRAS                                |                    |      |                     | 101, 139-5p          | 800.67      | 28.71% | 6                          | 2  | 4   | 18.17%  |
| TGF-beta receptor type I            | TGFBR1                              |                    |      | 101                 |                      | 794.70      | 28.84% | 7                          | 3  | 4   | 18.17%  |
| TGF-beta receptor type II           | TGFBR2                              |                    |      |                     | 101, 139-5p          | 794.11      | 28.98% | 10                         | 7  | 3   | 24.08%  |
| Neprilysin                          | MME                                 |                    | ✓    |                     |                      | 786.11      | 29.12% | 10                         | 7  | 3   | 24.08%  |
| alpha-V/beta-3 integrin             | alpha-V/beta-3 integrin             |                    |      |                     | 101, 139-5p          | 773.35      | 29.25% | 6                          | 5  | 1   | 52.82%  |
| TGF-beta 1                          | TGFBI                               |                    |      | 139-5p              | 101, 139-5p, 199a-3p | 772.28      | 29.39% | 8                          | 6  | 2   | 34.37%  |
| E2F8                                | E2F8                                | TF                 | ✓    |                     |                      | 770.38      | 29.52% | 7                          | 4  | 3   | 24.08%  |
| FKHR                                | FOXO1                               | TF                 |      |                     | 101, 139-5p          | 763.45      | 29.66% | 9                          | 3  | 6   | 14.08%  |
| MAFG                                | MAFG                                | TF                 |      |                     | 101, 139-5p          | 757.29      | 29.80% | 8                          | 5  | 3   | 24.08%  |
| G-protein alpha-q/11                | G-protein alpha-q/11                |                    |      |                     | 101, 139-5p          | 750.93      | 29.93% | 4                          | 3  | 1   | 52.82%  |
| ACACB                               | ACACB                               |                    | ✓    |                     | 101, 139-5p, 199a-3p | 747.67      | 30.07% | 13                         | 13 | 0   | 100.00% |
| AP-2A                               | TFAP2A                              | TF                 |      |                     |                      | 744.50      | 30.20% | 9                          | 1  | 8   | 10.99%  |
| Pc2                                 | CBX4                                | EPIGENES           | ✓    |                     |                      | 741.64      | 30.34% | 10                         | 4  | 6   | 14.08%  |
| G-protein alpha-s                   | GNAS                                |                    |      |                     |                      | 733.27      | 30.48% | 4                          | 3  | 1   | 52.82%  |
| AKT(PKB)                            | AKT(PKB)                            |                    |      |                     | 101, 139-5p          | 725.41      | 30.61% | 7                          | 3  | 4   | 18.17%  |
| Cystatin B                          | CSTB                                |                    |      |                     | 101, 139-5p          | 724.13      | 30.75% | 3                          | 1  | 2   | 34.37%  |
| SSAT                                | SAT1                                |                    | ✓    |                     | 101, 139-5p          | 723.63      | 30.88% | 13                         | 11 | 2   | 34.37%  |
| EGFR                                | EGFR                                |                    |      |                     |                      | 717.74      | 31.02% | 8                          | 4  | 4   |         |

| GeneGO Object Name          | Mapped Gene Symbol          | Molecular Function | DEGs | Predicted Targets † | miRNA Subnetwork**   | Betweenness |        | # of Interactions (Degree) |    |     |         |
|-----------------------------|-----------------------------|--------------------|------|---------------------|----------------------|-------------|--------|----------------------------|----|-----|---------|
|                             |                             |                    |      |                     |                      | Value       | Rank*  | Total                      | In | Out | Rank*   |
| ZNF302                      | ZNF302                      |                    | ✓    | 139-5p              | 101, 139-5p          | 678.05      | 32.65% | 7                          | 7  | 0   | 100.00% |
| SALL4                       | SALL4                       |                    |      |                     |                      | 675.71      | 32.79% | 9                          | 3  | 6   | 14.08%  |
| DR1                         | DR1                         |                    | ✓    | 101                 |                      | 672.90      | 32.93% | 4                          | 3  | 1   | 52.82%  |
| E2f1                        | UBE2I                       |                    |      |                     |                      | 672.65      | 33.06% | 9                          | 2  | 7   | 11.55%  |
| C/EBPalpha                  | CEBPA                       | TF                 |      | 101                 | 101, 139-5p          | 658.67      | 33.20% | 12                         | 5  | 7   | 11.55%  |
| N-Myc                       | MYCN                        | TF                 |      | 101                 |                      | 656.29      | 33.33% | 11                         | 3  | 8   | 10.99%  |
| DNMT3A                      | DNMT3A                      | EPIGENES           |      | 101, 199-3p         | 199a-3p              | 649.24      | 33.47% | 8                          | 5  | 3   | 24.08%  |
| VEGFR-3                     | FLT4                        |                    |      |                     | 101, 139-5p          | 645.81      | 33.61% | 8                          | 5  | 3   | 24.08%  |
| Enkephalin A                | PENK                        |                    |      |                     |                      | 641.39      | 33.74% | 2                          | 1  | 1   | 52.82%  |
| HNF3-beta                   | FOXA2                       | TF                 |      | 101, 139-5p         | 101, 139-5p          | 624.98      | 33.88% | 12                         | 3  | 9   | 9.01%   |
| IL-9                        | IL9                         |                    |      |                     |                      | 621.14      | 34.01% | 2                          | 1  | 1   | 52.82%  |
| CDK11                       | CDK19                       |                    | ✓    |                     |                      | 601.10      | 34.15% | 5                          | 2  | 3   | 24.08%  |
| PU.1                        | SPI1                        | TF                 |      |                     | 101, 139-5p          | 590.40      | 34.29% | 11                         | 2  | 9   | 9.01%   |
| HDAC1                       | HDAC1                       | EPIGENES           |      |                     |                      | 577.09      | 34.42% | 10                         | 3  | 7   | 11.55%  |
| Collagen IV                 | Collagen IV                 |                    |      |                     | 101, 139-5p, 199a-3p | 566.13      | 34.56% | 5                          | 3  | 2   | 34.37%  |
| E2F2                        | E2F2                        | TF                 |      |                     |                      | 564.13      | 34.69% | 11                         | 2  | 9   | 9.01%   |
| MEK1(MAP2K1)                | MAP2K1                      |                    |      |                     |                      | 557.77      | 34.83% | 4                          | 3  | 1   | 52.82%  |
| Bcl-6                       | BCL6                        | TF                 |      |                     |                      | 553.47      | 34.97% | 7                          | 3  | 4   | 18.17%  |
| IL-1 beta                   | IL1B                        |                    |      |                     | 101, 139-5p          | 548.79      | 35.10% | 7                          | 4  | 3   | 24.08%  |
| RAIDD                       | CRADD                       |                    |      |                     |                      | 539.29      | 35.24% | 2                          | 1  | 1   | 52.82%  |
| SMAD4                       | SMAD4                       | TF                 |      |                     |                      | 528.35      | 35.37% | 9                          | 4  | 5   | 15.92%  |
| NCOA2 (GRIP1/TIF2)          | NCOA2                       |                    |      |                     |                      | 520.37      | 35.51% | 5                          | 2  | 3   | 24.08%  |
| PLK3 (CNK)                  | PLK3                        |                    | ✓    |                     | 199a-3p              | 516.90      | 35.65% | 6                          | 3  | 3   | 24.08%  |
| PNRC1                       | PNRC1                       |                    |      | 101, 199-3p         | 199a-3p              | 514.27      | 35.78% | 7                          | 6  | 1   | 52.82%  |
| ARID4B                      | ARID4B                      |                    | ✓    | 101, 199-3p         | 199a-3p              | 506.25      | 35.92% | 6                          | 5  | 1   | 52.82%  |
| TARBP1                      | TARBP1                      |                    |      |                     | 101, 139-5p          | 499.54      | 36.05% | 7                          | 6  | 1   | 52.82%  |
| NF-AT2(NFATC1)              | NFATC1                      | TF                 |      | 139-5p              | 101, 139-5p          | 489.02      | 36.19% | 4                          | 2  | 2   | 34.37%  |
| SDF-1                       | CXCL12                      |                    |      |                     | 199a-3p              | 484.09      | 36.33% | 7                          | 6  | 1   | 52.82%  |
| PKC-alpha                   | PRKCA                       |                    |      | 139-5p              | 101, 139-5p          | 482.12      | 36.46% | 3                          | 2  | 1   | 52.82%  |
| GABP alpha                  | GABPA                       | TF                 |      |                     | 101, 139-5p          | 481.68      | 36.60% | 4                          | 2  | 2   | 34.37%  |
| Bra1                        | BRCA1                       |                    |      |                     | 101, 139-5p          | 472.38      | 36.73% | 6                          | 4  | 2   | 34.37%  |
| SMAD9 (SMAD8)               | SMAD9                       | TF                 |      |                     | 199a-3p              | 471.34      | 36.87% | 10                         | 7  | 3   | 24.08%  |
| TIP30                       | HTATIP2                     |                    | ✓    |                     | 101, 139-5p          | 462.40      | 37.01% | 7                          | 1  | 6   | 14.08%  |
| APEX                        | APEX1                       |                    |      |                     | 101, 139-5p          | 461.09      | 37.14% | 6                          | 3  | 3   | 24.08%  |
| AATC                        | GOT1                        |                    | ✓    |                     | 101, 139-5p          | 458.61      | 37.28% | 8                          | 8  | 0   | 100.00% |
| TFIIH                       | TFIIH                       |                    |      |                     | 101, 139-5p, 199a-3p | 457.89      | 37.41% | 6                          | 4  | 2   | 34.37%  |
| CDC42                       | CDC42                       | EPIGENES           |      | 139-5p              | 101, 139-5p          | 451.17      | 37.55% | 3                          | 1  | 2   | 34.37%  |
| HDAC2                       | HDAC2                       |                    |      |                     |                      | 451.00      | 37.69% | 6                          | 2  | 4   | 18.17%  |
| HUTH                        | HAL                         |                    | ✓    |                     |                      | 449.74      | 37.82% | 7                          | 7  | 0   | 100.00% |
| ATF-5                       | ATF5                        | TF                 | ✓    |                     |                      | 447.98      | 37.96% | 8                          | 3  | 5   | 15.92%  |
| SHP-2                       | PTPN11                      |                    |      |                     | 101, 139-5p          | 445.82      | 38.10% | 5                          | 3  | 2   | 34.37%  |
| MEF2D                       | MEF2D                       | TF                 |      |                     |                      | 442.33      | 38.23% | 4                          | 2  | 2   | 34.37%  |
| CD40L(TNFSF5)               | CD40LG                      |                    |      |                     |                      | 435.64      | 38.37% | 3                          | 2  | 1   | 52.82%  |
| VAV-1                       | VAV1                        | TF                 |      |                     |                      | 433.83      | 38.50% | 4                          | 2  | 2   | 34.37%  |
| CrkL                        | CRKL                        |                    |      |                     |                      | 433.24      | 38.64% | 5                          | 4  | 1   | 52.82%  |
| CAPER                       | RBM39                       |                    | ✓    |                     |                      | 432.89      | 38.78% | 8                          | 4  | 4   | 18.17%  |
| IL-12 receptor              | IL-12 receptor              |                    |      |                     |                      | 432.55      | 38.91% | 4                          | 2  | 2   | 34.37%  |
| PDGF-A                      | PDGFA                       |                    |      |                     | 101, 139-5p          | 430.56      | 39.05% | 3                          | 2  | 1   | 52.82%  |
| MDM2                        | MDM2                        |                    |      |                     | 101, 139-5p          | 429.24      | 39.18% | 8                          | 7  | 1   | 52.82%  |
| HMG1/Y                      | HMG1                        | EPIGENES           |      |                     | 101, 139-5p          | 422.36      | 39.32% | 7                          | 4  | 3   | 24.08%  |
| PCNA                        | PCNA                        |                    |      |                     | 101, 139-5p          | 416.98      | 39.46% | 5                          | 3  | 2   | 34.37%  |
| EPAS1                       | EPAS1                       | TF                 |      | 199-3p              | 199a-3p              | 412.26      | 39.59% | 6                          | 2  | 4   | 18.17%  |
| Ataxin-1                    | ATXN1                       |                    |      | 101, 139-5p         | 101, 139-5p          | 411.99      | 39.73% | 3                          | 2  | 1   | 52.82%  |
| KLF13                       | KLF13                       |                    | ✓    | 199-3p              | 101, 139-5p          | 411.87      | 39.86% | 8                          | 5  | 3   | 24.08%  |
| Somatotropin                | GH1                         |                    |      |                     |                      | 411.69      | 40.00% | 4                          | 2  | 2   | 34.37%  |
| SREBP1 (nuclear)            | SREBP1 (nuclear)            | TF                 |      |                     |                      | 411.63      | 40.14% | 6                          | 2  | 4   | 18.17%  |
| DJ-1                        | PARK7                       |                    |      |                     | 101, 139-5p          | 407.99      | 40.27% | 3                          | 2  | 1   | 52.82%  |
| VDR                         | VDR                         | TF                 |      |                     | 101, 139-5p          | 406.22      | 40.41% | 8                          | 5  | 3   | 24.08%  |
| TFIID 31 kDa subunit        | TAF9                        |                    | ✓    |                     |                      | 405.01      | 40.54% | 8                          | 4  | 4   | 18.17%  |
| TRAP230                     | MED12                       |                    | ✓    |                     |                      | 402.56      | 40.68% | 8                          | 4  | 4   | 18.17%  |
| JDP2                        | JDP2                        | TF                 | ✓    | 101                 | 101, 139-5p          | 400.60      | 40.82% | 10                         | 4  | 6   | 14.08%  |
| IRS-1                       | IRS1                        |                    |      |                     |                      | 400.34      | 40.95% | 6                          | 2  | 4   | 18.17%  |
| CYLD                        | CYLD                        |                    |      | 101                 |                      | 399.92      | 41.09% | 3                          | 2  | 1   | 52.82%  |
| ZNF331                      | ZNF331                      |                    |      | 139-5p              | 101, 139-5p          | 397.80      | 41.22% | 4                          | 4  | 0   | 100.00% |
| ID1                         | ID1                         |                    |      |                     | 101, 139-5p          | 396.89      | 41.36% | 8                          | 7  | 1   | 52.82%  |
| PSF                         | SFPQ                        |                    |      | 101                 | 101, 139-5p          | 394.94      | 41.50% | 4                          | 3  | 1   | 52.82%  |
| QKI                         | QKI                         |                    | ✓    | 101, 199-3p         | 199a-3p              | 394.10      | 41.63% | 5                          | 4  | 1   | 52.82%  |
| SMAD7                       | SMAD7                       | TF                 |      |                     | 101, 139-5p          | 387.79      | 41.77% | 6                          | 5  | 1   | 52.82%  |
| SOS                         | SOS                         |                    |      |                     | 101, 139-5p          | 380.71      | 41.90% | 6                          | 3  | 3   | 24.08%  |
| Sly                         | SRV                         | TF                 |      |                     | 101, 139-5p          | 373.44      | 42.04% | 4                          | 1  | 3   | 24.08%  |
| DKK1                        | DKK1                        |                    |      |                     | 199a-3p              | 373.13      | 42.18% | 5                          | 4  | 1   | 52.82%  |
| Adrenomedullin              | ADM                         |                    |      |                     | 101, 139-5p          | 365.72      | 42.31% | 3                          | 2  | 1   | 52.82%  |
| SNAIL1                      | SNAIL1                      |                    |      |                     | 101, 139-5p          | 361.80      | 42.45% | 6                          | 5  | 1   | 52.82%  |
| GAB1                        | GAB1                        |                    |      |                     | 101, 139-5p          | 359.24      | 42.59% | 4                          | 3  | 1   | 52.82%  |
| VEGFR-1                     | FLT1                        |                    |      |                     |                      | 358.75      | 42.72% | 6                          | 3  | 3   | 24.08%  |
| Syk                         | SYK                         |                    |      |                     |                      | 358.04      | 42.86% | 7                          | 3  | 4   | 18.17%  |
| MAP3K3                      | MAP3K3                      |                    |      |                     | 101, 139-5p          | 353.48      | 42.99% | 3                          | 2  | 1   | 52.82%  |
| TNF-R1                      | TNFRSF1A                    |                    |      |                     |                      | 347.90      | 43.13% | 2                          | 1  | 1   | 52.82%  |
| SMAD2                       | SMAD2                       | TF                 |      | 139-5p              | 101, 139-5p          | 344.83      | 43.27% | 6                          | 4  | 2   | 34.37%  |
| IL-12                       | IL-12                       |                    |      |                     | 101, 139-5p          | 335.66      | 43.40% | 3                          | 2  | 1   | 52.82%  |
| PAX3                        | PAX3                        | TF                 |      |                     | 101, 139-5p, 199a-3p | 332.82      | 43.54% | 6                          | 5  | 1   | 52.82%  |
| alpha-5/beta-1 integrin     | alpha-5/beta-1 integrin     |                    |      |                     | 101, 139-5p          | 326.77      | 43.67% | 7                          | 4  | 3   | 24.08%  |
| Laminin 1                   | Laminin 1                   |                    |      |                     |                      | 325.89      | 43.81% | 5                          | 3  | 2   | 34.37%  |
| HoxC13                      | HOXC13                      | TF                 |      |                     | 199a-3p              | 320.73      | 43.95% | 4                          | 3  | 1   | 52.82%  |
| CXCR4                       | CXCR4                       |                    |      | 139-5p              | 101, 139-5p          | 319.59      | 44.08% | 4                          | 2  | 2   | 34.37%  |
| ELF3                        | ELF3                        | TF                 |      |                     | 101, 139-5p          | 319.09      | 44.22% | 2                          | 2  | 2   | 34.37%  |
| PKA-cat beta                | PRKACB                      |                    |      | 139-5p              | 101, 139-5p          | 316.74      | 44.35% | 4                          | 3  | 1   | 52.82%  |
| Paxillin                    | PXN                         |                    |      |                     |                      | 311.23      | 44.49% | 4                          | 3  | 1   | 52.82%  |
| microRNA 21                 | miR-21                      |                    |      |                     | 101, 139-5p          | 310.45      | 44.63% | 5                          | 2  | 3   | 24.08%  |
| TBP                         | TBP                         | TF                 |      |                     | 199a-3p              | 307.08      | 44.76% | 3                          | 2  | 1   | 52.82%  |
| GFRalpha2                   | GFRA2                       |                    |      |                     |                      | 307.04      | 44.90% | 2                          | 1  | 1   | 52.82%  |
| IL-13                       | IL13                        |                    |      | 101                 |                      | 306.08      | 45.03% | 4                          | 3  | 1   | 52.82%  |
| I-kB                        | I-kB                        |                    |      |                     | 101, 139-5p          | 305.70      | 45.17% | 7                          | 4  | 3   | 24.08%  |
| TR4                         | NR2C2                       | TF                 | ✓    |                     |                      | 305.03      | 45.31% | 9                          | 4  | 5   | 15.92%  |
| p130                        | RBL2                        |                    |      | 101                 |                      | 304.56      | 45.44% | 6                          | 3  | 3   | 24.08%  |
| FOXF1                       | FOXF1                       | TF                 |      |                     | 199a-3p              | 304.06      | 45.58% | 5                          | 4  | 1   | 52.82%  |
| ELAVL1 (HuR)                | ELAVL1                      |                    |      |                     | 101, 139-5p          | 303.28      | 45.71% | 7                          | 3  | 4   | 18.17%  |
| BMP7                        | BMP7                        |                    |      |                     | 199a-3p              | 303.18      | 45.85% | 4                          | 2  | 2   | 34.37%  |
| ELF1                        | ELF1                        | TF                 |      |                     | 101, 139-5p          | 299.67      | 45.99% | 4                          | 1  | 3   | 24.08%  |
| Importin (karyopherin)-beta | Importin (karyopherin)-beta |                    |      |                     | 101, 139-5p          | 299.05      | 46.12% | 4                          | 3  | 1   | 52.82%  |
| IL-2 receptor               | IL-2 receptor               |                    |      |                     |                      | 298.71      | 46.26% | 5                          | 1  | 4   | 18.17%  |
| CENP-50                     | MLF1IP                      |                    | ✓    |                     | 199a-3p              | 296.89      | 46.39% | 5                          | 5  | 0   | 100.00% |
| ckrox                       | ZBTB7B                      | TF                 | ✓    |                     |                      | 294.63      | 46.53% | 5                          | 2  | 3   | 24.08%  |
| SOX9                        | SOX9                        | TF                 |      | 101                 |                      | 288.07      | 46.67% | 6                          | 4  | 2   | 34.37%  |
| Golgin-45 (BLZF1)           | BLZF1                       | TF                 | ✓    |                     | 101, 139-5p          | 287.62      | 46.80% | 9                          | 8  | 1   | 52.82%  |
| FKBP8                       | FKBP8                       |                    |      |                     |                      | 282.34      | 46.94% | 4                          | 2  | 2   | 34.37%  |
| ZNF451                      | ZNF451                      |                    | ✓    | 101                 |                      | 281.51      | 47.07% | 3                          | 2  | 1   | 52.82%  |
| Leptin                      | LEP                         |                    |      |                     | 101, 139-5p          | 281.44      | 47.21% | 3                          | 2  | 1   | 52.82%  |
| Epo                         | EPO                         |                    |      |                     |                      | 281.39      | 47.35% | 2                          | 1  | 1   | 52.82%  |
| BMPR1B                      | BMPR1B                      |                    |      |                     |                      | 280.03      | 47.48% | 7                          | 4  | 3   | 24.08%  |
| GATA-6                      | GATA6                       | TF                 |      |                     | 199a-3p              | 278.96      |        |                            |    |     |         |

| GeneGO Object Name                      | Mapped Gene Symbol       | Molecular Function | DEGs | Predicted Targets † | miRNA Subnetwork**   | Betweenness |        | # of Interactions (Degree) |    |     |         |
|-----------------------------------------|--------------------------|--------------------|------|---------------------|----------------------|-------------|--------|----------------------------|----|-----|---------|
|                                         |                          |                    |      |                     |                      | Value       | Rank*  | Total                      | In | Out | Rank*   |
| PML                                     | PML                      |                    |      |                     |                      | 240.56      | 48.98% | 4                          | 1  | 3   | 24.08%  |
| ErbB2                                   | ERBB2                    |                    |      |                     | 101, 139-5p          | 237.07      | 49.12% | 3                          | 1  | 2   | 34.37%  |
| IL-4R type II                           | IL4R type II             |                    |      |                     | 199a-3p              | 236.74      | 49.25% | 4                          | 3  | 1   | 52.82%  |
| NOTCH1 (NICD)                           | NOTCH1 (NICD)            |                    |      |                     | 101, 139-5p          | 235.03      | 49.39% | 4                          | 3  | 1   | 52.82%  |
| CCNE1                                   | CCNE1                    |                    |      |                     | 101, 139-5p          | 232.94      | 49.52% | 8                          | 6  | 2   | 34.37%  |
| ITF2                                    | TCF4                     | TF                 |      |                     |                      | 230.52      | 49.66% | 4                          | 2  | 2   | 34.37%  |
| WWP1                                    | WWP1                     |                    | ✓    |                     |                      | 230.14      | 49.80% | 9                          | 0  | 9   | 9.01%   |
| GSTM1                                   | GSTM1                    |                    |      |                     |                      | 229.82      | 49.93% | 4                          | 2  | 2   | 34.37%  |
| E4F1                                    | E4F1                     | TF                 | ✓    |                     | 199a-3p              | 229.42      | 50.07% | 8                          | 4  | 4   | 18.17%  |
| CTBP2                                   | CTBP2                    |                    |      |                     | 101, 139-5p          | 226.58      | 50.20% | 4                          | 3  | 1   | 52.82%  |
| Ephrin-A5                               | EFRNA5                   |                    |      |                     |                      | 225.51      | 50.34% | 2                          | 1  | 1   | 52.82%  |
| FOXF2                                   | FOXF2                    | TF                 |      |                     |                      | 219.58      | 50.48% | 4                          | 2  | 2   | 34.37%  |
| SLC38A1                                 | SLC38A1                  |                    |      | 199-3p              | 199a-3p              | 218.06      | 50.61% | 4                          | 4  | 0   | 100.00% |
| ACM3                                    | CHRM3                    |                    |      |                     | 101, 139-5p          | 217.40      | 50.75% | 4                          | 3  | 1   | 52.82%  |
| Granzyme B                              | GZMB                     |                    |      |                     | 101, 139-5p          | 215.00      | 50.88% | 5                          | 2  | 3   | 24.08%  |
| DCK                                     | DCK                      |                    | ✓    |                     |                      | 214.36      | 51.02% | 5                          | 5  | 0   | 100.00% |
| Cathepsin A                             | CTSA                     |                    | ✓    |                     |                      | 212.49      | 51.16% | 4                          | 2  | 2   | 34.37%  |
| IFN-beta                                | IFNB1                    |                    |      |                     |                      | 210.52      | 51.29% | 2                          | 1  | 1   | 52.82%  |
| P4HA1                                   | P4HA1                    |                    | ✓    |                     |                      | 208.88      | 51.43% | 8                          | 8  | 0   | 100.00% |
| PDGF-R-alpha                            | PDGFRA                   |                    |      | 199-3p              | 199a-3p              | 208.79      | 51.56% | 3                          | 2  | 1   | 52.82%  |
| NRF2                                    | NFE2L2                   | TF                 |      | 101                 |                      | 207.65      | 51.70% | 7                          | 3  | 4   | 18.17%  |
| ELL2                                    | ELL2                     |                    |      | 139-5p              | 101, 139-5p          | 201.50      | 51.84% | 5                          | 5  | 0   | 100.00% |
| RUVBL2                                  | RUVBL2                   |                    | ✓    |                     |                      | 200.76      | 51.97% | 6                          | 3  | 3   | 24.08%  |
| HGK(MAP4K4)                             | MAP4K4                   |                    |      |                     |                      | 199.95      | 52.11% | 3                          | 1  | 2   | 34.37%  |
| PPP2R5A                                 | PPP2R5A                  |                    | ✓    |                     |                      | 197.85      | 52.24% | 2                          | 0  | 2   | 34.37%  |
| c-MPL                                   | MPL                      |                    |      | 199-3p              | 199a-3p              | 196.52      | 52.38% | 3                          | 2  | 1   | 52.82%  |
| CDYL                                    | CDYL                     | EPIGENES           |      |                     | 101, 139-5p          | 196.52      | 52.52% | 6                          | 6  | 0   | 100.00% |
| ZNF207                                  | ZNF207                   | TF                 | ✓    | 101                 |                      | 196.39      | 52.65% | 2                          | 2  | 0   | 100.00% |
| GCK(MAP4K2)                             | MAP4K2                   |                    |      |                     |                      | 195.66      | 52.79% | 3                          | 1  | 2   | 34.37%  |
| MSX1                                    | MSX1                     | TF                 |      | 101                 | 101, 139-5p          | 193.27      | 52.93% | 4                          | 3  | 1   | 52.82%  |
| PARP-1                                  | PARP1                    |                    |      |                     |                      | 191.72      | 53.06% | 4                          | 1  | 3   | 24.08%  |
| B-Raf                                   | BRAF                     |                    |      |                     |                      | 190.82      | 53.20% | 5                          | 2  | 3   | 24.08%  |
| EGF                                     | EGF                      |                    |      |                     | 101, 139-5p          | 190.33      | 53.33% | 3                          | 1  | 2   | 34.37%  |
| CRK                                     | CRK                      |                    |      |                     |                      | 188.22      | 53.47% | 3                          | 2  | 1   | 52.82%  |
| Bax                                     | BAX                      |                    |      |                     | 101, 139-5p          | 185.29      | 53.61% | 3                          | 1  | 2   | 34.37%  |
| RIP140                                  | NRIP1                    |                    |      |                     | 199-3p               | 184.30      | 53.74% | 5                          | 3  | 2   | 34.37%  |
| ROR-alpha                               | RORA                     | TF                 |      |                     |                      | 183.38      | 53.88% | 6                          | 4  | 2   | 34.37%  |
| Ski                                     | SKI                      |                    |      |                     | 101, 139-5p          | 180.59      | 54.01% | 5                          | 1  | 4   | 18.17%  |
| p15                                     | CDKN2B                   |                    |      |                     | 199a-3p              | 178.80      | 54.15% | 4                          | 3  | 1   | 52.82%  |
| ZNF189                                  | ZNF189                   | TF                 | ✓    |                     | 199a-3p              | 174.20      | 54.29% | 6                          | 6  | 0   | 100.00% |
| HMG2A                                   | HMG2A                    | EPIGENES           |      |                     |                      | 173.42      | 54.42% | 4                          | 2  | 2   | 34.37%  |
| MSH6                                    | MSH6                     |                    |      |                     | 101, 139-5p          | 173.25      | 54.56% | 2                          | 1  | 1   | 52.82%  |
| Cathepsin V                             | CTSL1                    |                    | ✓    |                     | 101, 139-5p          | 172.75      | 54.69% | 4                          | 4  | 0   | 100.00% |
| Cystatin C                              | CST3                     |                    |      |                     |                      | 172.16      | 54.83% | 3                          | 1  | 2   | 34.37%  |
| Tat (HIV-1)                             | Tat (HIV-1)              |                    |      |                     |                      | 171.21      | 54.97% | 5                          | 2  | 3   | 24.08%  |
| Vitronectin                             | VTN                      |                    |      |                     |                      | 170.13      | 55.10% | 4                          | 3  | 1   | 52.82%  |
| HSP27                                   | HSPB1                    |                    |      |                     | 101, 139-5p, 199a-3p | 169.72      | 55.24% | 6                          | 5  | 1   | 52.82%  |
| SF1                                     | NR5A1                    | TF                 |      |                     |                      | 168.14      | 55.37% | 4                          | 3  | 1   | 52.82%  |
| MITF                                    | MITF                     | TF                 |      | 101                 | 101, 139-5p          | 165.50      | 55.51% | 6                          | 5  | 1   | 52.82%  |
| SMRT                                    | NCOR2                    |                    |      |                     |                      | 164.76      | 55.65% | 5                          | 1  | 4   | 18.17%  |
| BMAL1                                   | ARNTL                    | TF                 |      |                     | 101, 139-5p          | 164.02      | 55.78% | 4                          | 2  | 2   | 34.37%  |
| SHP-1                                   | PTPN6                    |                    |      |                     | 101, 139-5p          | 163.38      | 55.92% | 4                          | 2  | 2   | 34.37%  |
| MYF5                                    | MYF5                     | TF                 |      |                     | 101, 139-5p          | 162.86      | 56.05% | 3                          | 2  | 1   | 52.82%  |
| ZNRF2                                   | ZNRF2                    |                    | ✓    | 101, 199-3p         | 199a-3p              | 162.62      | 56.19% | 4                          | 3  | 1   | 52.82%  |
| Amyloid beta                            | Amyloid beta             |                    |      |                     |                      | 162.00      | 56.33% | 3                          | 2  | 1   | 52.82%  |
| TGT                                     | USP14                    |                    | ✓    | 101                 |                      | 159.36      | 56.46% | 4                          | 3  | 1   | 52.82%  |
| GLI-3                                   | GLI3                     | TF                 |      |                     |                      | 157.28      | 56.60% | 3                          | 1  | 2   | 34.37%  |
| TFIID 30 kDa subunit                    | TAF10                    | TF                 | ✓    |                     |                      | 156.85      | 56.73% | 3                          | 1  | 2   | 34.37%  |
| C14orf169                               | C14orf169                |                    | ✓    |                     | 199a-3p              | 154.93      | 56.87% | 4                          | 1  | 3   | 24.08%  |
| HB-EGF                                  | HBEFG                    |                    |      |                     | 101, 139-5p          | 154.73      | 57.01% | 3                          | 2  | 1   | 52.82%  |
| FOXP1                                   | FOXP1                    | TF                 |      | 139-5p, 199-3p      | 101, 139-5p, 199a-3p | 153.28      | 57.14% | 4                          | 3  | 1   | 52.82%  |
| IL-22                                   | IL22                     |                    |      |                     | 199a-3p              | 152.88      | 57.28% | 4                          | 3  | 1   | 52.82%  |
| ARHGAP15                                | ARHGAP15                 |                    | ✓    |                     | 199a-3p              | 152.67      | 57.41% | 3                          | 2  | 1   | 52.82%  |
| PAX6                                    | PAX6                     | TF                 |      |                     |                      | 151.69      | 57.55% | 5                          | 3  | 2   | 34.37%  |
| TrkA                                    | NTRK1                    |                    |      |                     | 101, 139-5p          | 151.10      | 57.69% | 3                          | 2  | 1   | 52.82%  |
| Pin1                                    | PIN1                     |                    |      |                     |                      | 149.62      | 57.82% | 5                          | 3  | 2   | 34.37%  |
| TIMP1                                   | TIMP1                    |                    |      |                     | 101, 139-5p          | 149.41      | 57.96% | 5                          | 3  | 2   | 34.37%  |
| NFATC2IP                                | NFATC2IP                 |                    | ✓    |                     |                      | 147.24      | 58.10% | 4                          | 3  | 1   | 52.82%  |
| RD protein                              | RDBP                     |                    | ✓    |                     |                      | 146.89      | 58.23% | 4                          | 3  | 1   | 52.82%  |
| CDK3                                    | CDK3                     |                    |      |                     |                      | 144.75      | 58.37% | 2                          | 1  | 1   | 52.82%  |
| IRF4                                    | IRF4                     | TF                 |      |                     | 101, 139-5p          | 142.31      | 58.50% | 3                          | 2  | 1   | 34.37%  |
| DNMT1                                   | DNMT1                    | EPIGENES           |      |                     | 101, 139-5p, 199a-3p | 139.44      | 58.64% | 6                          | 4  | 2   | 34.37%  |
| p19                                     | CDKN2D                   |                    |      |                     |                      | 139.43      | 58.78% | 3                          | 2  | 1   | 52.82%  |
| DAPK1                                   | DAPK1                    |                    |      |                     | 101, 139-5p          | 138.33      | 58.91% | 5                          | 3  | 2   | 34.37%  |
| IL-1RI                                  | IL1R1                    |                    |      | 101                 |                      | 137.50      | 59.05% | 3                          | 2  | 1   | 52.82%  |
| SHP                                     | NR0B2                    | TF                 |      |                     | 101, 139-5p          | 137.17      | 59.18% | 9                          | 5  | 4   | 18.17%  |
| Cathepsin D                             | CTSD                     |                    |      |                     |                      | 136.24      | 59.32% | 4                          | 3  | 1   | 52.82%  |
| Pitx2                                   | PITX2                    | TF                 |      |                     |                      | 133.41      | 59.46% | 2                          | 1  | 1   | 52.82%  |
| CIITA                                   | CIITA                    | EPIGENES           |      |                     | 101, 139-5p          | 133.25      | 59.59% | 6                          | 5  | 1   | 52.82%  |
| TAFI48                                  | TAF1A                    |                    | ✓    |                     | 101, 139-5p, 199a-3p | 132.46      | 59.73% | 5                          | 5  | 0   | 100.00% |
| Huntingtin                              | HTT                      |                    |      |                     |                      | 132.26      | 59.86% | 5                          | 1  | 4   | 18.17%  |
| HNF1-beta                               | HNF1B                    | TF                 |      |                     |                      | 129.56      | 60.00% | 2                          | 1  | 1   | 52.82%  |
| UBF                                     | UBF                      |                    |      |                     | 101, 139-5p          | 129.28      | 60.14% | 3                          | 1  | 2   | 34.37%  |
| H0XB3                                   | H0XB3                    | TF                 |      | 139-5p              | 101, 139-5p          | 128.68      | 60.27% | 3                          | 2  | 1   | 52.82%  |
| HDA3                                    | HDA3                     | EPIGENES           |      |                     |                      | 127.74      | 60.41% | 6                          | 3  | 3   | 24.08%  |
| Casain kinase II, alpha chain (CSNK2A1) | CSNK2A1                  |                    |      |                     |                      | 126.31      | 60.54% | 4                          | 1  | 3   | 52.82%  |
| CSF1                                    | CSF1                     |                    |      |                     |                      | 125.96      | 60.68% | 5                          | 4  | 1   | 52.82%  |
| Chk1                                    | CHEK1                    |                    |      |                     |                      | 123.39      | 60.82% | 2                          | 1  | 1   | 52.82%  |
| Protein kinase G1 alpha                 | PRKG1                    |                    |      |                     | 199a-3p              | 121.81      | 60.95% | 5                          | 3  | 2   | 34.37%  |
| RUNX3                                   | RUNX3                    | TF                 |      |                     |                      | 121.74      | 61.09% | 4                          | 3  | 1   | 52.82%  |
| ERM                                     | ETV5                     | TF                 |      | 101                 | 101, 139-5p          | 121.10      | 61.22% | 4                          | 3  | 1   | 52.82%  |
| ZNF306                                  | ZKSCAN3                  | TF                 | ✓    |                     |                      | 120.54      | 61.36% | 6                          | 1  | 5   | 15.92%  |
| alpha-11/beta-1 integrin                | alpha-11/beta-1 integrin |                    |      |                     | 101, 139-5p          | 118.97      | 61.50% | 4                          | 3  | 1   | 52.82%  |
| BLIMP1 (PRDI-BF1)                       | PRDM1                    | EPIGENES           |      |                     |                      | 118.81      | 61.63% | 3                          | 2  | 1   | 52.82%  |
| MNK2(GPRK7)                             | MKNK2                    |                    | ✓    |                     | 199a-3p              | 118.59      | 61.77% | 5                          | 3  | 2   | 34.37%  |
| JMJD2A                                  | KDM4A                    | EPIGENES           |      |                     | 101, 139-5p          | 118.48      | 61.90% | 3                          | 1  | 2   | 34.37%  |
| ZAP70                                   | ZAP70                    |                    |      |                     | 101, 139-5p          | 117.66      | 62.04% | 4                          | 3  | 1   | 52.82%  |
| Btk                                     | BTK                      |                    |      |                     |                      | 116.72      | 62.18% | 3                          | 2  | 1   | 52.82%  |
| AUF1                                    | HNRNP                    |                    |      |                     | 199-3p               | 115.83      | 62.31% | 3                          | 1  | 2   | 34.37%  |
| PKC-lambda/ota                          | PRKC1                    |                    |      |                     | 101, 139-5p, 199a-3p | 114.64      | 62.45% | 4                          | 3  | 1   | 52.82%  |
| PLAU (LIPA)                             | PLAU                     |                    |      |                     |                      | 113.79      | 62.59% | 4                          | 3  | 1   | 52.82%  |
| IKK (cat)                               | IKK (cat)                |                    |      |                     |                      | 113.60      | 62.72% | 4                          | 2  | 2   | 34.37%  |
| Pdx-1 (IPF1)                            | PDX1                     | TF                 |      |                     |                      | 111.47      | 62.86% | 4                          | 2  | 2   | 34.37%  |
| ASF1A                                   | ASF1A                    | EPIGENES           | ✓    | 139-5p              | 101, 139-5p          | 108.94      | 62.99% | 2                          | 2  | 0   | 100.00% |
| HSP90                                   | HSP90                    |                    |      |                     | 199a-3p              | 108.48      | 63.13% | 4                          | 2  | 2   | 34.37%  |
| Collagen I                              | Collagen I               |                    |      |                     |                      | 108.45      | 63.27% | 4                          | 3  | 1   | 52.82%  |
| TOP1                                    | TOP1                     |                    |      | 139-5p              | 101, 139-5p          | 108.14      | 63.40% | 3                          | 2  | 1   | 52.82%  |
| Insulin receptor                        | INSR                     |                    |      |                     |                      | 107.51      | 63.54% | 3                          | 1  | 2   | 34.37%  |
| NEUR1                                   | NEU1                     |                    | ✓    |                     | 199a-3p              | 106.91      | 63.67% | 4                          | 4  | 0   | 100.00% |
| NCOA3 (pCIP/SRC3)                       | NCOA3                    | EPIGENES           |      |                     |                      | 106.88      | 63.81% | 5                          | 2  | 3   | 24.08%  |
| Ep-CAM                                  | EPCAM                    |                    |      |                     | 199a-3p              | 106.35      | 63.95% | 4                          | 2  | 2   | 34.37%  |
| TRADD                                   | TRADD                    |                    |      |                     |                      | 104.48      | 64.08% | 3                          | 1  | 2   | 34.37%  |
| SOX2                                    | SOX2                     | TF                 |      |                     |                      |             |        |                            |    |     |         |

| GeneGO Object Name             | Mapped Gene Symbol        | Molecular Function | DEGs | Predicted Targets † | miRNA Subnetwork**   | Betweenness |        | # of Interactions (Degree) |    |     |         |
|--------------------------------|---------------------------|--------------------|------|---------------------|----------------------|-------------|--------|----------------------------|----|-----|---------|
|                                |                           |                    |      |                     |                      | Value       | Rank*  | Total                      | In | Out | Rank*   |
| CDK5                           | CDK5                      |                    |      |                     |                      | 91.42       | 65.31% | 3                          | 1  | 2   | 34.37%  |
| VEGF-B                         | VEGFB                     |                    |      |                     |                      | 90.57       | 65.44% | 3                          | 1  | 2   | 34.37%  |
| MutYH                          | MUTYH                     |                    | ✓    |                     |                      | 90.24       | 65.58% | 4                          | 4  | 0   | 100.00% |
| IBP2                           | IGFBP2                    |                    |      |                     | 199a-3p              | 89.99       | 65.71% | 3                          | 2  | 1   | 52.82%  |
| Clusterin                      | CLU                       |                    |      |                     |                      | 89.49       | 65.85% | 4                          | 3  | 1   | 52.82%  |
| HIP-2                          | UBE2K                     |                    | ✓    |                     |                      | 89.20       | 65.99% | 5                          | 1  | 4   | 18.17%  |
| PAX5                           | PAX5                      | TF                 |      |                     |                      | 88.35       | 66.12% | 5                          | 3  | 2   | 34.37%  |
| CGI-141                        | GOLT1B                    |                    |      |                     |                      | 87.55       | 66.26% | 2                          | 1  | 1   | 52.82%  |
| GHR                            | GHR                       |                    |      |                     |                      | 86.70       | 66.39% | 2                          | 1  | 1   | 52.82%  |
| WNT3A                          | WNT3A                     |                    |      |                     | 199a-3p              | 86.18       | 66.53% | 3                          | 2  | 1   | 52.82%  |
| IBP4                           | IGFBP4                    |                    |      |                     |                      | 85.85       | 66.67% | 3                          | 2  | 1   | 52.82%  |
| LIN-28B                        | LIN28B                    |                    | ✓    | 101, 199-3p         | 199a-3p              | 85.47       | 66.80% | 3                          | 3  | 0   | 100.00% |
| Versican                       | VCAN                      |                    |      |                     | 101, 139-5p, 199a-3p | 84.47       | 66.94% | 4                          | 3  | 1   | 52.82%  |
| ATF-1                          | ATF1                      | TF                 |      |                     | 199a-3p              | 83.55       | 67.07% | 4                          | 1  | 3   | 24.08%  |
| MLK3(MAP3K11)                  | MAP3K11                   |                    |      |                     |                      | 83.54       | 67.21% | 4                          | 2  | 2   | 34.37%  |
| MYF6                           | MYF6                      | TF                 |      |                     | 101, 139-5p          | 82.74       | 67.35% | 4                          | 2  | 2   | 34.37%  |
| Sin3A                          | SIN3A                     |                    |      | 101                 |                      | 81.69       | 67.48% | 4                          | 3  | 1   | 52.82%  |
| CHERP                          | CHERP                     |                    | ✓    |                     |                      | 81.16       | 67.62% | 3                          | 3  | 0   | 100.00% |
| GRO-1                          | CXCL1                     |                    |      |                     |                      | 81.11       | 67.76% | 2                          | 1  | 1   | 52.82%  |
| NEURL1                         | NEURL                     |                    |      |                     | 101, 139-5p, 199a-3p | 80.88       | 67.89% | 3                          | 3  | 0   | 100.00% |
| NEIL1                          | NEIL1                     |                    |      |                     | 101, 139-5p          | 80.17       | 68.03% | 2                          | 1  | 1   | 52.82%  |
| HPK38                          | MELK                      |                    | ✓    |                     |                      | 79.22       | 68.16% | 3                          | 3  | 0   | 100.00% |
| Granzyme A                     | GZMA                      |                    |      |                     |                      | 78.96       | 68.30% | 3                          | 2  | 1   | 52.82%  |
| Ephrin-B receptor 1            | EPHB1                     |                    |      |                     |                      | 78.36       | 68.44% | 2                          | 1  | 1   | 52.82%  |
| Sirtuin7                       | SIRT7                     |                    | ✓    |                     | 101, 139-5p          | 77.26       | 68.57% | 6                          | 5  | 1   | 52.82%  |
| YAP1 (YAp65)                   | YAP1                      |                    |      | 199-3p              | 101, 139-5p, 199a-3p | 74.60       | 68.71% | 3                          | 2  | 1   | 52.82%  |
| CITED2                         | CITED2                    | TF                 |      | 199-3p              | 199a-3p              | 74.32       | 68.84% | 4                          | 2  | 2   | 34.37%  |
| Furin                          | FURIN                     |                    |      |                     |                      | 72.26       | 68.98% | 4                          | 1  | 3   | 24.08%  |
| EGR2 (Krox20)                  | EGR2                      | TF                 |      |                     |                      | 71.04       | 69.12% | 3                          | 2  | 1   | 52.82%  |
| MEK2(MAP2K2)                   | MAP2K2                    |                    |      |                     |                      | 70.57       | 69.25% | 3                          | 2  | 1   | 52.82%  |
| PAR1                           | F2R                       |                    |      |                     |                      | 70.12       | 69.39% | 3                          | 2  | 1   | 52.82%  |
| Calreticulin                   | CALR                      |                    |      |                     |                      | 69.96       | 69.52% | 2                          | 1  | 1   | 52.82%  |
| MEF2C                          | MEF2C                     | TF                 |      |                     |                      | 69.82       | 69.66% | 3                          | 1  | 2   | 34.37%  |
| ECE2                           | ECE2                      |                    | ✓    |                     |                      | 69.04       | 69.80% | 2                          | 1  | 1   | 52.82%  |
| PKC-delta                      | PRKCD                     |                    |      |                     | 101, 139-5p          | 67.94       | 69.93% | 2                          | 1  | 1   | 52.82%  |
| FBXW7                          | FBXW7                     | EPIGENES           |      |                     | 101, 139-5p          | 67.94       | 69.93% | 2                          | 1  | 1   | 52.82%  |
| MTAP                           | MTAP                      |                    | ✓    |                     | 199a-3p              | 67.73       | 70.20% | 4                          | 4  | 0   | 100.00% |
| TAFI28                         | TAF11                     |                    | ✓    |                     | 101, 139-5p          | 67.57       | 70.34% | 4                          | 3  | 1   | 52.82%  |
| LCKBP1                         | HCLS1                     |                    | ✓    |                     | 101, 139-5p          | 65.46       | 70.48% | 3                          | 3  | 0   | 100.00% |
| DITF1                          | DITF1                     | TF                 |      |                     |                      | 63.48       | 70.61% | 4                          | 1  | 3   | 24.08%  |
| PACE4                          | PCSK6                     | TF                 |      |                     | 101, 139-5p          | 63.39       | 70.75% | 2                          | 1  | 1   | 52.82%  |
| UNG1                           | UNG                       |                    | ✓    | 101                 |                      | 59.14       | 70.88% | 3                          | 3  | 0   | 100.00% |
| DOK1                           | DOK1                      |                    |      |                     |                      | 58.71       | 71.02% | 2                          | 1  | 1   | 52.82%  |
| microRNA 106a                  | miR-106a                  |                    |      |                     |                      | 58.30       | 71.16% | 2                          | 1  | 1   | 52.82%  |
| NIPP-1                         | PPP1R8                    |                    |      |                     | 199a-3p              | 57.35       | 71.29% | 3                          | 2  | 1   | 52.82%  |
| USP25                          | USP25                     |                    | ✓    | 199-3p              | 199a-3p              | 57.16       | 71.43% | 5                          | 5  | 0   | 100.00% |
| SIAHBP1                        | PUF60                     |                    |      |                     |                      | 55.51       | 71.56% | 3                          | 2  | 1   | 52.82%  |
| KLF7                           | KLF7                      | TF                 | ✓    |                     |                      | 55.34       | 71.70% | 4                          | 3  | 1   | 52.82%  |
| G-CSF                          | CSF3                      |                    |      |                     | 101, 139-5p, 199a-3p | 54.72       | 71.84% | 3                          | 2  | 1   | 52.82%  |
| SNSR4                          | MRGPRX1                   |                    |      |                     |                      | 54.39       | 71.97% | 3                          | 1  | 2   | 34.37%  |
| IRS-2                          | IRS2                      |                    |      |                     |                      | 54.23       | 72.11% | 3                          | 1  | 2   | 34.37%  |
| FTLHSDC1                       | MTHFD1L                   |                    | ✓    |                     | 199a-3p              | 53.82       | 72.24% | 3                          | 3  | 0   | 100.00% |
| PAK3                           | PAK3                      |                    |      |                     |                      | 53.36       | 72.38% | 2                          | 1  | 1   | 52.82%  |
| DAX1                           | NR0B1                     | TF                 |      |                     | 101, 139-5p          | 51.55       | 72.52% | 5                          | 2  | 3   | 24.08%  |
| DREAM                          | KCNIP3                    |                    |      |                     |                      | 51.51       | 72.65% | 2                          | 1  | 1   | 52.82%  |
| Miz-1                          | ZBTB17                    | TF                 |      |                     |                      | 51.50       | 72.79% | 3                          | 1  | 2   | 34.37%  |
| 14-3-3 sigma                   | SFN                       |                    |      |                     | 101, 139-5p          | 51.48       | 72.93% | 3                          | 2  | 1   | 52.82%  |
| RENT2                          | UPF2                      |                    |      | 199-3p              | 199a-3p              | 50.94       | 73.06% | 2                          | 1  | 1   | 52.82%  |
| BAF53A                         | ACTL6A                    | EPIGENES           | ✓    |                     |                      | 50.79       | 73.20% | 5                          | 4  | 1   | 52.82%  |
| beta-TrCP                      | BTRC                      |                    |      | 199-3p              | 199a-3p              | 50.07       | 73.33% | 3                          | 2  | 1   | 52.82%  |
| IBP3                           | IGFBP3                    |                    |      |                     | 199a-3p              | 49.43       | 73.47% | 3                          | 2  | 1   | 52.82%  |
| PI3K cat class IB (p110-gamma) | PIK3CG                    |                    |      |                     |                      | 48.72       | 73.61% | 3                          | 2  | 1   | 52.82%  |
| URKL1                          | UCKL1                     |                    | ✓    |                     |                      | 48.41       | 73.74% | 2                          | 2  | 0   | 100.00% |
| CHD7                           | CHD7                      | EPIGENES           | ✓    | 139-5p              | 101, 139-5p          | 47.38       | 73.88% | 2                          | 2  | 0   | 100.00% |
| TCP1                           | TCP1                      |                    |      |                     | 101, 139-5p, 199a-3p | 46.98       | 74.01% | 3                          | 2  | 1   | 52.82%  |
| PPP2R2D                        | PPP2R2D                   |                    | ✓    |                     |                      | 46.77       | 74.15% | 2                          | 1  | 1   | 52.82%  |
| FOXC1                          | FOXC1                     | TF                 |      |                     |                      | 46.75       | 74.29% | 2                          | 1  | 1   | 52.82%  |
| Tip60                          | KAT5                      | EPIGENES           |      |                     |                      | 46.48       | 74.42% | 4                          | 1  | 3   | 24.08%  |
| GADD45 beta                    | GADD45B                   |                    |      |                     |                      | 45.98       | 74.56% | 3                          | 1  | 2   | 34.37%  |
| TAF3                           | TAF3                      |                    | ✓    |                     |                      | 45.41       | 74.69% | 3                          | 0  | 3   | 24.08%  |
| SRPK1                          | SRPK1                     |                    | ✓    | 139-5p              | 101, 139-5p          | 45.41       | 74.83% | 2                          | 1  | 1   | 52.82%  |
| PIAS4                          | PIAS4                     |                    |      |                     | 101, 139-5p          | 45.39       | 74.97% | 5                          | 1  | 4   | 18.17%  |
| PELP1                          | PELP1                     |                    |      |                     | 101, 139-5p          | 45.36       | 75.10% | 2                          | 1  | 1   | 52.82%  |
| Hamartin                       | TSC1                      |                    |      |                     | 199a-3p              | 44.81       | 75.24% | 3                          | 2  | 1   | 52.82%  |
| L3MBTL                         | L3MBTL                    | TF                 | ✓    |                     |                      | 44.71       | 75.37% | 3                          | 0  | 3   | 24.08%  |
| Calcineurin A (catalytic)      | Calcineurin A (catalytic) |                    |      |                     |                      | 44.65       | 75.51% | 2                          | 1  | 1   | 52.82%  |
| E7 protein (HPV16)             | E7 protein (HPV16)        |                    |      |                     | 101, 139-5p          | 44.65       | 75.51% | 2                          | 1  | 1   | 52.82%  |
| KNG                            | KNG1                      |                    |      |                     | 101, 139-5p          | 44.65       | 75.51% | 2                          | 1  | 1   | 52.82%  |
| IQGAP1                         | IQGAP1                    |                    |      |                     |                      | 44.00       | 75.92% | 2                          | 1  | 1   | 52.82%  |
| NF-AT3(NFATC4)                 | NFATC4                    | TF                 |      |                     |                      | 44.00       | 75.92% | 2                          | 1  | 1   | 52.82%  |
| STAT2                          | STAT2                     | TF                 |      |                     |                      | 41.53       | 76.19% | 3                          | 2  | 1   | 52.82%  |
| SUPT5H                         | SUPT5H                    |                    |      |                     |                      | 40.96       | 76.33% | 2                          | 1  | 1   | 52.82%  |
| PDGF-R-beta                    | PDGFRB                    |                    |      |                     |                      | 39.76       | 76.46% | 2                          | 1  | 1   | 52.82%  |
| TIWIST1                        | TIWIST1                   |                    |      |                     | 101, 139-5p, 199a-3p | 39.17       | 76.60% | 4                          | 3  | 1   | 52.82%  |
| RASSF1                         | RASSF1                    |                    |      |                     |                      | 38.86       | 76.73% | 4                          | 2  | 2   | 34.37%  |
| NEPHE2                         | KIRREL3                   |                    |      |                     |                      | 38.83       | 76.87% | 2                          | 1  | 1   | 52.82%  |
| TIMP4                          | TIMP4                     |                    |      |                     | 101, 139-5p          | 38.83       | 76.87% | 2                          | 1  | 1   | 52.82%  |
| TIMP2                          | TIMP2                     |                    |      |                     | 101, 139-5p          | 38.83       | 76.87% | 2                          | 1  | 1   | 52.82%  |
| NF-E2 (45 kDa)                 | NFE2                      | TF                 |      |                     |                      | 38.68       | 77.28% | 4                          | 2  | 2   | 34.37%  |
| Casein kinase I alpha          | CSNK1A1                   |                    |      |                     |                      | 37.84       | 77.41% | 2                          | 1  | 1   | 52.82%  |
| PARP-2                         | PARP2                     |                    |      |                     |                      | 36.59       | 77.55% | 2                          | 1  | 1   | 52.82%  |
| IL-5 receptor                  | IL-5 receptor             |                    |      |                     |                      | 35.82       | 77.69% | 2                          | 1  | 1   | 52.82%  |
| Calcitonin                     | CALCA                     |                    |      |                     |                      | 35.06       | 77.82% | 2                          | 1  | 1   | 52.82%  |
| DDX41                          | DDX41                     |                    | ✓    |                     |                      | 34.95       | 77.96% | 2                          | 1  | 1   | 52.82%  |
| GBL                            | MLST8                     |                    |      |                     | 199a-3p              | 34.82       | 78.10% | 2                          | 1  | 1   | 52.82%  |
| GRP78                          | HSPA5                     |                    |      |                     |                      | 34.73       | 78.23% | 2                          | 1  | 1   | 52.82%  |
| Lyn                            | LYN                       |                    |      |                     |                      | 34.46       | 78.37% | 5                          | 1  | 4   | 18.17%  |
| Sirtuin1                       | SIRT1                     | EPIGENES           |      |                     | 199a-3p              | 34.37       | 78.50% | 3                          | 1  | 2   | 34.37%  |
| RAGE                           | AGER                      |                    |      |                     |                      | 34.30       | 78.64% | 2                          | 1  | 1   | 52.82%  |
| MBD1                           | MBD1                      | EPIGENES           |      |                     |                      | 34.02       | 78.78% | 3                          | 2  | 1   | 52.82%  |
| Nucleolin                      | NCL                       |                    |      |                     |                      | 33.80       | 78.91% | 4                          | 1  | 3   | 24.08%  |
| PI3K cat class IA              | PI3K cat class IA         |                    |      |                     |                      | 33.58       | 79.05% | 2                          | 1  | 1   | 52.82%  |
| TRIP6                          | TRIP6                     |                    |      |                     |                      | 33.18       | 79.18% | 2                          | 1  | 1   | 52.82%  |
| Claudin-1                      | CLDN1                     |                    |      |                     |                      | 33.04       | 79.32% | 2                          | 1  | 1   | 52.82%  |
| EZH1                           | EZH1                      | EPIGENES           | ✓    |                     |                      | 32.68       | 79.46% | 4                          | 0  | 4   | 18.17%  |
| VIP receptor 1                 | VIPR1                     |                    |      |                     |                      | 32.28       | 79.59% | 2                          | 1  | 1   | 52.82%  |
| LL37                           | CAMP                      |                    |      |                     | 101, 139-5p          | 31.97       | 79.73% | 4                          | 3  | 1   | 52.82%  |
| CRM1                           | XPO1                      |                    |      |                     |                      | 31.93       | 79.86% | 3                          | 1  | 2   | 34.37%  |
| GMF-gamma                      | GMFG                      |                    | ✓    |                     | 101, 139-5p          | 31.84       | 80.00% | 5                          | 5  | 0   | 100.00% |
| CBF beta                       | CBFB                      | TF                 |      |                     | 101, 139-5p          | 31.16       | 80.14% | 2                          | 1  | 1   | 52.82%  |
| GC1QBP                         | C1QBP                     |                    |      |                     | 101, 139-5p          | 31.16       | 80.14% | 2                          | 1  | 1   | 52.82%  |
| ZFP36(Tristetraprolin)         | ZFP36                     |                    |      |                     |                      | 31.07       | 80.41% | 3                          | 1  | 2   | 34.37%  |
| KLF5                           | KLF5                      | TF                 |      |                     |                      | 30.77       | 80.54% | 3                          | 2  | 1   | 52.82%  |
| ZNF593                         | ZNF593                    |                    | ✓    |                     |                      | 30.75       | 80.68% | 2                          | 2  | 0   | 100.00% |
| Thimet oligopeptidase          | THOP1                     |                    |      |                     |                      | 30.45       | 80.82% | 3                          | 1  | 2   | 34.37%  |
| EGLN1                          | EGLN1                     |                    |      |                     |                      |             |        |                            |    |     |         |

| GeneGO Object Name                       | Mapped Gene Symbol      | Molecular Function | DEGs | Predicted Targets † | miRNA Subnetwork**   | Betweenness |        | # of Interactions (Degree) |    |     |         |
|------------------------------------------|-------------------------|--------------------|------|---------------------|----------------------|-------------|--------|----------------------------|----|-----|---------|
|                                          |                         |                    |      |                     |                      | Value       | Rank*  | Total                      | In | Out | Rank*   |
| Pyk2(FAK2)                               | PTK2B                   |                    |      |                     |                      | 27.06       | 81.63% | 2                          | 1  | 1   | 52.82%  |
| microRNA 222                             | miR-222                 |                    |      |                     | 101, 139-5p          | 27.00       | 81.77% | 2                          | 1  | 1   | 52.82%  |
| microRNA 221                             | miR-221                 |                    |      |                     | 101, 139-5p          | 27.00       | 81.77% | 2                          | 1  | 1   | 52.82%  |
| HDAC4                                    | HDAC4                   | EPIGENES           |      |                     |                      | 26.79       | 82.04% | 3                          | 1  | 2   | 34.37%  |
| LGMR1                                    | MED19                   |                    | ✓    |                     |                      | 26.69       | 82.18% | 2                          | 1  | 1   | 52.82%  |
| ARPC4                                    | ARPC4                   |                    | ✓    |                     | 101, 139-5p          | 26.44       | 82.31% | 3                          | 3  | 0   | 100.00% |
| Talin                                    | Talin                   |                    |      |                     |                      | 26.39       | 82.45% | 2                          | 1  | 1   | 52.82%  |
| IBP6                                     | IGFBP6                  |                    |      |                     |                      | 26.32       | 82.59% | 2                          | 1  | 1   | 52.82%  |
| CTIP1                                    | BCL11A                  |                    |      |                     |                      | 26.30       | 82.72% | 2                          | 1  | 1   | 52.82%  |
| ATF-6 alpha                              | ATF6                    | TF                 |      |                     | 199a-3p              | 25.62       | 82.86% | 3                          | 1  | 2   | 34.37%  |
| ZFPM1 (FOG)                              | ZFPM1                   |                    |      |                     |                      | 25.34       | 82.99% | 2                          | 1  | 1   | 52.82%  |
| METTL7B                                  | METTL7B                 |                    | ✓    |                     |                      | 25.15       | 83.13% | 2                          | 2  | 0   | 100.00% |
| HOXA2                                    | HOXA2                   | TF                 |      |                     |                      | 25.14       | 83.27% | 2                          | 1  | 1   | 52.82%  |
| POU3F2 (BRN2)                            | POU3F2                  | TF                 |      |                     | 101, 139-5p          | 25.09       | 83.40% | 4                          | 3  | 1   | 52.82%  |
| MAP2K5 (MEK5)                            | MAP2K5                  |                    |      |                     |                      | 24.74       | 83.54% | 2                          | 1  | 1   | 52.82%  |
| GLUT4                                    | SLC2A4                  |                    |      |                     |                      | 24.46       | 83.67% | 2                          | 1  | 1   | 52.82%  |
| DRAP1                                    | DRAP1                   | TF                 |      |                     |                      | 24.26       | 83.81% | 3                          | 1  | 2   | 34.37%  |
| Plakoglobin                              | JUP                     |                    |      |                     |                      | 24.06       | 83.95% | 2                          | 1  | 1   | 52.82%  |
| AMPK alpha 2 subunit                     | PRKAA2                  |                    | ✓    |                     |                      | 23.91       | 84.08% | 2                          | 0  | 2   | 34.37%  |
| Collectrin                               | TMEM27                  |                    | ✓    |                     |                      | 23.39       | 84.22% | 2                          | 2  | 0   | 100.00% |
| TRRAP                                    | TRRAP                   |                    |      |                     |                      | 22.95       | 84.35% | 3                          | 1  | 2   | 34.37%  |
| CIBP1                                    | CTBP1                   | TF                 |      |                     |                      | 22.93       | 84.49% | 3                          | 1  | 2   | 34.37%  |
| AUP1                                     | AUP1                    |                    | ✓    |                     |                      | 21.86       | 84.63% | 2                          | 2  | 0   | 100.00% |
| N-cadherin                               | CDH2                    |                    |      |                     |                      | 21.63       | 84.76% | 2                          | 1  | 1   | 52.82%  |
| JAK3                                     | JAK3                    |                    |      |                     |                      | 21.43       | 84.90% | 3                          | 1  | 2   | 34.37%  |
| MLK2(MAP3K10)                            | MAP3K10                 |                    |      |                     |                      | 21.26       | 85.03% | 2                          | 1  | 1   | 52.82%  |
| IL-4R type I                             | IL-4R type I            |                    |      |                     |                      | 21.05       | 85.17% | 2                          | 1  | 1   | 52.82%  |
| PIT1                                     | POU1F1                  | TF                 |      |                     | 101, 139-5p          | 21.01       | 85.31% | 4                          | 3  | 1   | 52.82%  |
| A-FABP                                   | FABP4                   |                    |      |                     | 101, 139-5p          | 20.55       | 85.44% | 3                          | 2  | 1   | 52.82%  |
| CRSP9                                    | MED7                    |                    | ✓    |                     |                      | 20.34       | 85.58% | 2                          | 2  | 0   | 100.00% |
| SR140                                    | SR140                   |                    | ✓    | 199-3p              | 199a-3p              | 20.23       | 85.71% | 2                          | 2  | 0   | 100.00% |
| SOX15                                    | SOX15                   | TF                 |      |                     | 199a-3p              | 20.17       | 85.85% | 3                          | 2  | 1   | 52.82%  |
| IAP                                      | ALPI                    |                    |      |                     |                      | 19.92       | 85.99% | 3                          | 2  | 1   | 52.82%  |
| Prolactin receptor                       | PRLR                    |                    |      |                     |                      | 19.86       | 86.12% | 2                          | 1  | 1   | 52.82%  |
| Caspase-2                                | CASP2                   |                    |      |                     |                      | 19.45       | 86.26% | 2                          | 1  | 1   | 52.82%  |
| HGFA                                     | HGFAC                   | ✓                  |      |                     | 199a-3p              | 19.27       | 86.39% | 2                          | 2  | 0   | 100.00% |
| ALK-2                                    | ACVR1                   |                    |      |                     | 199-3p               | 19.21       | 86.53% | 4                          | 3  | 1   | 52.82%  |
| PDE4B                                    | PDE4B                   |                    |      |                     | 199a-3p              | 18.60       | 86.67% | 2                          | 2  | 0   | 100.00% |
| ALK-1                                    | ACVRL1                  |                    |      |                     |                      | 18.29       | 86.80% | 3                          | 1  | 2   | 34.37%  |
| PAXB                                     | PAXB                    | TF                 |      |                     |                      | 18.10       | 86.94% | 2                          | 1  | 1   | 52.82%  |
| Schwannomin (NF2)                        | NF2                     |                    |      |                     |                      | 18.06       | 87.07% | 2                          | 1  | 1   | 52.82%  |
| PLK1                                     | PLK1                    |                    |      |                     |                      | 18.05       | 87.21% | 2                          | 1  | 1   | 52.82%  |
| CXXC1                                    | CXXC1                   |                    | ✓    |                     |                      | 17.96       | 87.35% | 2                          | 2  | 0   | 100.00% |
| SOCS1                                    | SOCS1                   |                    |      |                     |                      | 17.93       | 87.48% | 2                          | 1  | 1   | 52.82%  |
| FasL(TNFSF6)                             | FASLG                   |                    |      |                     | 101, 139-5p          | 17.87       | 87.62% | 4                          | 3  | 1   | 52.82%  |
| C3G                                      | RAPGEF1                 |                    |      |                     |                      | 16.76       | 87.76% | 2                          | 1  | 1   | 52.82%  |
| p107                                     | RBL1                    |                    |      |                     |                      | 16.55       | 87.89% | 3                          | 1  | 2   | 34.37%  |
| FAT10                                    | UBD                     |                    | ✓    |                     | 101, 139-5p, 199a-3p | 16.31       | 88.03% | 3                          | 3  | 0   | 100.00% |
| CCR1                                     | CCR1                    |                    |      |                     |                      | 16.26       | 88.16% | 2                          | 1  | 1   | 52.82%  |
| Peg10                                    | PEG10                   |                    |      |                     |                      | 16.09       | 88.30% | 2                          | 1  | 1   | 52.82%  |
| Max                                      | MAX                     | TF                 |      |                     |                      | 16.09       | 88.30% | 2                          | 1  | 1   | 52.82%  |
| Leukocyte elastase                       | ELANE                   |                    |      |                     |                      | 15.99       | 88.57% | 2                          | 1  | 1   | 52.82%  |
| Leptin receptor                          | LEPR                    |                    |      |                     |                      | 15.92       | 88.71% | 3                          | 1  | 2   | 34.37%  |
| PNRC2                                    | PNRC2                   |                    |      |                     |                      | 15.87       | 88.84% | 2                          | 1  | 1   | 52.82%  |
| TRAF7                                    | TRAF7                   |                    | ✓    |                     |                      | 15.70       | 88.98% | 3                          | 2  | 1   | 52.82%  |
| AXUD1                                    | CSRN1P                  | TF                 |      |                     | 101, 139-5p          | 15.64       | 89.12% | 3                          | 3  | 0   | 100.00% |
| CILP                                     | CILP                    |                    |      |                     |                      | 15.64       | 89.25% | 2                          | 1  | 1   | 52.82%  |
| CDX2                                     | CDX2                    | TF                 |      |                     |                      | 15.63       | 89.39% | 2                          | 1  | 1   | 52.82%  |
| IL8RB                                    | CXCR2                   |                    |      |                     |                      | 15.03       | 89.52% | 2                          | 1  | 1   | 52.82%  |
| DNMT3B                                   | DNMT3B                  | EPIGENES           |      |                     | 199a-3p              | 14.96       | 89.66% | 4                          | 2  | 2   | 34.37%  |
| MUC1                                     | MUC1                    |                    |      |                     |                      | 14.77       | 89.80% | 2                          | 1  | 1   | 52.82%  |
| MJD (ataxin-3)                           | ATXN3                   |                    |      |                     | 101, 139-5p          | 14.77       | 89.93% | 2                          | 1  | 1   | 52.82%  |
| IRF2                                     | IRF2                    | TF                 |      |                     |                      | 14.73       | 90.07% | 2                          | 1  | 1   | 52.82%  |
| TBX2                                     | TBX2                    | TF                 |      |                     |                      | 14.51       | 90.20% | 2                          | 1  | 1   | 52.82%  |
| ERCC6                                    | ERCC6                   | EPIGENES           |      |                     |                      | 14.22       | 90.34% | 2                          | 1  | 1   | 52.82%  |
| RCD1                                     | RQCD1                   |                    | ✓    |                     |                      | 14.00       | 90.48% | 3                          | 1  | 2   | 34.37%  |
| Calponin-3                               | CNN3                    |                    |      |                     |                      | 13.97       | 90.61% | 2                          | 1  | 1   | 52.82%  |
| HOXC6                                    | HOXC6                   | TF                 |      |                     | 199a-3p              | 13.93       | 90.75% | 2                          | 1  | 1   | 52.82%  |
| ROR2                                     | ROR2                    |                    |      |                     |                      | 13.39       | 90.88% | 2                          | 1  | 1   | 52.82%  |
| Plasmin                                  | Plasmin                 |                    |      |                     |                      | 13.06       | 91.02% | 2                          | 1  | 1   | 52.82%  |
| Caveolin-1                               | CAV1                    |                    |      |                     |                      | 13.06       | 91.02% | 2                          | 1  | 1   | 52.82%  |
| GMF                                      | GMFB                    |                    | ✓    |                     |                      | 12.93       | 91.29% | 2                          | 1  | 1   | 52.82%  |
| IL-9 receptor                            | IL-9 receptor           |                    |      |                     |                      | 12.41       | 91.43% | 2                          | 1  | 1   | 52.82%  |
| DDC                                      | DDC                     |                    |      |                     |                      | 12.33       | 91.56% | 2                          | 1  | 1   | 52.82%  |
| UBE2T                                    | UBE2T                   |                    | ✓    |                     |                      | 12.33       | 91.70% | 2                          | 1  | 1   | 52.82%  |
| Fibrillin 1                              | FBN1                    |                    |      |                     |                      | 12.02       | 91.84% | 2                          | 1  | 1   | 52.82%  |
| GRK2                                     | ADRBK1                  |                    |      |                     |                      | 11.94       | 91.97% | 2                          | 1  | 1   | 52.82%  |
| 40453                                    | POU2F2                  | TF                 |      |                     |                      | 11.76       | 92.11% | 2                          | 1  | 1   | 52.82%  |
| SLIRP                                    | C14orf156               |                    | ✓    |                     |                      | 11.76       | 92.24% | 2                          | 1  | 1   | 52.82%  |
| FLASH                                    | CASP8AP2                |                    |      |                     |                      | 11.72       | 92.38% | 2                          | 1  | 1   | 52.82%  |
| ADAM17                                   | ADAM17                  |                    |      |                     |                      | 11.08       | 92.52% | 2                          | 1  | 1   | 52.82%  |
| A1U                                      | UBQLN4                  |                    |      |                     | 101, 139-5p          | 11.02       | 92.65% | 2                          | 2  | 0   | 100.00% |
| LRP6                                     | LRP6                    |                    |      |                     |                      | 10.95       | 92.79% | 2                          | 1  | 1   | 52.82%  |
| NGF                                      | NGF                     |                    |      |                     |                      | 10.79       | 92.93% | 2                          | 1  | 1   | 52.82%  |
| IFN-alpha/beta receptor                  | IFN-alpha/beta receptor |                    |      |                     |                      | 10.67       | 93.06% | 2                          | 1  | 1   | 52.82%  |
| CLIP170                                  | CLIP1                   |                    |      |                     |                      | 10.62       | 93.20% | 2                          | 1  | 1   | 52.82%  |
| GOLT1A                                   | GOLT1A                  |                    |      |                     |                      | 10.36       | 93.33% | 2                          | 2  | 0   | 100.00% |
| ILK                                      | ILK                     |                    |      |                     |                      | 9.95        | 93.47% | 2                          | 1  | 1   | 52.82%  |
| Smac/Diablo                              | DIABLO                  |                    |      |                     |                      | 9.81        | 93.61% | 2                          | 1  | 1   | 52.82%  |
| HtrA2                                    | HTRA2                   |                    |      |                     |                      | 9.81        | 93.61% | 2                          | 1  | 1   | 52.82%  |
| HSP60                                    | HSPD1                   |                    |      |                     |                      | 9.65        | 93.88% | 2                          | 1  | 1   | 52.82%  |
| Cullin 4A                                | CUL4A                   |                    |      |                     |                      | 9.37        | 94.01% | 2                          | 1  | 1   | 52.82%  |
| Rictor                                   | RICTOR                  |                    |      |                     |                      | 9.30        | 94.15% | 2                          | 1  | 1   | 52.82%  |
| microRNA 214                             | miR-214                 |                    |      |                     | 199a-3p              | 9.16        | 94.29% | 3                          | 2  | 1   | 52.82%  |
| SATB2                                    | SATB2                   | TF                 |      |                     |                      | 9.16        | 94.42% | 2                          | 1  | 1   | 52.82%  |
| TAK1(MAP3K7)                             | MAP3K7                  |                    |      |                     |                      | 9.14        | 94.56% | 3                          | 1  | 2   | 34.37%  |
| PLC-gamma 1                              | PLCG1                   |                    |      |                     |                      | 8.83        | 94.69% | 2                          | 1  | 1   | 52.82%  |
| HCF1                                     | HCFC1                   | TF                 |      |                     |                      | 8.80        | 94.83% | 2                          | 1  | 1   | 52.82%  |
| BMP receptor 2                           | BMPR2                   |                    |      |                     |                      | 8.59        | 94.97% | 3                          | 2  | 1   | 52.82%  |
| TXNIP (VDUP1)                            | TXNIP                   |                    |      |                     |                      | 8.48        | 95.10% | 3                          | 2  | 1   | 52.82%  |
| SP4                                      | SP4                     | TF                 |      |                     |                      | 8.43        | 95.24% | 2                          | 1  | 1   | 52.82%  |
| HES1                                     | HES1                    |                    |      |                     |                      | 8.37        | 95.37% | 2                          | 1  | 1   | 52.82%  |
| LRP130                                   | LRPPRC                  |                    | ✓    |                     |                      | 8.14        | 95.51% | 2                          | 1  | 1   | 52.82%  |
| Twinfilin                                | TWF1                    |                    | ✓    |                     |                      | 7.76        | 95.65% | 2                          | 2  | 0   | 100.00% |
| ACY2                                     | ASPA                    |                    | ✓    |                     |                      | 7.57        | 95.78% | 2                          | 2  | 0   | 100.00% |
| 40457                                    | POU3F1                  | TF                 |      |                     |                      | 7.48        | 95.92% | 2                          | 1  | 1   | 52.82%  |
| IL-10 receptor                           | IL-10 receptor          |                    |      |                     |                      | 7.35        | 96.05% | 2                          | 1  | 1   | 52.82%  |
| WNT11                                    | WNT11                   |                    |      |                     |                      | 6.96        | 96.19% | 2                          | 1  | 1   | 52.82%  |
| PLOD1                                    | PLOD1                   |                    | ✓    |                     |                      | 6.65        | 96.33% | 2                          | 2  | 0   | 100.00% |
| EDF1                                     | EDF1                    | TF                 |      |                     |                      | 6.62        | 96.46% | 2                          | 1  | 1   | 52.82%  |
| SREBP2 precursor                         | SREBF2                  | TF                 |      |                     |                      | 6.62        | 96.46% | 2                          | 1  | 1   | 52.82%  |
| RBMS1                                    | RBMS1                   |                    |      |                     | 199a-3p              | 6.59        | 96.73% | 2                          | 1  | 1   | 52.82%  |
| ETS2                                     | ETS2                    | TF                 |      |                     | 101, 139-5p          | 6.53        | 96.87% | 4                          | 1  | 3   | 24.08%  |
| CRHR1                                    | CRHR1                   |                    |      |                     |                      | 6.29        | 97.01% | 2                          | 1  | 1   | 52.82%  |
| ING1                                     | ING1                    |                    |      |                     |                      | 6.17        | 97.14% | 2                          | 1  | 1   | 52.82%  |
| TRAF6                                    | TRAF6                   |                    |      |                     |                      | 6.15        | 97.28% | 2                          | 1  | 1   | 52.82%  |
| Staf-50                                  | TRIM22                  | TF                 | ✓    |                     | 199a-3p              | 5.71        | 97.41% | 2                          | 1  | 1   | 52.82%  |
| Casein kinase II, alpha' chain (CSNK2A2) | CSNK2A2                 |                    |      |                     |                      | 5.69        | 97.55% | 2                          | 1  | 1   | 52.82%  |
| N-Ras                                    | NRAS                    |                    |      |                     |                      | 5.58        | 97.69% | 2                          | 1  | 1   | 52.82%  |
| K-RAS                                    | KRAS                    |                    |      |                     |                      | 5.58        | 97.69% | 2                          | 1  | 1   | 52.82%  |

| GeneGO Object Name | Mapped Gene Symbol | Molecular Function | DEGs | Predicted Targets † | miRNA Subnetwork** | Betweenness |         | # of Interactions (Degree) |    |     |         |
|--------------------|--------------------|--------------------|------|---------------------|--------------------|-------------|---------|----------------------------|----|-----|---------|
|                    |                    |                    |      |                     |                    | Value       | Rank*   | Total                      | In | Out | Rank*   |
| NFE2L1             | NFE2L1             | TF                 |      |                     |                    | 5.52        | 97.96%  | 2                          | 1  | 1   | 52.82%  |
| Neuroillin-2       | NRP2               |                    |      |                     |                    | 5.26        | 98.10%  | 3                          | 1  | 2   | 34.37%  |
| Tuberlin           | TSC2               |                    |      |                     |                    | 4.95        | 98.23%  | 2                          | 1  | 1   | 52.82%  |
| Cathepsin H        | CTSH               |                    | ✓    |                     |                    | 4.78        | 98.37%  | 3                          | 3  | 0   | 100.00% |
| CDC18L (CDC6)      | CDC6               |                    |      |                     |                    | 4.58        | 98.50%  | 2                          | 1  | 1   | 52.82%  |
| PURB               | PURB               | TF                 | ✓    |                     |                    | 4.28        | 98.64%  | 2                          | 0  | 2   | 34.37%  |
| PKC-zeta           | PRKCZ              |                    |      |                     |                    | 4.22        | 98.78%  | 2                          | 1  | 1   | 52.82%  |
| ATP2C1             | ATP2C1             |                    | ✓    |                     |                    | 3.83        | 98.91%  | 2                          | 2  | 0   | 100.00% |
| Tafazzin           | TAZ                |                    | ✓    |                     |                    | 3.36        | 99.05%  | 2                          | 1  | 1   | 52.82%  |
| SETDB1             | SETDB1             | EPIGENES           |      |                     |                    | 3.06        | 99.18%  | 2                          | 1  | 1   | 52.82%  |
| GP1                | GP1                |                    |      |                     | 199a-3p            | 3.00        | 99.32%  | 2                          | 2  | 0   | 100.00% |
| ZNF57              | ZNF57              |                    | ✓    |                     |                    | 2.97        | 99.46%  | 2                          | 2  | 0   | 100.00% |
| L1CAM              | L1CAM              |                    |      |                     |                    | 2.79        | 99.59%  | 3                          | 1  | 2   | 34.37%  |
| CDC25A             | CDC25A             |                    |      |                     |                    | 1.89        | 99.73%  | 2                          | 1  | 1   | 52.82%  |
| RIG-G              | IFIT3              |                    |      |                     |                    | 1.75        | 99.86%  | 2                          | 1  | 1   | 52.82%  |
| ENY2               | ENY2               |                    | ✓    |                     |                    | 0.00        | 100.00% | 1                          | 1  | 0   | 100.00% |
| SBDS               | SBDS               |                    |      |                     |                    | 0.00        | 100.00% | 1                          | 1  | 0   | 100.00% |
| ZNF133             | ZNF133             | TF                 | ✓    |                     |                    | 0.00        | 100.00% | 1                          | 1  | 0   | 100.00% |
| TH1L               | TH1L               |                    | ✓    |                     |                    | 0.00        | 100.00% | 1                          | 1  | 0   | 100.00% |
| Ms4a6b             | MS4A6A             |                    | ✓    |                     |                    | 0.00        | 100.00% | 1                          | 1  | 0   | 100.00% |
| RNF138             | RNF138             |                    |      |                     |                    | 0.00        | 100.00% | 1                          | 1  | 0   | 100.00% |
| UBE2Q2             | UBE2Q2             |                    | ✓    |                     |                    | 0.00        | 100.00% | 1                          | 1  | 0   | 100.00% |
| COQ3               | COQ3               |                    | ✓    |                     |                    | 0.00        | 100.00% | 1                          | 1  | 0   | 100.00% |
| ABTAP              | ESF1               |                    | ✓    |                     |                    | 0.00        | 100.00% | 1                          | 1  | 0   | 100.00% |
| ZNF131             | ZNF131             | TF                 | ✓    |                     |                    | 0.00        | 100.00% | 1                          | 1  | 0   | 100.00% |
| JRK1               | JRK1               |                    | ✓    |                     |                    | 0.00        | 100.00% | 1                          | 1  | 0   | 52.82%  |
| C20orf104          | PHF20              |                    | ✓    |                     |                    | 0.00        | 100.00% | 1                          | 1  | 0   | 100.00% |
| TGF-beta 3         | TGFB3              |                    |      |                     |                    | 0.00        | 100.00% | 2                          | 1  | 1   | 52.82%  |
| YME1L1             | YME1L1             |                    | ✓    |                     |                    | 0.00        | 100.00% | 1                          | 0  | 1   | 52.82%  |
| CDK6               | CDK6               |                    |      |                     |                    | 0.00        | 100.00% | 1                          | 1  | 0   | 100.00% |
| TGM2               | TGM2               |                    |      |                     |                    | 0.00        | 100.00% | 1                          | 0  | 1   | 52.82%  |
| p130CAS            | BCAR1              |                    |      |                     |                    | 0.00        | 100.00% | 2                          | 1  | 1   | 52.82%  |
| GLK(MAP4K3)        | MAP4K3             |                    |      |                     |                    | 0.00        | 100.00% | 2                          | 0  | 2   | 34.37%  |
| GCKR(MAP4K5)       | MAP4K5             |                    |      |                     |                    | 0.00        | 100.00% | 1                          | 1  | 0   | 100.00% |
| TCL1A              | TCL1A              |                    |      |                     |                    | 0.00        | 100.00% | 1                          | 1  | 0   | 100.00% |
| CD43               | SPN                |                    |      |                     |                    | 0.00        | 100.00% | 1                          | 0  | 1   | 52.82%  |
| Elk-4              | ELK4               | TF                 |      |                     |                    | 0.00        | 100.00% | 1                          | 0  | 1   | 52.82%  |
| SOCS3              | SOCS3              |                    |      |                     |                    | 0.00        | 100.00% | 2                          | 1  | 1   | 52.82%  |
| MEF2A              | MEF2A              | TF                 |      |                     |                    | 0.00        | 100.00% | 2                          | 1  | 1   | 52.82%  |
| HAND2              | HAND2              | TF                 |      |                     |                    | 0.00        | 100.00% | 1                          | 0  | 1   | 52.82%  |
| ELF2               | ELF2               | TF                 | ✓    |                     |                    | 0.00        | 100.00% | 1                          | 1  | 0   | 100.00% |
| TARDBP (TDP43)     | TARDBP             | TF                 | ✓    |                     |                    | 0.00        | 100.00% | 1                          | 1  | 0   | 100.00% |
| SC1                | TCF19              | TF                 | ✓    |                     |                    | 0.00        | 100.00% | 1                          | 1  | 0   | 100.00% |
| GAS41              | YEATS4             | TF                 | ✓    |                     |                    | 0.00        | 100.00% | 1                          | 1  | 0   | 100.00% |
| VGLL4              | VGLL4              |                    | ✓    |                     |                    | 0.00        | 100.00% | 1                          | 1  | 0   | 100.00% |
| PMS2L1             | PMS2L1             |                    |      |                     |                    | 0.00        | 100.00% | 1                          | 0  | 1   | 52.82%  |
| P3H1               | LEPRE1             |                    | ✓    |                     |                    | 0.00        | 100.00% | 2                          | 1  | 1   | 52.82%  |
| ACY3               | ACY3               |                    | ✓    |                     |                    | 0.00        | 100.00% | 1                          | 0  | 1   | 52.82%  |
| PRMT3              | PRMT3              |                    | ✓    |                     |                    | 0.00        | 100.00% | 2                          | 1  | 1   | 52.82%  |
| PMS2L8             | PMS2L1             |                    | ✓    |                     |                    | 0.00        | 100.00% | 1                          | 1  | 0   | 100.00% |
| ZBTB40             | ZBTB40             |                    | ✓    |                     |                    | 0.00        | 100.00% | 1                          | 1  | 0   | 100.00% |
| Ciao 1             | CIAO1              |                    | ✓    |                     |                    | 0.00        | 100.00% | 1                          | 1  | 0   | 100.00% |
| C16orf35           | C16orf35           |                    | ✓    |                     |                    | 0.00        | 100.00% | 1                          | 1  | 0   | 100.00% |
| AKNA               | AKNA               |                    | ✓    |                     |                    | 0.00        | 100.00% | 1                          | 1  | 0   | 100.00% |
| FAHD2A             | FAHD2A             |                    | ✓    |                     |                    | 0.00        | 100.00% | 1                          | 1  | 1   | 52.82%  |
| ZNF101             | ZNF101             |                    | ✓    |                     |                    | 0.00        | 100.00% | 1                          | 1  | 0   | 100.00% |
| SAE2               | UBA2               |                    | ✓    |                     |                    | 0.00        | 100.00% | 1                          | 0  | 1   | 52.82%  |
| CNOT4              | CNOT4              |                    | ✓    |                     |                    | 0.00        | 100.00% | 1                          | 1  | 0   | 100.00% |
| ZFP95              | ZKSCAN5            | TF                 | ✓    |                     |                    | 0.00        | 100.00% | 1                          | 0  | 1   | 52.82%  |
| WBSCR22            | WBSCR22            |                    | ✓    |                     |                    | 0.00        | 100.00% | 1                          | 1  | 0   | 100.00% |
| SARA               | ZFYVE9             |                    | ✓    |                     |                    | 0.00        | 100.00% | 1                          | 1  | 0   | 100.00% |
| HELLS (Lsh)        | HELLS              | EPIGENES           | ✓    |                     |                    | 0.00        | 100.00% | 1                          | 1  | 0   | 100.00% |
| DAB2               | DAB2               |                    |      |                     |                    | 0.00        | 100.00% | 1                          | 1  | 0   | 100.00% |
| TRAP100            | MED24              |                    | ✓    |                     |                    | 0.00        | 100.00% | 1                          | 1  | 0   | 100.00% |
| SURF5              | MED22              |                    | ✓    |                     |                    | 0.00        | 100.00% | 2                          | 1  | 1   | 52.82%  |
| RagC               | RRAGC              |                    | ✓    |                     |                    | 0.00        | 100.00% | 2                          | 1  | 1   | 52.82%  |
| AMYP               | AMY2A              |                    |      |                     |                    | 0.00        | 100.00% | 1                          | 1  | 0   | 100.00% |
| USP48              | USP48              |                    | ✓    |                     |                    | 0.00        | 100.00% | 1                          | 1  | 0   | 100.00% |
| PDK1L              | PDK1L              |                    | ✓    |                     |                    | 0.00        | 100.00% | 1                          | 1  | 0   | 100.00% |
| RNA5EH2A           | RNA5EH2A           |                    | ✓    |                     |                    | 0.00        | 100.00% | 1                          | 1  | 0   | 100.00% |
| CHD6               | CHD6               | EPIGENES           | ✓    |                     | 101                | 0.00        | 100.00% | 1                          | 1  | 0   | 100.00% |
| RAD54B             | RAD54B             | EPIGENES           | ✓    |                     |                    | 0.00        | 100.00% | 1                          | 0  | 1   | 52.82%  |
| PRIM1              | PRIM1              |                    | ✓    |                     |                    | 0.00        | 100.00% | 1                          | 1  | 0   | 100.00% |
| Fbxo3              | FBXO3              |                    | ✓    |                     |                    | 0.00        | 100.00% | 1                          | 1  | 0   | 100.00% |
| ZNF764             | ZNF764             |                    | ✓    |                     |                    | 0.00        | 100.00% | 1                          | 1  | 0   | 100.00% |
| Pirin              | PIR                |                    | ✓    |                     |                    | 0.00        | 100.00% | 2                          | 1  | 1   | 52.82%  |
| ZNF33A             | ZNF33A             | TF                 | ✓    |                     | 101                | 0.00        | 100.00% | 2                          | 1  | 1   | 52.82%  |
| ZNF96              | ZSCAN12            | TF                 | ✓    |                     |                    | 0.00        | 100.00% | 4                          | 2  | 2   | 34.37%  |
| SULF2              | SULF2              |                    | ✓    |                     |                    | 0.00        | 100.00% | 2                          | 1  | 1   | 52.82%  |
| C/EBP zeta         | DDIT3              | TF                 | ✓    |                     |                    | 0.00        | 100.00% | 2                          | 1  | 1   | 52.82%  |
| USP31              | USP31              |                    | ✓    |                     |                    | 0.00        | 100.00% | 2                          | 1  | 1   | 52.82%  |
| GFER               | GFER               |                    | ✓    |                     |                    | 0.00        | 100.00% | 2                          | 1  | 1   | 52.82%  |
| GSK3 alpha         | GSK3A              |                    | ✓    |                     |                    | 0.00        | 100.00% | 2                          | 1  | 1   | 52.82%  |
| ADNP               | ADNP               | TF                 | ✓    |                     |                    | 0.00        | 100.00% | 2                          | 1  | 1   | 52.82%  |
| h202a              | h202a              |                    | ✓    |                     |                    | 0.00        | 100.00% | 2                          | 1  | 1   | 52.82%  |
| microRNA 206       | miR-206            |                    | ✓    |                     |                    | 0.00        | 100.00% | 2                          | 1  | 1   | 52.82%  |
| Thioredoxin        | TXN                |                    | ✓    |                     |                    | 0.00        | 100.00% | 2                          | 1  | 1   | 52.82%  |
| ZNF160             | ZNF160             |                    | ✓    |                     | 139-5p             | 0.00        | 100.00% | 2                          | 1  | 1   | 52.82%  |
| S100A7             | S100A7             |                    | ✓    |                     |                    | 0.00        | 100.00% | 2                          | 1  | 1   | 52.82%  |
| Pinin              | PNN                |                    | ✓    |                     | 139-5p             | 0.00        | 100.00% | 1                          | 1  | 0   | 100.00% |
| MED8               | MED8               |                    | ✓    |                     | 139-5p             | 0.00        | 100.00% | 1                          | 1  | 0   | 100.00% |
| ODP2               | DLAT               |                    | ✓    |                     |                    | 0.00        | 100.00% | 2                          | 2  | 0   | 100.00% |

\* Rank percentile

\*\* The components in specific miRNA-subnetworks

† Predicted by TargetScan and context score < -0.2

Supplementary table S7. Topological properties of miR-101 sub-network for cluster C6 network

| GeneGO Object Name                  | Mapped Gene Symbol                  | Molecular Function | DEGs | Predicted Targets † | Betweenness |        | # of Interactions (Degree) |    |     |        |
|-------------------------------------|-------------------------------------|--------------------|------|---------------------|-------------|--------|----------------------------|----|-----|--------|
|                                     |                                     |                    |      |                     | Value       | Rank*  | Total                      | In | Out | Rank*  |
| AP-1                                | FOS                                 | TF                 |      | 101, 139-5p, 199-3p | 88207.05    | 0.78%  | 190                        | 11 | 179 | 0.72%  |
| miR-101                             | miR-101                             |                    |      |                     | 74861.48    | 1.56%  | 77                         | 4  | 73  | 1.44%  |
| EZH2                                | EZH2                                | EPIGENES           | ✓    | 101                 | 16024.90    | 2.34%  | 42                         | 2  | 40  | 2.16%  |
| JAK2                                | JAK2                                |                    |      | 101                 | 9490.86     | 3.13%  | 17                         | 2  | 15  | 3.60%  |
| NF-kB                               | RELA                                | TF                 |      |                     | 8920.23     | 3.91%  | 28                         | 2  | 26  | 2.88%  |
| ZNF143                              | ZNF143                              | TF                 | ✓    | 101                 | 6005.86     | 4.69%  | 12                         | 2  | 10  | 5.04%  |
| SUMO-3                              | SUMO3                               |                    | ✓    | 101, 199-3p         | 5966.60     | 5.47%  | 17                         | 1  | 16  | 3.60%  |
| Caspase-3                           | CASP3                               |                    |      | 101, 139-5p         | 5910.47     | 6.25%  | 10                         | 1  | 9   | 7.91%  |
| mTOR                                | MTOR                                |                    | ✓    |                     | 4266.82     | 7.03%  | 11                         | 1  | 10  | 6.47%  |
| Fibronectin                         | FN1                                 |                    |      | 101, 199-3p         | 3780.00     | 7.81%  | 7                          | 2  | 5   | 13.67% |
| TAZ                                 | WWTR1                               |                    |      | 101                 | 3126.90     | 8.59%  | 11                         | 2  | 9   | 6.47%  |
| PC4                                 | SUB1                                |                    | ✓    | 101                 | 3067.21     | 9.38%  | 6                          | 1  | 5   | 15.83% |
| EED                                 | EED                                 | EPIGENES           | ✓    | 101                 | 3004.33     | 10.16% | 12                         | 2  | 10  | 5.04%  |
| AML1 (RUNX1)                        | RUNX1                               | TF                 |      | 101, 139-5p, 199-3p | 2706.87     | 10.94% | 9                          | 2  | 7   | 10.07% |
| NLK                                 | NLK                                 |                    | ✓    | 101, 199-3p         | 2395.73     | 11.72% | 7                          | 1  | 6   | 13.67% |
| BRG1 (SMARCA4)                      | SMARCA4                             | EPIGENES           |      | 101                 | 2375.62     | 12.50% | 10                         | 1  | 9   | 7.91%  |
| ASK1 (MAP3K5)                       | MAP3K5                              |                    |      | 101, 139-5p, 199-3p | 2357.77     | 13.28% | 5                          | 1  | 4   | 19.42% |
| c-Myb                               | MYB                                 |                    |      | 101                 | 2133.98     | 14.06% | 10                         | 4  | 6   | 7.91%  |
| BAF250A (ARID1A)                    | ARID1A                              | EPIGENES           | ✓    | 101                 | 2037.98     | 14.84% | 8                          | 1  | 7   | 12.23% |
| STAT3                               | STAT3                               | TF                 |      |                     | 1925.07     | 15.63% | 4                          | 4  | 0   | 25.90% |
| p53                                 | TP53                                | TF                 |      |                     | 1787.75     | 16.41% | 6                          | 6  | 0   | 15.83% |
| TGF-beta receptor type I            | TGFBR1                              |                    |      | 101                 | 1759.01     | 17.19% | 5                          | 1  | 4   | 19.42% |
| Aggrecanase-2                       | ADAMTS5                             |                    | ✓    | 101                 | 1635.72     | 17.97% | 5                          | 1  | 4   | 19.42% |
| Rac1                                | RAC1                                |                    |      | 101                 | 1629.72     | 18.75% | 4                          | 1  | 3   | 25.90% |
| Galpha(s)-specific calcitonin GPCRs | Galpha(s)-specific calcitonin GPCRs |                    |      |                     | 1518.00     | 19.53% | 4                          | 1  | 3   | 25.90% |
| Neuropilin-1                        | NRP1                                |                    |      | 101                 | 1518.00     | 19.53% | 4                          | 2  | 2   | 25.90% |
| RIPK1                               | RIPK1                               |                    |      | 101                 | 1518.00     | 19.53% | 3                          | 1  | 2   | 38.13% |
| RAP-1A                              | RAP1A                               |                    |      | 101                 | 1518.00     | 19.53% | 3                          | 1  | 2   | 38.13% |
| G-protein beta/gamma                | G-protein beta/gamma                |                    |      |                     | 1518.00     | 19.53% | 4                          | 2  | 2   | 25.90% |
| N-Myc                               | MYCN                                | TF                 |      | 101                 | 1300.43     | 23.44% | 9                          | 1  | 8   | 10.07% |
| TIF1-alpha                          | TRIM24                              | EPIGENES           | ✓    | 101, 139-5p         | 1294.57     | 24.22% | 7                          | 1  | 6   | 13.67% |
| STAT4                               | STAT4                               | TF                 |      |                     | 1290.21     | 25.00% | 2                          | 2  | 0   | 62.59% |
| RNA polymerase II                   | RNA polymerase II                   |                    |      |                     | 1162.64     | 25.78% | 4                          | 1  | 3   | 25.90% |
| MRK                                 | ICK                                 |                    | ✓    | 101, 139-5p         | 1128.87     | 26.56% | 3                          | 1  | 2   | 38.13% |
| Tcf(Lef)                            | LEF1                                | TF                 |      |                     | 1107.00     | 27.34% | 5                          | 5  | 0   | 19.42% |
| C/EBPalpha                          | CEBPA                               | TF                 |      | 101                 | 1061.86     | 28.13% | 9                          | 2  | 7   | 10.07% |
| c-Myc                               | MYC                                 | TF                 |      |                     | 1052.22     | 28.91% | 5                          | 5  | 0   | 19.42% |
| JDP2                                | JDP2                                | TF                 | ✓    | 101                 | 1016.74     | 29.69% | 8                          | 2  | 6   | 12.23% |
| DNMT3A                              | DNMT3A                              | EPIGENES           |      | 101, 199-3p         | 900.93      | 30.47% | 6                          | 3  | 3   | 15.83% |
| CTCF                                | CTCF                                | TF                 |      | 101                 | 878.63      | 31.25% | 4                          | 2  | 2   | 25.90% |
| TFIIe, alpha subunit                | GTF2E1                              |                    | ✓    | 101                 | 799.21      | 32.03% | 4                          | 2  | 2   | 25.90% |
| GABP alpha                          | GABPA                               | TF                 |      |                     | 775.13      | 32.81% | 2                          | 2  | 0   | 62.59% |
| PACAP                               | ADCYAP1                             |                    |      | 101                 | 760.00      | 33.59% | 4                          | 2  | 2   | 25.90% |
| ENA-78                              | ENA-78                              |                    |      |                     | 760.00      | 33.59% | 2                          | 1  | 1   | 62.59% |
| Amyloid beta                        | Amyloid beta                        |                    |      |                     | 760.00      | 33.59% | 2                          | 1  | 1   | 62.59% |
| NOTCH1 (NICD)                       | NOTCH1 (NICD)                       |                    |      |                     | 760.00      | 33.59% | 2                          | 1  | 1   | 62.59% |
| MSX1                                | MSX1                                | TF                 |      | 101                 | 760.00      | 33.59% | 3                          | 2  | 1   | 38.13% |
| GFRalpha1                           | GFR1                                |                    |      | 101                 | 760.00      | 33.59% | 2                          | 1  | 1   | 62.59% |
| DR1                                 | DR1                                 |                    | ✓    | 101                 | 760.00      | 33.59% | 2                          | 1  | 1   | 62.59% |
| IL-13                               | IL13                                |                    |      | 101                 | 760.00      | 33.59% | 3                          | 2  | 1   | 38.13% |
| Galpha(q)-specific frizzled GPCRs   | Galpha(q)-specific frizzled GPCRs   |                    |      |                     | 760.00      | 33.59% | 2                          | 1  | 1   | 62.59% |
| IL-1RI                              | IL1R1                               |                    |      | 101                 | 760.00      | 33.59% | 2                          | 1  | 1   | 62.59% |
| Ataxin-1                            | ATXN1                               |                    |      | 101, 139-5p         | 760.00      | 33.59% | 2                          | 1  | 1   | 62.59% |
| CYLD                                | CYLD                                |                    |      | 101                 | 760.00      | 33.59% | 2                          | 1  | 1   | 62.59% |
| IL-12 receptor                      | IL-12 receptor                      |                    |      |                     | 760.00      | 33.59% | 3                          | 1  | 2   | 38.13% |
| Importin (karyopherin)-beta         | Importin (karyopherin)-beta         |                    |      |                     | 760.00      | 33.59% | 2                          | 1  | 1   | 62.59% |
| ESR1 (nuclear)                      | ESR1                                | TF                 |      |                     | 692.76      | 44.53% | 4                          | 4  | 0   | 25.90% |
| Beta-catenin                        | CTNNB1                              | TF                 |      |                     | 670.47      | 45.31% | 4                          | 4  | 0   | 25.90% |
| C/EBPdelta                          | CEBPD                               | TF                 | ✓    |                     | 652.40      | 46.09% | 5                          | 5  | 0   | 19.42% |
| p130                                | RBL2                                |                    |      | 101                 | 564.79      | 46.88% | 5                          | 2  | 3   | 19.42% |
| IL-4                                | IL4                                 |                    |      |                     | 556.57      | 47.66% | 3                          | 3  | 0   | 38.13% |
| DNMT1                               | DNMT1                               | EPIGENES           |      |                     | 556.57      | 47.66% | 3                          | 3  | 0   | 38.13% |
| Endoglin                            | ENG                                 |                    | ✓    |                     | 480.13      | 49.22% | 3                          | 3  | 0   | 38.13% |
| RAR-alpha/RXR-alpha                 | RAR-alpha/RXR-alpha                 | TF                 |      |                     | 468.96      | 50.00% | 4                          | 4  | 0   | 25.90% |
| AKT(PKB)                            | AKT(PKB)                            |                    |      |                     | 466.74      | 50.78% | 2                          | 2  | 0   | 62.59% |
| Androgen receptor                   | AR                                  | TF                 |      |                     | 453.59      | 51.56% | 5                          | 5  | 0   | 19.42% |
| Versican                            | VCAN                                |                    |      |                     | 422.01      | 52.34% | 2                          | 2  | 0   | 62.59% |
| JNK(MAPK8-10)                       | JNK(MAPK8-10)                       |                    |      |                     | 422.01      | 52.34% | 2                          | 2  | 0   | 62.59% |
| PAX3                                | PAX3                                | TF                 |      |                     | 418.36      | 53.91% | 3                          | 3  | 0   | 38.13% |
| Progesterone receptor               | PGR                                 | TF                 |      |                     | 340.08      | 56.25% | 3                          | 3  | 0   | 38.13% |
| IGF-1                               | IGF-1                               |                    |      |                     | 392.12      | 55.47% | 5                          | 5  | 0   | 19.42% |
| Cyclin D1                           | CCND1                               |                    |      |                     | 340.08      | 56.25% | 3                          | 3  | 0   | 38.13% |
| CIIA                                | CIIA                                | EPIGENES           |      |                     | 317.61      | 57.81% | 2                          | 2  | 0   | 62.59% |
| NRF2                                | NFE2L2                              | TF                 |      | 101                 | 313.76      | 62.50% | 6                          | 2  | 4   | 15.83% |
| SNAIL1                              | SNAI1                               |                    |      |                     | 317.61      | 57.81% | 2                          | 2  | 0   | 62.59% |
| 14-3-3 sigma                        | SFN                                 |                    |      |                     | 317.61      | 57.81% | 2                          | 2  | 0   | 62.59% |
| TNF-alpha                           | TNF                                 |                    |      |                     | 317.61      | 57.81% | 2                          | 2  | 0   | 62.59% |
| WNT5A                               | WNT5A                               |                    |      |                     | 317.61      | 57.81% | 2                          | 2  | 0   | 62.59% |
| PTEN                                | PTEN                                |                    |      | 139-5p              | 317.61      | 57.81% | 2                          | 2  | 0   | 62.59% |
| ERM                                 | ETV5                                | TF                 |      | 101                 | 269.40      | 63.28% | 4                          | 3  | 1   | 25.90% |
| Oct-3/4                             | POU5F1                              | TF                 |      |                     | 215.30      | 64.84% | 2                          | 2  | 0   | 62.59% |
| Cathepsin L                         | Cathepsin L                         |                    |      |                     | 215.39      | 64.06% | 4                          | 4  | 0   | 25.90% |
| YY1                                 | YY1                                 | TF                 |      |                     | 212.76      | 65.63% | 3                          | 2  | 1   | 38.13% |
| RUNX2                               | RUNX2                               | TF                 |      |                     | 207.55      | 66.41% | 2                          | 2  | 0   | 62.59% |
| SMAD7                               | SMAD7                               | TF                 |      |                     | 207.55      | 66.41% | 2                          | 2  | 0   | 62.59% |
| Eomesodermin                        | EOMES                               | TF                 | ✓    |                     | 153.21      | 72.66% | 3                          | 3  | 0   | 38.13% |
| TMF1                                | TMF1                                |                    | ✓    | 101, 139-5p         | 195.12      | 67.97% | 4                          | 1  | 3   | 25.90% |
| TGT                                 | USP14                               |                    | ✓    | 101                 | 192.84      | 68.75% | 2                          | 1  | 1   | 62.59% |
| ZNRF2                               | ZNRF2                               |                    | ✓    | 101, 199-3p         | 192.84      | 68.75% | 2                          | 1  | 1   | 62.59% |
| PCY2                                | PCYT2                               |                    | ✓    |                     | 187.14      | 70.31% | 3                          | 3  | 0   | 38.13% |
| Thrombospondin 1                    | THBS1                               |                    |      | 139-5p              | 173.08      | 71.09% | 2                          | 2  | 0   | 62.59% |
| CDK1 (p34)                          | CDK1                                |                    |      |                     | 173.08      | 71.09% | 2                          | 2  | 0   | 62.59% |
| SOX9                                | SOX9                                | TF                 |      | 101                 | 100.79      | 76.56% | 3                          | 1  | 2   | 38.13% |
| p27KIP1                             | CDKN1B                              |                    |      |                     | 140.67      | 73.44% | 2                          | 2  | 0   | 62.59% |
| SMAD3                               | SMAD3                               | TF                 |      |                     | 77.14       | 77.34% | 3                          | 3  | 0   | 38.13% |
| QKI                                 | QKI                                 |                    | ✓    | 101, 199-3p         | 113.06      | 75.00% | 2                          | 1  | 1   | 62.59% |
| Sin3A                               | SIN3A                               |                    |      | 101                 | 105.91      | 75.78% | 3                          | 2  | 1   | 38.13% |
| ZNF217                              | ZNF217                              | TF                 |      | 101, 199-3p         | 73.88       | 78.13% | 2                          | 1  | 1   | 62.59% |
| MAFG                                | MAFG                                | TF                 | ✓    |                     | 64.85       | 79.69% | 3                          | 3  | 0   | 38.13% |
| STAT1                               | STAT1                               | TF                 |      |                     | 63.69       | 82.03% | 2                          | 2  | 0   | 62.59% |
| PNRC1                               | PNRC1                               |                    | ✓    | 101, 199-3p         | 67.76       | 78.91% | 3                          | 2  | 1   | 38.13% |
| SSAT                                | SAT1                                |                    | ✓    |                     | 64.85       | 79.69% | 3                          | 3  | 0   | 38.13% |
| Sequestosome 1(p62)                 | SQSTM1                              |                    | ✓    |                     | 64.85       | 79.69% | 3                          | 3  | 0   | 38.13% |
| ATF-3                               | ATF3                                | TF                 | ✓    |                     | 61.43       | 83.59% | 3                          | 3  | 0   | 38.13% |
| MITF                                | MITF                                | TF                 |      | 101                 | 45.71       | 86.72% | 4                          | 3  | 1   | 25.90% |
| EWS/FLI1 fusion protein             | EWS/FLI1 fusion protein             |                    |      |                     | 61.97       | 82.81% | 2                          | 2  | 0   | 62.59% |
| DNMT3B                              | DNMT3B                              | EPIGENES           |      |                     | 26.20       | 89.84% | 2                          | 2  | 0   | 62.59% |

| GeneGO Object Name             | Mapped Gene Symbol   | Molecular Function | DEGs | Predicted Targets † | Betweenness |         | # of Interactions (Degree) |    |     |         |
|--------------------------------|----------------------|--------------------|------|---------------------|-------------|---------|----------------------------|----|-----|---------|
|                                |                      |                    |      |                     | Value       | Rank*   | Total                      | In | Out | Rank*   |
| IBP5                           | IGFBP5               |                    |      | 101, 139-5p         | 50.63       | 84.38%  | 2                          | 1  | 1   | 62.59%  |
| PSF                            | SFPQ                 |                    |      | 101                 | 50.63       | 84.38%  | 2                          | 1  | 1   | 62.59%  |
| ZNF451                         | ZNF451               |                    | ✓    | 101                 | 48.63       | 85.94%  | 2                          | 1  | 1   | 62.59%  |
| TITF1                          | NKX2-1               | TF                 |      |                     | 19.92       | 92.19%  | 3                          | 3  | 0   | 38.13%  |
| MCM2                           | MCM2                 |                    | ✓    |                     | 41.30       | 87.50%  | 4                          | 4  | 0   | 25.90%  |
| MCM5                           | MCM5                 |                    | ✓    |                     | 33.79       | 88.28%  | 3                          | 3  | 0   | 38.13%  |
| MCM3                           | MCM3                 |                    | ✓    |                     | 32.66       | 89.06%  | 2                          | 2  | 0   | 62.59%  |
| NIPP-1                         | PPP1R8               |                    |      |                     | 26.20       | 89.84%  | 2                          | 2  | 0   | 62.59%  |
| EGR1                           | EGR1                 | TF                 | ✓    |                     | 13.06       | 93.75%  | 3                          | 3  | 0   | 38.13%  |
| CSF1                           | CSF1                 |                    |      |                     | 24.47       | 91.41%  | 2                          | 2  | 0   | 62.59%  |
| KLF4                           | KLF4                 | TF                 | ✓    |                     | 5.52        | 95.31%  | 3                          | 3  | 0   | 38.13%  |
| BAT3                           | BAT3                 |                    | ✓    |                     | 17.33       | 92.97%  | 2                          | 2  | 0   | 62.59%  |
| KLF6                           | KLF6                 | TF                 | ✓    |                     | 4.75        | 96.09%  | 3                          | 3  | 0   | 38.13%  |
| Ubiquitin                      | UBB                  |                    |      |                     | 7.04        | 94.53%  | 3                          | 3  | 0   | 38.13%  |
| BMI-1                          | BMI1                 | EPIGENES           | ✓    |                     | 2.33        | 99.22%  | 2                          | 2  | 0   | 62.59%  |
| ADNP                           | ADNP                 | TF                 | ✓    |                     | 0.00        | 100.00% | 1                          | 1  | 0   | 100.00% |
| M-CSF receptor                 | CSF1R                |                    | ✓    |                     | 2.69        | 96.88%  | 3                          | 3  | 0   | 38.13%  |
| Sirtuin7                       | SIRT7                |                    | ✓    |                     | 2.69        | 96.88%  | 2                          | 2  | 0   | 62.59%  |
| MCM4/6/7 complex               | MCM4/6/7 complex     |                    |      |                     | 2.43        | 98.44%  | 3                          | 3  | 0   | 38.13%  |
| AHR                            | AHR                  | TF                 |      |                     | 0.00        | 100.00% | 1                          | 1  | 0   | 100.00% |
| FGL2                           | FGL2                 |                    | ✓    | 199-3p              | 0.00        | 100.00% | 1                          | 1  | 0   | 100.00% |
| Pyk2(FAK2)                     | PTK2B                |                    |      |                     | 0.00        | 100.00% | 1                          | 1  | 0   | 100.00% |
| POLA1                          | POLA1                |                    | ✓    |                     | 0.00        | 100.00% | 1                          | 1  | 0   | 100.00% |
| Cathepsin V                    | CTSL1                |                    | ✓    |                     | 0.00        | 100.00% | 1                          | 1  | 0   | 100.00% |
| GSTM1                          | GSTM1                |                    |      |                     | 0.00        | 100.00% | 1                          | 1  | 0   | 100.00% |
| RET                            | RET                  |                    |      |                     | 0.00        | 100.00% | 1                          | 1  | 0   | 100.00% |
| Bcl-2                          | BCL2                 |                    |      | 139-5p              | 0.00        | 100.00% | 1                          | 1  | 0   | 100.00% |
| USP25                          | USP25                |                    | ✓    | 199-3p              | 0.00        | 100.00% | 1                          | 1  | 0   | 100.00% |
| AP-2A                          | TFAP2A               | TF                 |      |                     | 0.00        | 100.00% | 1                          | 1  | 0   | 100.00% |
| CDK5                           | CDK5                 |                    |      |                     | 0.00        | 100.00% | 1                          | 1  | 0   | 100.00% |
| AXUD1                          | CSRNP1               | TF                 | ✓    |                     | 0.00        | 100.00% | 1                          | 1  | 0   | 100.00% |
| PAK3                           | PAK3                 |                    |      |                     | 0.00        | 100.00% | 1                          | 1  | 0   | 100.00% |
| ErbB2                          | ERBB2                |                    |      |                     | 0.00        | 100.00% | 1                          | 1  | 0   | 100.00% |
| BMAL1                          | ARNTL                | TF                 |      |                     | 0.00        | 100.00% | 2                          | 2  | 0   | 62.59%  |
| TGF-beta receptor type II      | TGFB2                |                    |      |                     | 0.00        | 100.00% | 1                          | 1  | 0   | 100.00% |
| TIMP4                          | TIMP4                |                    |      |                     | 0.00        | 100.00% | 1                          | 1  | 0   | 100.00% |
| FasL(TNFSF6)                   | FASLG                |                    |      |                     | 0.00        | 100.00% | 1                          | 1  | 0   | 100.00% |
| C/EBP zeta                     | DDIT3                | TF                 |      |                     | 0.00        | 100.00% | 1                          | 1  | 0   | 100.00% |
| C/EBPbeta                      | CEBPB                | TF                 |      |                     | 0.00        | 100.00% | 3                          | 2  | 1   | 38.13%  |
| DAB2                           | DAB2                 |                    |      |                     | 0.00        | 100.00% | 1                          | 1  | 0   | 100.00% |
| VIP receptor 1                 | VIPR1                |                    |      |                     | 0.00        | 100.00% | 1                          | 1  | 0   | 100.00% |
| Raptor                         | RPTOR                |                    |      |                     | 0.00        | 100.00% | 1                          | 1  | 0   | 100.00% |
| Karyopherin alpha 3            | KPNA3                |                    |      |                     | 0.00        | 100.00% | 1                          | 1  | 0   | 100.00% |
| S100A7                         | S100A7               |                    |      |                     | 0.00        | 100.00% | 1                          | 1  | 0   | 100.00% |
| CBF beta                       | CBFB                 | TF                 |      |                     | 0.00        | 100.00% | 1                          | 1  | 0   | 100.00% |
| LL37                           | CAMP                 |                    |      |                     | 0.00        | 100.00% | 1                          | 1  | 0   | 100.00% |
| COUP-TFI                       | NR2F1                | TF                 | ✓    |                     | 0.00        | 100.00% | 1                          | 1  | 0   | 100.00% |
| ODP2                           | DLAT                 |                    | ✓    |                     | 0.00        | 100.00% | 1                          | 1  | 0   | 100.00% |
| microRNA 206                   | miR-206              |                    |      |                     | 0.00        | 100.00% | 1                          | 1  | 0   | 100.00% |
| VEGF-D                         | FIGF                 |                    |      | 139-5p              | 0.00        | 100.00% | 1                          | 1  | 0   | 100.00% |
| DMTF1                          | DMTF1                | TF                 |      |                     | 0.00        | 100.00% | 1                          | 1  | 0   | 100.00% |
| PDGF-A                         | PDGFA                |                    |      |                     | 0.00        | 100.00% | 1                          | 1  | 0   | 100.00% |
| MKK7 (MAP2K7)                  | MAP2K7               |                    |      |                     | 0.00        | 100.00% | 1                          | 1  | 0   | 100.00% |
| NEIL1                          | NEIL1                |                    |      |                     | 0.00        | 100.00% | 1                          | 1  | 0   | 100.00% |
| DRAP1                          | DRAP1                | TF                 |      |                     | 0.00        | 100.00% | 1                          | 1  | 0   | 100.00% |
| TWIST1                         | TWIST1               |                    |      |                     | 0.00        | 100.00% | 1                          | 1  | 0   | 100.00% |
| Casein kinase I alpha          | CSNK1A1              |                    |      |                     | 0.00        | 100.00% | 1                          | 1  | 0   | 100.00% |
| UNG1                           | UNG                  |                    | ✓    | 101                 | 0.00        | 100.00% | 1                          | 1  | 0   | 100.00% |
| RASSF1                         | RASSF1               |                    |      |                     | 0.00        | 100.00% | 1                          | 1  | 0   | 100.00% |
| Leptin                         | LEP                  |                    |      |                     | 0.00        | 100.00% | 1                          | 1  | 0   | 100.00% |
| HSP27                          | HSPB1                |                    |      |                     | 0.00        | 100.00% | 1                          | 1  | 0   | 100.00% |
| PACE4                          | PCSK6                |                    |      |                     | 0.00        | 100.00% | 1                          | 1  | 0   | 100.00% |
| E2F1                           | E2F1                 | TF                 |      |                     | 0.00        | 100.00% | 1                          | 1  | 0   | 100.00% |
| EGR2 (Krox20)                  | EGR2                 | TF                 |      |                     | 0.00        | 100.00% | 1                          | 1  | 0   | 100.00% |
| Adrenomedullin                 | ADM                  |                    |      |                     | 0.00        | 100.00% | 1                          | 1  | 0   | 100.00% |
| ELF1                           | ELF1                 | TF                 |      |                     | 0.00        | 100.00% | 1                          | 1  | 0   | 100.00% |
| RNF138                         | RNF138               |                    |      |                     | 0.00        | 100.00% | 1                          | 1  | 0   | 100.00% |
| FAK1                           | PTK2                 |                    |      |                     | 0.00        | 100.00% | 1                          | 1  | 0   | 100.00% |
| ELF3                           | ELF3                 | TF                 |      |                     | 0.00        | 100.00% | 1                          | 1  | 0   | 100.00% |
| Elk-1                          | ELK1                 | TF                 |      |                     | 0.00        | 100.00% | 1                          | 1  | 0   | 100.00% |
| PKA-cat beta                   | PRKACB               |                    |      | 139-5p              | 0.00        | 100.00% | 1                          | 1  | 0   | 100.00% |
| ERR1                           | ESRRA                | TF                 |      |                     | 0.00        | 100.00% | 1                          | 1  | 0   | 100.00% |
| DAXX                           | DAXX                 |                    | ✓    |                     | 0.00        | 100.00% | 1                          | 1  | 0   | 100.00% |
| Tyk2                           | TYK2                 |                    |      |                     | 0.00        | 100.00% | 1                          | 1  | 0   | 100.00% |
| ETS1                           | ETS1                 | TF                 |      | 139-5p              | 0.00        | 100.00% | 2                          | 2  | 0   | 62.59%  |
| STAT5                          | STAT5                |                    |      |                     | 0.00        | 100.00% | 1                          | 1  | 0   | 100.00% |
| GRK2                           | ADRBK1               |                    |      |                     | 0.00        | 100.00% | 1                          | 1  | 0   | 100.00% |
| c-IAP1                         | BIRC2                |                    |      |                     | 0.00        | 100.00% | 1                          | 1  | 0   | 100.00% |
| SAT-1                          | SLC26A1              |                    |      |                     | 0.00        | 100.00% | 1                          | 1  | 0   | 100.00% |
| c-Abl                          | ABL1                 |                    |      |                     | 0.00        | 100.00% | 1                          | 1  | 0   | 100.00% |
| G-CSF                          | CSF3                 |                    |      |                     | 0.00        | 100.00% | 1                          | 1  | 0   | 100.00% |
| ETS2                           | ETS2                 | TF                 |      |                     | 0.00        | 100.00% | 1                          | 1  | 0   | 100.00% |
| Rad51                          | RAD51                |                    |      |                     | 0.00        | 100.00% | 1                          | 1  | 0   | 100.00% |
| microRNA 214                   | miR-214              |                    |      |                     | 0.00        | 100.00% | 1                          | 1  | 0   | 100.00% |
| FKHR                           | FOXO1                | TF                 |      |                     | 0.00        | 100.00% | 1                          | 1  | 0   | 100.00% |
| OAS2                           | OAS2                 |                    | ✓    |                     | 0.00        | 100.00% | 1                          | 1  | 0   | 100.00% |
| p15                            | CDKN2B               |                    |      |                     | 0.00        | 100.00% | 1                          | 1  | 0   | 100.00% |
| FOXF1                          | FOXF1                | TF                 |      |                     | 0.00        | 100.00% | 1                          | 1  | 0   | 100.00% |
| DAPK1                          | DAPK1                |                    |      |                     | 0.00        | 100.00% | 1                          | 1  | 0   | 100.00% |
| G-protein alpha-q/11           | G-protein alpha-q/11 |                    |      |                     | 0.00        | 100.00% | 1                          | 1  | 0   | 100.00% |
| FOXF2                          | FOXF2                | TF                 |      |                     | 0.00        | 100.00% | 1                          | 1  | 0   | 100.00% |
| MMP-12                         | MMP12                |                    |      |                     | 0.00        | 100.00% | 1                          | 1  | 0   | 100.00% |
| YAP1 (YAp65)                   | YAP1                 |                    |      | 199-3p              | 0.00        | 100.00% | 1                          | 1  | 0   | 100.00% |
| FOXO3A                         | FOXO3                | TF                 |      |                     | 0.00        | 100.00% | 1                          | 1  | 0   | 100.00% |
| PELP1                          | PELP1                |                    |      |                     | 0.00        | 100.00% | 1                          | 1  | 0   | 100.00% |
| SHP-1                          | PTPN6                |                    |      |                     | 0.00        | 100.00% | 1                          | 1  | 0   | 100.00% |
| FHL2                           | FHL2                 |                    | ✓    |                     | 0.00        | 100.00% | 1                          | 1  | 0   | 100.00% |
| PP2A catalytic                 | PP2A catalytic       |                    |      |                     | 0.00        | 100.00% | 1                          | 1  | 0   | 100.00% |
| CILP                           | CILP                 |                    |      |                     | 0.00        | 100.00% | 1                          | 1  | 0   | 100.00% |
| ELL2                           | ELL2                 |                    | ✓    | 139-5p              | 0.00        | 100.00% | 1                          | 1  | 0   | 100.00% |
| Clusterin                      | CLU                  |                    |      |                     | 0.00        | 100.00% | 1                          | 1  | 0   | 100.00% |
| FOXP1                          | FOXP1                | TF                 |      | 139-5p, 199-3p      | 0.00        | 100.00% | 1                          | 1  | 0   | 100.00% |
| GC1QBP                         | C1QBP                |                    |      |                     | 0.00        | 100.00% | 1                          | 1  | 0   | 100.00% |
| FOXP3                          | FOXP3                | TF                 |      |                     | 0.00        | 100.00% | 1                          | 1  | 0   | 100.00% |
| TIMP2                          | TIMP2                |                    |      |                     | 0.00        | 100.00% | 1                          | 1  | 0   | 100.00% |
| PI3K cat class IB (p110-gamma) | PIK3CG               |                    |      |                     | 0.00        | 100.00% | 1                          | 1  | 0   | 100.00% |
| GATA-6                         | GATA6                | TF                 |      |                     | 0.00        | 100.00% | 1                          | 1  | 0   | 100.00% |
| Golgin-45 (BLZF1)              | BLZF1                | TF                 | ✓    |                     | 0.00        | 100.00% | 2                          | 2  | 0   | 62.59%  |



| GeneGO Object Name       | Mapped Gene Symbol       | Molecular Function | DEGs | Predicted Targets † | Betweenness |         | # of Interactions (Degree) |    |     |         |
|--------------------------|--------------------------|--------------------|------|---------------------|-------------|---------|----------------------------|----|-----|---------|
|                          |                          |                    |      |                     | Value       | Rank*   | Total                      | In | Out | Rank*   |
| DJ-1                     | PARK7                    |                    |      |                     | 0.00        | 100.00% | 1                          | 1  | 0   | 100.00% |
| TAFII28                  | TAF11                    |                    |      |                     | 0.00        | 100.00% | 1                          | 1  | 0   | 100.00% |
| HNF4-alpha               | HNF4A                    | TF                 | ✓    |                     | 0.00        | 100.00% | 1                          | 1  | 0   | 100.00% |
| MAP3K3                   | MAP3K3                   |                    |      |                     | 0.00        | 100.00% | 1                          | 1  | 0   | 100.00% |
| TIMP1                    | TIMP1                    |                    |      |                     | 0.00        | 100.00% | 1                          | 1  | 0   | 100.00% |
| TAFI48                   | TAF1A                    |                    | ✓    |                     | 0.00        | 100.00% | 1                          | 1  | 0   | 100.00% |
| TRIP6                    | TRIP6                    |                    |      |                     | 0.00        | 100.00% | 1                          | 1  | 0   | 100.00% |
| HOXB3                    | HOXB3                    | TF                 |      | 139-5p              | 0.00        | 100.00% | 1                          | 1  | 0   | 100.00% |
| SARA                     | ZFYVE9                   |                    |      |                     | 0.00        | 100.00% | 1                          | 1  | 0   | 100.00% |
| GSK3 beta                | GSK3B                    |                    |      |                     | 0.00        | 100.00% | 1                          | 1  | 0   | 100.00% |
| MSH6                     | MSH6                     |                    |      |                     | 0.00        | 100.00% | 1                          | 1  | 0   | 100.00% |
| CLIP170                  | CLIP1                    |                    |      |                     | 0.00        | 100.00% | 1                          | 1  | 0   | 100.00% |
| HSF1                     | HSF1                     | TF                 |      |                     | 0.00        | 100.00% | 1                          | 1  | 0   | 100.00% |
| A-FABP                   | FABP4                    |                    |      |                     | 0.00        | 100.00% | 1                          | 1  | 0   | 100.00% |
| FBXW7                    | FBXW7                    | EPIGENES           |      |                     | 0.00        | 100.00% | 1                          | 1  | 0   | 100.00% |
| ID1                      | ID1                      |                    |      |                     | 0.00        | 100.00% | 1                          | 1  | 0   | 100.00% |
| ERK1/2                   | ERK1/2                   |                    |      |                     | 0.00        | 100.00% | 1                          | 1  | 0   | 100.00% |
| MJD (ataxin-3)           | ATXN3                    |                    |      |                     | 0.00        | 100.00% | 1                          | 1  | 0   | 100.00% |
| CtBP2                    | CtBP2                    |                    |      |                     | 0.00        | 100.00% | 1                          | 1  | 0   | 100.00% |
| Cystatin A               | CSTA                     |                    |      |                     | 0.00        | 100.00% | 1                          | 1  | 0   | 100.00% |
| HSF2                     | HSF2                     | TF                 | ✓    |                     | 0.00        | 100.00% | 1                          | 1  | 0   | 100.00% |
| IRF1                     | IRF1                     | TF                 |      |                     | 0.00        | 100.00% | 1                          | 1  | 0   | 100.00% |
| RAGE                     | AGER                     |                    |      |                     | 0.00        | 100.00% | 1                          | 1  | 0   | 100.00% |
| HB-EGF                   | HBEGF                    |                    |      |                     | 0.00        | 100.00% | 1                          | 1  | 0   | 100.00% |
| p14ARF                   | CDKN2A                   |                    | ✓    |                     | 137.24      | 74.22%  | 3                          | 3  | 0   | 38.13%  |
| PRMT1                    | PRMT1                    | EPIGENES           |      |                     | 0.00        | 100.00% | 1                          | 1  | 0   | 100.00% |
| BMP4                     | BMP4                     |                    |      |                     | 0.00        | 100.00% | 1                          | 1  | 0   | 100.00% |
| p16INK4                  | CDKN2A                   |                    | ✓    |                     | 395.15      | 54.69%  | 6                          | 6  | 0   | 15.83%  |
| IRF4                     | IRF4                     | TF                 |      |                     | 0.00        | 100.00% | 1                          | 1  | 0   | 100.00% |
| CDK4                     | CDK4                     |                    |      |                     | 0.00        | 100.00% | 1                          | 1  | 0   | 100.00% |
| TARBP1                   | TARBP1                   |                    | ✓    |                     | 0.00        | 100.00% | 1                          | 1  | 0   | 100.00% |
| microRNA 221             | miR-221                  |                    |      |                     | 0.00        | 100.00% | 1                          | 1  | 0   | 100.00% |
| DKK1                     | DKK1                     |                    |      |                     | 0.00        | 100.00% | 1                          | 1  | 0   | 100.00% |
| p300                     | EP300                    | EPIGENES           |      |                     | 0.00        | 100.00% | 1                          | 1  | 0   | 100.00% |
| WNT3A                    | WNT3A                    |                    |      |                     | 0.00        | 100.00% | 1                          | 1  | 0   | 100.00% |
| LCKBP1                   | HCLS1                    | TF                 | ✓    |                     | 0.00        | 100.00% | 1                          | 1  | 0   | 100.00% |
| TRAF7                    | TRAF7                    |                    | ✓    |                     | 0.00        | 100.00% | 1                          | 1  | 0   | 100.00% |
| MEF2A                    | MEF2A                    | TF                 |      |                     | 0.00        | 100.00% | 1                          | 1  | 0   | 100.00% |
| MEF2C                    | MEF2C                    | TF                 |      |                     | 0.00        | 100.00% | 1                          | 1  | 0   | 100.00% |
| Twinfilin                | TWF1                     |                    | ✓    |                     | 0.00        | 100.00% | 1                          | 1  | 0   | 100.00% |
| A1U                      | UBQLN4                   |                    | ✓    |                     | 0.00        | 100.00% | 1                          | 1  | 0   | 100.00% |
| Cyclin E                 | CCNE1                    |                    |      |                     | 0.00        | 100.00% | 1                          | 1  | 0   | 100.00% |
| MEF2D                    | MEF2D                    | TF                 |      |                     | 0.00        | 100.00% | 1                          | 1  | 0   | 100.00% |
| Brca1                    | BRCA1                    |                    |      |                     | 0.00        | 100.00% | 1                          | 1  | 0   | 100.00% |
| MYF5                     | MYF5                     | TF                 |      |                     | 0.00        | 100.00% | 1                          | 1  | 0   | 100.00% |
| RAIDD                    | CRADD                    |                    |      |                     | 0.00        | 100.00% | 1                          | 1  | 0   | 100.00% |
| MYF6                     | MYF6                     | TF                 |      |                     | 0.00        | 100.00% | 1                          | 1  | 0   | 100.00% |
| MYOD                     | MYOD1                    | TF                 |      |                     | 0.00        | 100.00% | 1                          | 1  | 0   | 100.00% |
| MYOG                     | MYOG                     | TF                 |      |                     | 0.00        | 100.00% | 1                          | 1  | 0   | 100.00% |
| CRK                      | CRK                      |                    |      |                     | 0.00        | 100.00% | 1                          | 1  | 0   | 100.00% |
| PCNA                     | PCNA                     |                    |      |                     | 0.00        | 100.00% | 1                          | 1  | 0   | 100.00% |
| Shc                      | SHC1                     |                    |      | 139-5p              | 0.00        | 100.00% | 1                          | 1  | 0   | 100.00% |
| N-CoR                    | NCOR1                    | TF                 | ✓    |                     | 0.00        | 100.00% | 1                          | 1  | 0   | 100.00% |
| VEGFR-3                  | FLT4                     |                    |      |                     | 0.00        | 100.00% | 1                          | 1  | 0   | 100.00% |
| Prolactin                | PRL                      |                    |      |                     | 0.00        | 100.00% | 1                          | 1  | 0   | 100.00% |
| SOD2                     | SOD2                     |                    | ✓    |                     | 0.00        | 100.00% | 2                          | 2  | 0   | 62.59%  |
| NANOG                    | NANOG                    | TF                 |      |                     | 0.00        | 100.00% | 1                          | 1  | 0   | 100.00% |
| GFER                     | GFER                     |                    |      |                     | 0.00        | 100.00% | 1                          | 1  | 0   | 100.00% |
| GRB2                     | GRB2                     |                    |      |                     | 0.00        | 100.00% | 1                          | 1  | 0   | 100.00% |
| PIAS4                    | PIAS4                    |                    |      |                     | 0.00        | 100.00% | 1                          | 1  | 0   | 100.00% |
| 14-3-3 zeta/delta        | YWHAZ                    |                    |      | 199-3p              | 0.00        | 100.00% | 1                          | 1  | 0   | 100.00% |
| Cystatin B               | CSTB                     |                    |      |                     | 0.00        | 100.00% | 1                          | 1  | 0   | 100.00% |
| BMP2                     | BMP2                     |                    |      |                     | 0.00        | 100.00% | 1                          | 1  | 0   | 100.00% |
| NF-AT3(NFATC4)           | NFATC4                   | TF                 |      |                     | 0.00        | 100.00% | 1                          | 1  | 0   | 100.00% |
| c-Raf-1                  | RAF1                     |                    |      |                     | 0.00        | 100.00% | 1                          | 1  | 0   | 100.00% |
| microRNA 21              | miR-21                   |                    |      |                     | 0.00        | 100.00% | 1                          | 1  | 0   | 100.00% |
| NF-Y                     | NF-Y                     |                    |      |                     | 0.00        | 100.00% | 1                          | 1  | 0   | 100.00% |
| MMP-14                   | MMP14                    |                    | ✓    |                     | 0.00        | 100.00% | 1                          | 1  | 0   | 100.00% |
| p130CAS                  | BCAR1                    |                    |      |                     | 0.00        | 100.00% | 1                          | 1  | 0   | 100.00% |
| Galectin-3               | LGALS3                   |                    |      |                     | 0.00        | 100.00% | 1                          | 1  | 0   | 100.00% |
| ARID4B                   | ARID4B                   |                    | ✓    | 101, 199-3p         | 0.00        | 100.00% | 2                          | 1  | 1   | 62.59%  |
| FasR(CD95)               | FAS                      |                    |      |                     | 0.00        | 100.00% | 1                          | 1  | 0   | 100.00% |
| HDAC2                    | HDAC2                    | EPIGENES           |      | 139-5p              | 0.00        | 100.00% | 1                          | 1  | 0   | 100.00% |
| I-kB                     | I-kB                     |                    |      |                     | 0.00        | 100.00% | 1                          | 1  | 0   | 100.00% |
| Pc2 (CBX4)               | CBX4                     | EPIGENES           | ✓    |                     | 0.00        | 100.00% | 1                          | 1  | 0   | 100.00% |
| E7 protein (HPV16)       | E7 protein (HPV16)       |                    |      |                     | 0.00        | 100.00% | 1                          | 1  | 0   | 100.00% |
| ACM3                     | CHRM3                    |                    |      |                     | 0.00        | 100.00% | 1                          | 1  | 0   | 100.00% |
| G-protein alpha-i family | G-protein alpha-i family |                    |      |                     | 0.00        | 100.00% | 1                          | 1  | 0   | 100.00% |
| alpha-V/beta-3 integrin  | alpha-V/beta-3 integrin  |                    |      |                     | 0.00        | 100.00% | 1                          | 1  | 0   | 100.00% |
| MBD1                     | MBD1                     | EPIGENES           |      |                     | 0.00        | 100.00% | 1                          | 1  | 0   | 100.00% |
| Sortilin                 | SORT1                    |                    | ✓    |                     | 0.00        | 100.00% | 1                          | 1  | 0   | 100.00% |
| Ifi202a                  | Ifi202a                  |                    |      |                     | 0.00        | 100.00% | 1                          | 1  | 0   | 100.00% |
| EGF                      | EGF                      |                    |      |                     | 0.00        | 100.00% | 1                          | 1  | 0   | 100.00% |
| PAX8                     | PAX8                     | TF                 |      |                     | 0.00        | 100.00% | 1                          | 1  | 0   | 100.00% |
| IKK-gamma                | IKBKG                    |                    |      |                     | 0.00        | 100.00% | 1                          | 1  | 0   | 100.00% |
| IL-18                    | IL18                     |                    |      |                     | 0.00        | 100.00% | 1                          | 1  | 0   | 100.00% |
| APEX                     | APEX1                    |                    |      |                     | 0.00        | 100.00% | 1                          | 1  | 0   | 100.00% |
| VEGF-A                   | VEGFA                    |                    |      |                     | 0.00        | 100.00% | 1                          | 1  | 0   | 100.00% |
| LIN-28B                  | LIN28B                   |                    | ✓    | 101, 199-3p         | 0.00        | 100.00% | 1                          | 1  | 0   | 100.00% |
| CDYL                     | CDYL                     | EPIGENES           | ✓    | 101                 | 0.00        | 100.00% | 1                          | 1  | 0   | 100.00% |
| JMJD2A                   | KDM4A                    | EPIGENES           |      |                     | 0.00        | 100.00% | 1                          | 1  | 0   | 100.00% |
| Mi-2 alpha               | CHD3                     | EPIGENES           |      |                     | 0.00        | 100.00% | 1                          | 1  | 0   | 100.00% |
| BRD8                     | BRD8                     | EPIGENES           | ✓    |                     | 0.00        | 100.00% | 1                          | 1  | 0   | 100.00% |
| alpha-11/beta-1 integrin | alpha-11/beta-1 integrin |                    |      |                     | 0.00        | 100.00% | 1                          | 1  | 0   | 100.00% |
| PPARGC1 (PGC1-alpha)     | PPARGC1A                 |                    |      | 139-5p              | 0.00        | 100.00% | 1                          | 1  | 0   | 100.00% |
| IRS-1                    | IRS1                     |                    |      |                     | 0.00        | 100.00% | 1                          | 1  | 0   | 100.00% |
| IL-5                     | IL5                      |                    |      |                     | 0.00        | 100.00% | 1                          | 1  | 0   | 100.00% |
| PLAU (UPA)               | PLAU                     |                    |      |                     | 0.00        | 100.00% | 1                          | 1  | 0   | 100.00% |
| IL-12                    | IL-12                    |                    |      |                     | 0.00        | 100.00% | 1                          | 1  | 0   | 100.00% |
| MEK4(MAP2K4)             | MAP2K4                   |                    |      |                     | 0.00        | 100.00% | 1                          | 1  | 0   | 100.00% |
| Pdx-1 (IPF1)             | PDX1                     | TF                 |      |                     | 0.00        | 100.00% | 1                          | 1  | 0   | 100.00% |
| IL-4R type II            | IL-4R type II            |                    |      |                     | 0.00        | 100.00% | 1                          | 1  | 0   | 100.00% |
| TGF-beta 1               | TGFB1                    |                    |      | 139-5p              | 0.00        | 100.00% | 1                          | 1  | 0   | 100.00% |
| HMGII/Y                  | HMGAI                    | EPIGENES           |      |                     | 0.00        | 100.00% | 2                          | 1  | 1   | 62.59%  |
| PIT1                     | POU1F1                   | TF                 |      |                     | 0.00        | 100.00% | 2                          | 2  | 0   | 62.59%  |
| POU3F2 (BRN2)            | POU3F2                   | TF                 |      |                     | 0.00        | 100.00% | 1                          | 1  | 0   | 100.00% |
| MMP-9                    | MMP9                     |                    |      |                     | 0.00        | 100.00% | 1                          | 1  | 0   | 100.00% |
| IL-2                     | IL2                      |                    |      |                     | 0.00        | 100.00% | 1                          | 1  | 0   | 100.00% |

| GeneGO Object Name      | Mapped Gene Symbol      | Molecular Function | DEGs | Predicted Targets † | Betweenness |         | # of Interactions (Degree) |    |     |         |
|-------------------------|-------------------------|--------------------|------|---------------------|-------------|---------|----------------------------|----|-----|---------|
|                         |                         |                    |      |                     | Value       | Rank*   | Total                      | In | Out | Rank*   |
| PU.1                    | SP1                     | TF                 |      |                     | 0.00        | 100.00% | 1                          | 1  | 0   | 100.00% |
| microRNA 155            | miR-155                 |                    |      |                     | 0.00        | 100.00% | 1                          | 1  | 0   | 100.00% |
| Rb protein              | RB1                     | TF                 |      | 199-3p              | 0.00        | 100.00% | 1                          | 1  | 0   | 100.00% |
| MAPKAPK5                | MAPKAPK5                |                    | ✓    |                     | 0.00        | 100.00% | 1                          | 1  | 0   | 100.00% |
| SDF-1                   | CXCL12                  |                    |      |                     | 0.00        | 100.00% | 1                          | 1  | 0   | 100.00% |
| VEGFR-2                 | KDR                     |                    |      |                     | 0.00        | 100.00% | 1                          | 1  | 0   | 100.00% |
| RD protein              | RDBP                    |                    | ✓    |                     | 0.00        | 100.00% | 1                          | 1  | 0   | 100.00% |
| B-Raf                   | BRAF                    |                    |      |                     | 0.00        | 100.00% | 1                          | 1  | 0   | 100.00% |
| RUNX3                   | RUNX3                   | TF                 |      |                     | 0.00        | 100.00% | 1                          | 1  | 0   | 100.00% |
| GSK3 alpha              | GSK3A                   |                    |      |                     | 0.00        | 100.00% | 1                          | 1  | 0   | 100.00% |
| SATB2                   | SATB2                   | TF                 |      |                     | 0.00        | 100.00% | 1                          | 1  | 0   | 100.00% |
| MDM2                    | MDM2                    |                    |      |                     | 0.00        | 100.00% | 1                          | 1  | 0   | 100.00% |
| Btk                     | BTK                     |                    |      |                     | 0.00        | 100.00% | 1                          | 1  | 0   | 100.00% |
| SHP                     | NR0B2                   | TF                 |      |                     | 0.00        | 100.00% | 1                          | 1  | 0   | 100.00% |
| RBB2                    | KDM5A                   | EPIGENES           | ✓    |                     | 0.00        | 100.00% | 1                          | 1  | 0   | 100.00% |
| miR-199-3p              | miR-199-3p              |                    |      |                     | 0.00        | 100.00% | 1                          | 1  | 0   | 100.00% |
| Thioredoxin             | TXN                     |                    |      |                     | 0.00        | 100.00% | 1                          | 1  | 0   | 100.00% |
| SMAD2                   | SMAD2                   | TF                 |      | 139-5p              | 0.00        | 100.00% | 1                          | 1  | 0   | 100.00% |
| SMAD4                   | SMAD4                   | TF                 |      |                     | 0.00        | 100.00% | 1                          | 1  | 0   | 100.00% |
| CCL2                    | CCL2                    |                    |      |                     | 0.00        | 100.00% | 1                          | 1  | 0   | 100.00% |
| Crkl                    | CRKL                    |                    |      |                     | 0.00        | 100.00% | 1                          | 1  | 0   | 100.00% |
| BMPR1B                  | BMPR1B                  |                    |      |                     | 0.00        | 100.00% | 1                          | 1  | 0   | 100.00% |
| HDAC1                   | HDAC1                   | EPIGENES           |      |                     | 0.00        | 100.00% | 1                          | 1  | 0   | 100.00% |
| UFO                     | AXL                     |                    | ✓    | 139-5p              | 0.00        | 100.00% | 1                          | 1  | 0   | 100.00% |
| SMAD5                   | SMAD5                   | TF                 | ✓    |                     | 0.00        | 100.00% | 1                          | 1  | 0   | 100.00% |
| SP1/SP3 complex         | SP1                     | TF                 |      | 199-3p              | 0.00        | 100.00% | 3                          | 2  | 1   | 38.13%  |
| PKC-delta               | PRKCD                   |                    |      |                     | 0.00        | 100.00% | 1                          | 1  | 0   | 100.00% |
| SRF                     | SRF                     | TF                 |      |                     | 0.00        | 100.00% | 1                          | 1  | 0   | 100.00% |
| PRNP                    | PRNP                    |                    | ✓    |                     | 0.00        | 100.00% | 1                          | 1  | 0   | 100.00% |
| ELAVL1 (HuR)            | ELAVL1                  |                    |      |                     | 0.00        | 100.00% | 1                          | 1  | 0   | 100.00% |
| PARP-2                  | PARP2                   |                    |      |                     | 0.00        | 100.00% | 1                          | 1  | 0   | 100.00% |
| microRNA 222            | miR-222                 |                    |      |                     | 0.00        | 100.00% | 1                          | 1  | 0   | 100.00% |
| IL-1 beta               | IL1B                    |                    |      |                     | 0.00        | 100.00% | 1                          | 1  | 0   | 100.00% |
| IL8RB                   | CXCR2                   |                    |      |                     | 0.00        | 100.00% | 1                          | 1  | 0   | 100.00% |
| KNG                     | KNG1                    |                    |      |                     | 0.00        | 100.00% | 1                          | 1  | 0   | 100.00% |
| Sry                     | SRY                     | TF                 |      |                     | 0.00        | 100.00% | 1                          | 1  | 0   | 100.00% |
| alpha-5/beta-1 integrin | alpha-5/beta-1 integrin |                    |      |                     | 0.00        | 100.00% | 1                          | 1  | 0   | 100.00% |
| P4HA1                   | P4HA1                   |                    | ✓    |                     | 0.00        | 100.00% | 2                          | 2  | 0   | 62.59%  |
| STAT2                   | STAT2                   | TF                 |      |                     | 0.00        | 100.00% | 1                          | 1  | 0   | 100.00% |
| CHD6                    | CHD6                    | EPIGENES           | ✓    | 101                 | 0.00        | 100.00% | 2                          | 1  | 1   | 62.59%  |
| UBF                     | UBTF                    |                    |      |                     | 0.00        | 100.00% | 1                          | 1  | 0   | 100.00% |
| VDR                     | VDR                     | TF                 |      |                     | 0.00        | 100.00% | 1                          | 1  | 0   | 100.00% |
| G-protein alpha-s       | GNAS                    |                    |      |                     | 0.00        | 100.00% | 1                          | 1  | 0   | 100.00% |
| GMF-gamma               | GMFG                    |                    | ✓    |                     | 0.00        | 100.00% | 1                          | 1  | 0   | 100.00% |
| TrkA                    | NTRK1                   |                    |      |                     | 0.00        | 100.00% | 1                          | 1  | 0   | 100.00% |
| IL-9                    | IL9                     |                    |      |                     | 0.00        | 100.00% | 1                          | 1  | 0   | 100.00% |
| alpha-3/beta-1 integrin | alpha-3/beta-1 integrin |                    |      |                     | 0.00        | 100.00% | 1                          | 1  | 0   | 100.00% |
| XBP1                    | XBP1                    | TF                 |      |                     | 0.00        | 100.00% | 1                          | 1  | 0   | 100.00% |
| IKK (cat)               | IKK (cat)               |                    |      |                     | 0.00        | 100.00% | 1                          | 1  | 0   | 100.00% |
| Granzyme B              | GZMB                    |                    |      |                     | 0.00        | 100.00% | 1                          | 1  | 0   | 100.00% |
| SUZ12                   | SUZ12                   | EPIGENES           | ✓    |                     | 0.00        | 100.00% | 1                          | 1  | 0   | 100.00% |
| Protein kinase G1 alpha | PRKG1                   |                    |      |                     | 0.00        | 100.00% | 1                          | 1  | 0   | 100.00% |
| ARPC4                   | ARPC4                   |                    | ✓    |                     | 0.00        | 100.00% | 1                          | 1  | 0   | 100.00% |
| ZNF207                  | ZNF207                  | TF                 | ✓    | 101                 | 0.00        | 100.00% | 1                          | 1  | 0   | 100.00% |
| SETDB1                  | SETDB1                  | EPIGENES           |      |                     | 0.00        | 100.00% | 1                          | 1  | 0   | 100.00% |
| Ski                     | SKI                     |                    |      |                     | 0.00        | 100.00% | 1                          | 1  | 0   | 100.00% |
| ZNF33A                  | ZNF33A                  | TF                 | ✓    | 101                 | 0.00        | 100.00% | 1                          | 1  | 0   | 100.00% |
| HDAC3                   | HDAC3                   | EPIGENES           |      |                     | 0.00        | 100.00% | 1                          | 1  | 0   | 100.00% |
| L1CAM                   | L1CAM                   |                    |      |                     | 0.00        | 100.00% | 1                          | 1  | 0   | 100.00% |

\* Rank percentile

† Predicted by TargetScan and context score < -0.2

**Supplementary table S8. Topological properties of miR-139-5p sub-network for cluster C6 network**

| GeneGO Object Name                | Mapped Gene Symbol                | Molecular Function | DEGs | Predicted Targets † | Betweenness |         | # of Interactions (Degree) |    |     |         |
|-----------------------------------|-----------------------------------|--------------------|------|---------------------|-------------|---------|----------------------------|----|-----|---------|
|                                   |                                   |                    |      |                     | Value       | Rank*   | Total                      | In | Out | Rank*   |
| AP-1                              | FOS                               | TF                 |      | 101, 139-5p, 199-3p | 65132.05    | 1.35%   | 184                        | 5  | 179 | 1.18%   |
| miR-139-5p                        | miR-139-5p                        |                    |      |                     | 35929.06    | 2.70%   | 50                         | 1  | 49  | 2.35%   |
| LRH1                              | NR5A2                             | TF                 | ✓    | 139-5p              | 4249.50     | 4.05%   | 14                         | 3  | 11  | 3.53%   |
| Caspase-3                         | CASP3                             |                    |      | 101, 139-5p         | 3954.45     | 5.41%   | 10                         | 1  | 9   | 7.06%   |
| Shc                               | SHC1                              |                    |      | 139-5p              | 3014.50     | 6.76%   | 8                          | 1  | 7   | 8.24%   |
| ETS1                              | ETS1                              | TF                 |      | 139-5p              | 2548.65     | 8.11%   | 13                         | 2  | 11  | 4.71%   |
| ERR3                              | ESRRG                             | TF                 | ✓    | 139-5p              | 2475.56     | 9.46%   | 12                         | 2  | 10  | 5.88%   |
| ASK1 (MAP3K5)                     | MAP3K5                            |                    |      | 101, 139-5p, 199-3p | 2268.00     | 10.81%  | 5                          | 1  | 4   | 16.47%  |
| AKT(PKB)                          | AKT(PKB)                          |                    |      |                     | 2150.87     | 12.16%  | 6                          | 2  | 4   | 12.94%  |
| AML1 (RUNX1)                      | RUNX1                             | TF                 |      | 101, 139-5p, 199-3p | 2074.74     | 13.51%  | 8                          | 1  | 7   | 8.24%   |
| TIF1-alpha                        | TRIM24                            | EPIGENES           | ✓    | 101, 139-5p         | 1622.79     | 14.86%  | 7                          | 1  | 6   | 10.59%  |
| FKHR                              | FOXO1                             | TF                 |      |                     | 1335.49     | 16.22%  | 7                          | 1  | 6   | 10.59%  |
| Collagen IV                       | Collagen IV                       |                    |      |                     | 1138.00     | 17.57%  | 3                          | 1  | 2   | 23.53%  |
| PP2A catalytic                    | PP2A catalytic                    |                    |      |                     | 1138.00     | 17.57%  | 3                          | 1  | 2   | 23.53%  |
| TFIIH                             | TFIIH                             |                    |      |                     | 1138.00     | 17.57%  | 3                          | 1  | 2   | 23.53%  |
| Thrombospondin 1                  | THBS1                             |                    |      | 139-5p              | 1138.00     | 17.57%  | 4                          | 2  | 2   | 17.65%  |
| VEGF-D                            | FIGF                              |                    |      | 139-5p              | 1029.07     | 22.97%  | 4                          | 2  | 2   | 17.65%  |
| CXCR4                             | CXCR4                             |                    |      | 139-5p              | 845.83      | 24.32%  | 3                          | 1  | 2   | 23.53%  |
| MRK                               | ICK                               |                    | ✓    | 101, 139-5p         | 842.51      | 25.68%  | 3                          | 1  | 2   | 23.53%  |
| G-protein alpha-i family          | G-protein alpha-i family          |                    |      |                     | 753.67      | 27.03%  | 3                          | 1  | 2   | 23.53%  |
| PPARGC1 (PGC1-alpha)              | PPARGC1A                          |                    |      | 139-5p              | 734.78      | 28.38%  | 6                          | 3  | 3   | 12.94%  |
| SHP                               | NR0B2                             | TF                 |      |                     | 672.52      | 29.73%  | 3                          | 3  | 0   | 23.53%  |
| HDAC2                             | HDAC2                             | EPIGENES           |      | 139-5p              | 658.63      | 31.08%  | 6                          | 2  | 4   | 12.94%  |
| TGF-beta 1                        | TGFB1                             |                    |      | 139-5p              | 643.40      | 32.43%  | 4                          | 2  | 2   | 17.65%  |
| NF-AT2(NFATC1)                    | NFATC1                            | TF                 |      | 139-5p              | 607.58      | 33.78%  | 3                          | 1  | 2   | 23.53%  |
| Ataxin-1                          | ATXN1                             |                    |      | 101, 139-5p         | 570.00      | 35.14%  | 2                          | 1  | 1   | 45.88%  |
| Bcl-2                             | BCL2                              |                    |      | 139-5p              | 570.00      | 35.14%  | 2                          | 1  | 1   | 45.88%  |
| Galpha(q)-specific frizzled GPCRs | Galpha(q)-specific frizzled GPCRs |                    |      |                     | 570.00      | 35.14%  | 2                          | 1  | 1   | 45.88%  |
| Importin (karyopherin)-beta       | Importin (karyopherin)-beta       |                    |      |                     | 570.00      | 35.14%  | 2                          | 1  | 1   | 45.88%  |
| NRSF                              | REST                              |                    |      |                     | 570.00      | 35.14%  | 2                          | 0  | 2   | 45.88%  |
| PKC-alpha                         | PRKCA                             |                    |      | 139-5p              | 570.00      | 35.14%  | 2                          | 1  | 1   | 45.88%  |
| PTEN                              | PTEN                              |                    |      | 139-5p              | 570.00      | 35.14%  | 3                          | 2  | 1   | 23.53%  |
| SRPK1                             | SRPK1                             |                    | ✓    | 139-5p              | 570.00      | 35.14%  | 2                          | 1  | 1   | 45.88%  |
| UFO                               | AXL                               |                    | ✓    | 139-5p              | 462.00      | 45.95%  | 3                          | 1  | 2   | 23.53%  |
| HOXB3                             | HOXB3                             | TF                 |      | 139-5p              | 460.40      | 47.30%  | 3                          | 2  | 1   | 23.53%  |
| Beta-catenin                      | CTNNB1                            | TF                 |      |                     | 418.32      | 48.65%  | 3                          | 3  | 0   | 23.53%  |
| Cyclin D1                         | CCND1                             |                    |      |                     | 418.32      | 48.65%  | 2                          | 2  | 0   | 45.88%  |
| c-Myc                             | MYC                               | TF                 |      |                     | 418.32      | 48.65%  | 2                          | 2  | 0   | 45.88%  |
| Androgen receptor                 | AR                                | TF                 |      |                     | 366.78      | 52.70%  | 3                          | 3  | 0   | 23.53%  |
| KLF4                              | KLF4                              | TF                 | ✓    |                     | 343.41      | 54.05%  | 3                          | 3  | 0   | 23.53%  |
| EGR1                              | EGR1                              | TF                 | ✓    |                     | 335.00      | 55.41%  | 4                          | 4  | 0   | 17.65%  |
| SOD2                              | SOD2                              |                    | ✓    |                     | 329.22      | 56.76%  | 3                          | 3  | 0   | 23.53%  |
| ESR1 (nuclear)                    | ESR1                              | TF                 |      |                     | 280.93      | 58.11%  | 2                          | 2  | 0   | 45.88%  |
| p53                               | TP53                              | TF                 |      |                     | 280.93      | 58.11%  | 2                          | 2  | 0   | 45.88%  |
| ERR1                              | ESRRA                             | TF                 |      |                     | 218.86      | 60.81%  | 2                          | 2  | 0   | 45.88%  |
| RAR-alpha/RXR-alpha               | RAR-alpha/RXR-alpha               | TF                 |      |                     | 218.86      | 60.81%  | 2                          | 2  | 0   | 45.88%  |
| RUNX2                             | RUNX2                             | TF                 |      |                     | 218.86      | 60.81%  | 2                          | 2  | 0   | 45.88%  |
| YY1                               | YY1                               | TF                 |      |                     | 218.86      | 60.81%  | 2                          | 2  | 0   | 45.88%  |
| TMF1                              | TMF1                              |                    | ✓    | 101, 139-5p         | 199.57      | 66.22%  | 4                          | 1  | 3   | 17.65%  |
| M-CSF receptor                    | CSF1R                             |                    | ✓    |                     | 161.53      | 67.57%  | 3                          | 3  | 0   | 23.53%  |
| IGF-1                             | IGF-1                             |                    |      |                     | 156.40      | 68.92%  | 2                          | 2  | 0   | 45.88%  |
| TARBP1                            | TARBP1                            |                    | ✓    |                     | 156.40      | 68.92%  | 2                          | 2  | 0   | 45.88%  |
| NOTCH1 (NICD)                     | NOTCH1 (NICD)                     |                    |      |                     | 152.62      | 71.62%  | 2                          | 1  | 1   | 45.88%  |
| PKA-cat beta                      | PRKACB                            |                    |      | 139-5p              | 107.60      | 72.97%  | 2                          | 1  | 1   | 45.88%  |
| alpha-V/beta-3 integrin           | alpha-V/beta-3 integrin           |                    |      |                     | 106.93      | 74.32%  | 2                          | 1  | 1   | 45.88%  |
| PAX3                              | PAX3                              | TF                 |      |                     | 79.12       | 75.68%  | 2                          | 2  | 0   | 45.88%  |
| STAT3                             | STAT3                             | TF                 |      |                     | 79.12       | 75.68%  | 2                          | 2  | 0   | 45.88%  |
| SMAD2                             | SMAD2                             | TF                 |      | 139-5p              | 73.40       | 78.38%  | 3                          | 1  | 2   | 23.53%  |
| IBP5                              | IGFBP5                            |                    |      | 101, 139-5p         | 72.73       | 79.73%  | 2                          | 1  | 1   | 45.88%  |
| TCP1                              | TCP1                              |                    |      |                     | 72.73       | 79.73%  | 2                          | 1  | 1   | 45.88%  |
| FOXP1                             | FOXP1                             | TF                 |      | 139-5p, 199-3p      | 49.83       | 82.43%  | 2                          | 1  | 1   | 45.88%  |
| N-CoR                             | NCOR1                             | TF                 | ✓    |                     | 33.33       | 83.78%  | 2                          | 2  | 0   | 45.88%  |
| Cathepsin V                       | CTSL1                             |                    | ✓    |                     | 29.70       | 85.14%  | 2                          | 2  | 0   | 45.88%  |
| c-Src                             | SRC                               |                    |      |                     | 19.17       | 86.49%  | 3                          | 3  | 0   | 23.53%  |
| BAT3                              | BAT3                              |                    | ✓    |                     | 16.67       | 87.84%  | 2                          | 2  | 0   | 45.88%  |
| TAFII28                           | TAF11                             |                    | ✓    |                     | 12.77       | 89.19%  | 2                          | 2  | 0   | 45.88%  |
| ZAP70                             | ZAP70                             |                    |      |                     | 12.33       | 90.54%  | 2                          | 2  | 0   | 45.88%  |
| GMF-gamma                         | GMFG                              |                    | ✓    |                     | 10.67       | 91.89%  | 2                          | 2  | 0   | 45.88%  |
| p300                              | EP300                             | EPIGENES           |      |                     | 7.17        | 93.24%  | 2                          | 2  | 0   | 45.88%  |
| p16INK4                           | CDKN2A                            | TF                 | ✓    |                     | 4.67        | 94.59%  | 3                          | 3  | 0   | 23.53%  |
| SHP-2                             | PTPN11                            |                    |      |                     | 3.83        | 95.95%  | 2                          | 2  | 0   | 45.88%  |
| VEGFR-2                           | KDR                               |                    |      |                     | 2.00        | 97.30%  | 2                          | 2  | 0   | 45.88%  |
| TITF1                             | NKX2-1                            | TF                 |      |                     | 1.00        | 98.65%  | 2                          | 2  | 0   | 45.88%  |
| 14-3-3 sigma                      | SFN                               |                    |      |                     | 0.00        | 100.00% | 1                          | 1  | 0   | 100.00% |
| 14-3-3 zeta/delta                 | YWHAZ                             |                    |      | 199-3p              | 0.00        | 100.00% | 1                          | 1  | 0   | 100.00% |
| A-FABP                            | FABP4                             |                    |      |                     | 0.00        | 100.00% | 1                          | 1  | 0   | 100.00% |
| A1U                               | UBQLN4                            |                    | ✓    |                     | 0.00        | 100.00% | 1                          | 1  | 0   | 100.00% |
| AATC                              | GOT1                              |                    | ✓    |                     | 0.00        | 100.00% | 1                          | 1  | 0   | 100.00% |
| ACACB                             | ACACB                             |                    | ✓    |                     | 0.00        | 100.00% | 1                          | 1  | 0   | 100.00% |
| ACM3                              | CHRM3                             |                    |      |                     | 0.00        | 100.00% | 1                          | 1  | 0   | 100.00% |
| ADNP                              | ADNP                              | TF                 | ✓    |                     | 0.00        | 100.00% | 1                          | 1  | 0   | 100.00% |
| AHR                               | AHR                               | TF                 |      |                     | 0.00        | 100.00% | 1                          | 1  | 0   | 100.00% |
| APEX                              | APEX1                             |                    |      |                     | 0.00        | 100.00% | 1                          | 1  | 0   | 100.00% |
| ARPC4                             | ARPC4                             |                    | ✓    |                     | 0.00        | 100.00% | 1                          | 1  | 0   | 100.00% |
| ASF1A                             | ASF1A                             | EPIGENES           | ✓    | 139-5p              | 0.00        | 100.00% | 1                          | 1  | 0   | 100.00% |
| ATAD2                             | ATAD2                             | EPIGENES           | ✓    |                     | 0.00        | 100.00% | 1                          | 1  | 0   | 100.00% |
| ATF-3                             | ATF3                              | TF                 | ✓    |                     | 0.00        | 100.00% | 1                          | 1  | 0   | 100.00% |
| AXUD1                             | CSRNP1                            | TF                 | ✓    |                     | 0.00        | 100.00% | 1                          | 1  | 0   | 100.00% |
| Adrenomedullin                    | ADM                               |                    |      |                     | 0.00        | 100.00% | 1                          | 1  | 0   | 100.00% |
| BMAL1                             | ARNTL                             | TF                 |      |                     | 0.00        | 100.00% | 1                          | 1  | 0   | 100.00% |
| BMI-1                             | BMI1                              | EPIGENES           | ✓    |                     | 0.00        | 100.00% | 1                          | 1  | 0   | 100.00% |
| BMP4                              | BMP4                              |                    |      |                     | 0.00        | 100.00% | 1                          | 1  | 0   | 100.00% |
| Bax                               | BAX                               |                    |      |                     | 0.00        | 100.00% | 1                          | 1  | 0   | 100.00% |
| Brca1                             | BRCA1                             |                    |      |                     | 0.00        | 100.00% | 1                          | 1  | 0   | 100.00% |
| C/EBP zeta                        | DDIT3                             | TF                 |      |                     | 0.00        | 100.00% | 1                          | 1  | 0   | 100.00% |
| C/EBPalpha                        | CEBPA                             | TF                 |      | 101                 | 0.00        | 100.00% | 1                          | 1  | 0   | 100.00% |
| C/EBPbeta                         | CEBPB                             | TF                 |      |                     | 0.00        | 100.00% | 2                          | 2  | 0   | 45.88%  |
| C/EBPdelta                        | CEBPD                             | TF                 | ✓    |                     | 0.00        | 100.00% | 1                          | 1  | 0   | 100.00% |
| CBF beta                          | CBFB                              | TF                 |      |                     | 0.00        | 100.00% | 1                          | 1  | 0   | 100.00% |

| GeneGO Object Name   | Mapped Gene Symbol   | Molecular Function | DEGs | Predicted Targets † | Betweenness |         | # of Interactions (Degree) |    |     |         |
|----------------------|----------------------|--------------------|------|---------------------|-------------|---------|----------------------------|----|-----|---------|
|                      |                      |                    |      |                     | Value       | Rank*   | Total                      | In | Out | Rank*   |
| CDK1 (p34)           | CDK1                 |                    |      |                     | 0.00        | 100.00% | 1                          | 1  | 0   | 100.00% |
| CDK2                 | CDK2                 |                    |      |                     | 0.00        | 100.00% | 1                          | 1  | 0   | 100.00% |
| CDK4                 | CDK4                 |                    |      |                     | 0.00        | 100.00% | 1                          | 1  | 0   | 100.00% |
| CDYL                 | CDYL                 | EPIGENES           | ✓    | 101                 | 0.00        | 100.00% | 1                          | 1  | 0   | 100.00% |
| CHD7                 | CHD7                 | EPIGENES           | ✓    | 139-5p              | 0.00        | 100.00% | 1                          | 1  | 0   | 100.00% |
| CIITA                | CIITA                | EPIGENES           |      |                     | 0.00        | 100.00% | 1                          | 1  | 0   | 100.00% |
| COUP-TF1             | NR2F1                | TF                 | ✓    |                     | 0.00        | 100.00% | 1                          | 1  | 0   | 100.00% |
| Calpain 1(mu)        | CAPN1                |                    | ✓    |                     | 0.00        | 100.00% | 1                          | 1  | 0   | 100.00% |
| Cathepsin L          | Cathepsin L          |                    |      |                     | 0.00        | 100.00% | 1                          | 1  | 0   | 100.00% |
| CtBP2                | CTBP2                |                    |      |                     | 0.00        | 100.00% | 1                          | 1  | 0   | 100.00% |
| Cyclin E             | CCNE1                |                    |      |                     | 0.00        | 100.00% | 1                          | 1  | 0   | 100.00% |
| Cystatin A           | CSTA                 |                    |      |                     | 0.00        | 100.00% | 1                          | 1  | 0   | 100.00% |
| Cystatin B           | CSTB                 |                    |      |                     | 0.00        | 100.00% | 1                          | 1  | 0   | 100.00% |
| DAPK1                | DAPK1                |                    |      |                     | 0.00        | 100.00% | 1                          | 1  | 0   | 100.00% |
| DAX1                 | NROB1                | TF                 |      |                     | 0.00        | 100.00% | 1                          | 1  | 0   | 100.00% |
| DAXX                 | DAXX                 |                    | ✓    |                     | 0.00        | 100.00% | 1                          | 1  | 0   | 100.00% |
| DJ-1                 | PARK7                |                    |      |                     | 0.00        | 100.00% | 1                          | 1  | 0   | 100.00% |
| DMTF1                | DMTF1                | TF                 |      |                     | 0.00        | 100.00% | 1                          | 1  | 0   | 100.00% |
| DNMT1                | DNMT1                | EPIGENES           |      |                     | 0.00        | 100.00% | 1                          | 1  | 0   | 100.00% |
| E7 protein (HPV16)   | E7 protein (HPV16)   |                    |      |                     | 0.00        | 100.00% | 1                          | 1  | 0   | 100.00% |
| EGF                  | EGF                  |                    |      |                     | 0.00        | 100.00% | 1                          | 1  | 0   | 100.00% |
| ELAVL1 (HuR)         | ELAVL1               |                    |      |                     | 0.00        | 100.00% | 1                          | 1  | 0   | 100.00% |
| ELF1                 | ELF1                 | TF                 |      |                     | 0.00        | 100.00% | 1                          | 1  | 0   | 100.00% |
| ELF3                 | ELF3                 | TF                 |      |                     | 0.00        | 100.00% | 1                          | 1  | 0   | 100.00% |
| ELL2                 | ELL2                 |                    | ✓    | 139-5p              | 0.00        | 100.00% | 1                          | 1  | 0   | 100.00% |
| ERM                  | ETV5                 | TF                 |      | 101                 | 0.00        | 100.00% | 1                          | 1  | 0   | 100.00% |
| ETS2                 | ETS2                 | TF                 |      |                     | 0.00        | 100.00% | 1                          | 1  | 0   | 100.00% |
| EZH2                 | EZH2                 | EPIGENES           | ✓    | 101                 | 0.00        | 100.00% | 1                          | 1  | 0   | 100.00% |
| Endoglin             | ENG                  |                    | ✓    |                     | 0.00        | 100.00% | 2                          | 2  | 0   | 45.88%  |
| Eomesodermin         | EOMES                | TF                 | ✓    |                     | 0.00        | 100.00% | 1                          | 1  | 0   | 100.00% |
| ErbB2                | ERBB2                |                    |      |                     | 0.00        | 100.00% | 1                          | 1  | 0   | 100.00% |
| FAT10                | UBD                  |                    | ✓    |                     | 0.00        | 100.00% | 1                          | 1  | 0   | 100.00% |
| FBXW7                | FBXW7                | EPIGENES           |      |                     | 0.00        | 100.00% | 1                          | 1  | 0   | 100.00% |
| FGL2                 | FGL2                 |                    | ✓    | 199-3p              | 0.00        | 100.00% | 2                          | 2  | 0   | 45.88%  |
| FOXO3A               | FOXO3                | TF                 |      |                     | 0.00        | 100.00% | 1                          | 1  | 0   | 100.00% |
| FOXP3                | FOXP3                | TF                 |      |                     | 0.00        | 100.00% | 1                          | 1  | 0   | 100.00% |
| FasL(TNFSF6)         | FASLG                |                    |      |                     | 0.00        | 100.00% | 1                          | 1  | 0   | 100.00% |
| FasR(CD95)           | FAS                  |                    |      |                     | 0.00        | 100.00% | 1                          | 1  | 0   | 100.00% |
| G-CSF                | CSF3                 |                    |      |                     | 0.00        | 100.00% | 1                          | 1  | 0   | 100.00% |
| G-protein alpha-q/11 | G-protein alpha-q/11 |                    |      |                     | 0.00        | 100.00% | 1                          | 1  | 0   | 100.00% |
| GAB1                 | GAB1                 |                    |      |                     | 0.00        | 100.00% | 1                          | 1  | 0   | 100.00% |
| GABP alpha           | GABPA                | TF                 |      |                     | 0.00        | 100.00% | 1                          | 1  | 0   | 100.00% |
| GATA-4               | GATA4                | TF                 |      |                     | 0.00        | 100.00% | 1                          | 1  | 0   | 100.00% |
| GC1QBP               | C1QBP                |                    |      |                     | 0.00        | 100.00% | 1                          | 1  | 0   | 100.00% |
| GFER                 | GFER                 |                    |      |                     | 0.00        | 100.00% | 1                          | 1  | 0   | 100.00% |
| GRB2                 | GRB2                 |                    |      |                     | 0.00        | 100.00% | 1                          | 1  | 0   | 100.00% |
| GSK3 alpha           | GSK3A                |                    |      |                     | 0.00        | 100.00% | 1                          | 1  | 0   | 100.00% |
| GSK3 beta            | GSK3B                |                    |      |                     | 0.00        | 100.00% | 1                          | 1  | 0   | 100.00% |
| Galectin-3           | LGALS3               |                    |      |                     | 0.00        | 100.00% | 1                          | 1  | 0   | 100.00% |
| Golgin-45 (BLZF1)    | BLZF1                | TF                 | ✓    |                     | 0.00        | 100.00% | 1                          | 1  | 0   | 100.00% |
| Granzyme B           | GZMB                 |                    |      |                     | 0.00        | 100.00% | 1                          | 1  | 0   | 100.00% |
| H-Ras                | HRAS                 |                    |      |                     | 0.00        | 100.00% | 1                          | 1  | 0   | 100.00% |
| HB-EGF               | HBEGF                |                    |      |                     | 0.00        | 100.00% | 1                          | 1  | 0   | 100.00% |
| HIF1A                | HIF1A                | TF                 |      |                     | 0.00        | 100.00% | 1                          | 1  | 0   | 100.00% |
| HMG1/Y               | HMGA1                | EPIGENES           |      |                     | 0.00        | 100.00% | 1                          | 1  | 0   | 100.00% |
| HNF1-alpha           | HNF1A                | TF                 |      |                     | 0.00        | 100.00% | 1                          | 1  | 0   | 100.00% |
| HNF3-beta            | FOXA2                | TF                 |      |                     | 0.00        | 100.00% | 1                          | 1  | 0   | 100.00% |
| HNF4-alpha           | HNF4A                | TF                 |      |                     | 0.00        | 100.00% | 1                          | 1  | 0   | 100.00% |
| HSF1                 | HSF1                 | TF                 |      |                     | 0.00        | 100.00% | 1                          | 1  | 0   | 100.00% |
| HSP27                | HSPB1                |                    |      |                     | 0.00        | 100.00% | 1                          | 1  | 0   | 100.00% |
| I-kB                 | I-kB                 |                    |      |                     | 0.00        | 100.00% | 1                          | 1  | 0   | 100.00% |
| ID1                  | ID1                  |                    |      |                     | 0.00        | 100.00% | 1                          | 1  | 0   | 100.00% |
| IL-1 beta            | IL1B                 |                    |      |                     | 0.00        | 100.00% | 1                          | 1  | 0   | 100.00% |
| IL-12                | IL-12                |                    |      |                     | 0.00        | 100.00% | 1                          | 1  | 0   | 100.00% |
| IL-18                | IL18                 |                    |      |                     | 0.00        | 100.00% | 1                          | 1  | 0   | 100.00% |
| IL-2                 | IL2                  |                    |      |                     | 0.00        | 100.00% | 1                          | 1  | 0   | 100.00% |
| IL-4                 | IL4                  |                    |      |                     | 0.00        | 100.00% | 1                          | 1  | 0   | 100.00% |
| IL-5                 | IL5                  |                    |      |                     | 0.00        | 100.00% | 1                          | 1  | 0   | 100.00% |
| IL-9                 | IL9                  |                    |      |                     | 0.00        | 100.00% | 1                          | 1  | 0   | 100.00% |
| IRF4                 | IRF4                 | TF                 |      |                     | 0.00        | 100.00% | 1                          | 1  | 0   | 100.00% |
| Irf202a              | Irf202a              |                    |      |                     | 0.00        | 100.00% | 1                          | 1  | 0   | 100.00% |
| JAK2                 | JAK2                 |                    |      | 101                 | 0.00        | 100.00% | 1                          | 1  | 0   | 100.00% |
| JDP2                 | JDP2                 | TF                 | ✓    | 101                 | 0.00        | 100.00% | 1                          | 1  | 0   | 100.00% |
| JMJD2A               | KDM4A                | EPIGENES           |      |                     | 0.00        | 100.00% | 1                          | 1  | 0   | 100.00% |
| JNK(MAPK8-10)        | JNK(MAPK8-10)        |                    |      |                     | 0.00        | 100.00% | 1                          | 1  | 0   | 100.00% |
| KLF6                 | KLF6                 | TF                 | ✓    |                     | 0.00        | 100.00% | 2                          | 2  | 0   | 45.88%  |
| KNG                  | KNG1                 |                    |      |                     | 0.00        | 100.00% | 1                          | 1  | 0   | 100.00% |
| LCKBP1               | HCLS1                | TF                 | ✓    |                     | 0.00        | 100.00% | 1                          | 1  | 0   | 100.00% |
| LL37                 | CAMP                 |                    |      |                     | 0.00        | 100.00% | 1                          | 1  | 0   | 100.00% |
| Leptin               | LEP                  |                    |      |                     | 0.00        | 100.00% | 1                          | 1  | 0   | 100.00% |
| MAFG                 | MAFG                 | TF                 | ✓    |                     | 0.00        | 100.00% | 1                          | 1  | 0   | 100.00% |
| MAP3K3               | MAP3K3               |                    |      |                     | 0.00        | 100.00% | 1                          | 1  | 0   | 100.00% |
| MAPKAPK5             | MAPKAPK5             |                    | ✓    |                     | 0.00        | 100.00% | 1                          | 1  | 0   | 100.00% |
| MCM2                 | MCM2                 |                    | ✓    |                     | 0.00        | 100.00% | 1                          | 1  | 0   | 100.00% |
| MCM3                 | MCM3                 |                    | ✓    |                     | 0.00        | 100.00% | 1                          | 1  | 0   | 100.00% |
| MDM2                 | MDM2                 |                    |      |                     | 0.00        | 100.00% | 1                          | 1  | 0   | 100.00% |
| MED8                 | MED8                 |                    | ✓    | 139-5p              | 0.00        | 100.00% | 1                          | 1  | 0   | 100.00% |
| MEK4(MAP2K4)         | MAP2K4               |                    |      |                     | 0.00        | 100.00% | 1                          | 1  | 0   | 100.00% |
| MITF                 | MITF                 | TF                 |      | 101                 | 0.00        | 100.00% | 1                          | 1  | 0   | 100.00% |
| MJD (ataxin-3)       | ATXN3                |                    |      |                     | 0.00        | 100.00% | 1                          | 1  | 0   | 100.00% |
| MKK7 (MAP2K7)        | MAP2K7               |                    |      |                     | 0.00        | 100.00% | 1                          | 1  | 0   | 100.00% |
| MMP-12               | MMP12                |                    |      |                     | 0.00        | 100.00% | 1                          | 1  | 0   | 100.00% |
| MMP-14               | MMP14                |                    | ✓    |                     | 0.00        | 100.00% | 1                          | 1  | 0   | 100.00% |
| MMP-9                | MMP9                 |                    |      |                     | 0.00        | 100.00% | 1                          | 1  | 0   | 100.00% |
| MSH6                 | MSH6                 |                    |      |                     | 0.00        | 100.00% | 1                          | 1  | 0   | 100.00% |
| MSX1                 | MSX1                 | TF                 |      | 101                 | 0.00        | 100.00% | 1                          | 1  | 0   | 100.00% |
| MYF5                 | MYF5                 | TF                 |      |                     | 0.00        | 100.00% | 1                          | 1  | 0   | 100.00% |
| MYF6                 | MYF6                 | TF                 |      |                     | 0.00        | 100.00% | 1                          | 1  | 0   | 100.00% |
| MYOD                 | MYOD1                | TF                 |      |                     | 0.00        | 100.00% | 1                          | 1  | 0   | 100.00% |
| MYOG                 | MYOG                 | TF                 |      |                     | 0.00        | 100.00% | 1                          | 1  | 0   | 100.00% |

| GeneGO Object Name        | Mapped Gene Symbol       | Molecular Function | DEGs | Predicted Targets † | Betweenness |         | # of Interactions (Degree) |    |     |         |
|---------------------------|--------------------------|--------------------|------|---------------------|-------------|---------|----------------------------|----|-----|---------|
|                           |                          |                    |      |                     | Value       | Rank*   | Total                      | In | Out | Rank*   |
| Mi-2 alpha                | CHD3                     | EPIGENES           |      |                     | 0.00        | 100.00% | 1                          | 1  | 0   | 100.00% |
| NANOG                     | NANOG                    | TF                 |      |                     | 0.00        | 100.00% | 1                          | 1  | 0   | 100.00% |
| NEIL1                     | NEIL1                    |                    |      |                     | 0.00        | 100.00% | 1                          | 1  | 0   | 100.00% |
| NEURL1                    | NEURL                    |                    |      |                     | 0.00        | 100.00% | 1                          | 1  | 0   | 100.00% |
| NF-kB                     | RELA                     | TF                 |      |                     | 0.00        | 100.00% | 1                          | 1  | 0   | 100.00% |
| ODP2                      | DLAT                     |                    | ✓    |                     | 0.00        | 100.00% | 1                          | 1  | 0   | 100.00% |
| Oct-3/4                   | POU5F1                   | TF                 |      |                     | 0.00        | 100.00% | 1                          | 1  | 0   | 100.00% |
| P4HA1                     | P4HA1                    |                    | ✓    |                     | 0.00        | 100.00% | 1                          | 1  | 0   | 100.00% |
| PACAP                     | ADCYAP1                  |                    |      | 101                 | 0.00        | 100.00% | 1                          | 1  | 0   | 100.00% |
| PACE4                     | PCSK6                    |                    |      |                     | 0.00        | 100.00% | 1                          | 1  | 0   | 100.00% |
| PC4                       | SUB1                     |                    | ✓    | 101                 | 0.00        | 100.00% | 1                          | 1  | 0   | 100.00% |
| PCNA                      | PCNA                     |                    |      |                     | 0.00        | 100.00% | 1                          | 1  | 0   | 100.00% |
| PCYT2                     | PCYT2                    |                    | ✓    |                     | 0.00        | 100.00% | 1                          | 1  | 0   | 100.00% |
| PDGF-A                    | PDGFA                    |                    |      |                     | 0.00        | 100.00% | 1                          | 1  | 0   | 100.00% |
| PELP1                     | PELP1                    |                    |      |                     | 0.00        | 100.00% | 1                          | 1  | 0   | 100.00% |
| PIAS4                     | PIAS4                    |                    |      |                     | 0.00        | 100.00% | 1                          | 1  | 0   | 100.00% |
| PIT1                      | POU1F1                   | TF                 |      |                     | 0.00        | 100.00% | 2                          | 2  | 0   | 45.88%  |
| PKC-delta                 | PRKCD                    |                    |      |                     | 0.00        | 100.00% | 1                          | 1  | 0   | 100.00% |
| PLAU (UPA)                | PLAU                     |                    |      |                     | 0.00        | 100.00% | 1                          | 1  | 0   | 100.00% |
| POLA1                     | POLA1                    |                    | ✓    |                     | 0.00        | 100.00% | 1                          | 1  | 0   | 100.00% |
| POU3F2 (BRN2)             | POU3F2                   | TF                 |      |                     | 0.00        | 100.00% | 1                          | 1  | 0   | 100.00% |
| PRNP                      | PRNP                     |                    | ✓    |                     | 0.00        | 100.00% | 1                          | 1  | 0   | 100.00% |
| PSF                       | SFPQ                     |                    |      | 101                 | 0.00        | 100.00% | 1                          | 1  | 0   | 100.00% |
| PU.1                      | SP1                      | TF                 |      |                     | 0.00        | 100.00% | 1                          | 1  | 0   | 100.00% |
| Pinin                     | PNN                      |                    | ✓    | 139-5p              | 0.00        | 100.00% | 1                          | 1  | 0   | 100.00% |
| Progesterone receptor     | PGR                      | TF                 |      |                     | 0.00        | 100.00% | 1                          | 1  | 0   | 100.00% |
| Prolactin                 | PRL                      |                    |      |                     | 0.00        | 100.00% | 1                          | 1  | 0   | 100.00% |
| RBB2                      | KDM5A                    | EPIGENES           | ✓    |                     | 0.00        | 100.00% | 1                          | 1  | 0   | 100.00% |
| Rap1GAP1                  | RAP1GAP                  |                    |      |                     | 0.00        | 100.00% | 1                          | 1  | 0   | 100.00% |
| Raptor                    | RPTOR                    |                    |      |                     | 0.00        | 100.00% | 1                          | 1  | 0   | 100.00% |
| Rb protein                | RB1                      | TF                 |      | 199-3p              | 0.00        | 100.00% | 1                          | 1  | 0   | 100.00% |
| S100A7                    | S100A7                   |                    |      |                     | 0.00        | 100.00% | 1                          | 1  | 0   | 100.00% |
| SAT-1                     | SLC26A1                  |                    |      |                     | 0.00        | 100.00% | 1                          | 1  | 0   | 100.00% |
| SHP-1                     | PTPN6                    |                    |      |                     | 0.00        | 100.00% | 1                          | 1  | 0   | 100.00% |
| SMAD7                     | SMAD7                    | TF                 |      |                     | 0.00        | 100.00% | 1                          | 1  | 0   | 100.00% |
| SNAIL1                    | SNAIL1                   |                    |      |                     | 0.00        | 100.00% | 1                          | 1  | 0   | 100.00% |
| SOS                       | SOS                      |                    |      |                     | 0.00        | 100.00% | 1                          | 1  | 0   | 100.00% |
| SP1/SP3 complex           | SP1                      | TF                 |      | 199-3p              | 0.00        | 100.00% | 2                          | 2  | 0   | 45.88%  |
| SRF                       | SRF                      | TF                 |      |                     | 0.00        | 100.00% | 1                          | 1  | 0   | 100.00% |
| SSAT                      | SAT1                     |                    | ✓    |                     | 0.00        | 100.00% | 1                          | 1  | 0   | 100.00% |
| STAT4                     | STAT4                    | TF                 |      |                     | 0.00        | 100.00% | 1                          | 1  | 0   | 100.00% |
| Sequestosome 1(p62)       | SQSTM1                   |                    | ✓    |                     | 0.00        | 100.00% | 2                          | 2  | 0   | 45.88%  |
| Sirtuin7                  | SIRT7                    |                    | ✓    |                     | 0.00        | 100.00% | 1                          | 1  | 0   | 100.00% |
| Ski                       | SKI                      |                    |      |                     | 0.00        | 100.00% | 1                          | 1  | 0   | 100.00% |
| Sortilin                  | SORT1                    |                    | ✓    |                     | 0.00        | 100.00% | 1                          | 1  | 0   | 100.00% |
| Sry                       | SRY                      | TF                 |      |                     | 0.00        | 100.00% | 1                          | 1  | 0   | 100.00% |
| TAFI48                    | TAF1A                    |                    | ✓    |                     | 0.00        | 100.00% | 1                          | 1  | 0   | 100.00% |
| TfIIIE, alpha subunit     | GTF2E1                   |                    | ✓    | 101                 | 0.00        | 100.00% | 1                          | 1  | 0   | 100.00% |
| TGF-beta receptor type II | TGFBR2                   |                    |      |                     | 0.00        | 100.00% | 2                          | 2  | 0   | 45.88%  |
| TIMP1                     | TIMP1                    |                    |      |                     | 0.00        | 100.00% | 1                          | 1  | 0   | 100.00% |
| TIMP2                     | TIMP2                    |                    |      |                     | 0.00        | 100.00% | 1                          | 1  | 0   | 100.00% |
| TIMP4                     | TIMP4                    |                    |      |                     | 0.00        | 100.00% | 1                          | 1  | 0   | 100.00% |
| TIP30                     | HTATIP2                  |                    | ✓    |                     | 0.00        | 100.00% | 1                          | 1  | 0   | 100.00% |
| TNF-alpha                 | TNF                      |                    |      |                     | 0.00        | 100.00% | 1                          | 1  | 0   | 100.00% |
| TOP1                      | TOP1                     |                    |      | 139-5p              | 0.00        | 100.00% | 2                          | 1  | 1   | 45.88%  |
| TTF1                      | TTF1                     |                    | ✓    |                     | 0.00        | 100.00% | 1                          | 1  | 0   | 100.00% |
| TWIST1                    | TWIST1                   |                    |      |                     | 0.00        | 100.00% | 1                          | 1  | 0   | 100.00% |
| Tcf(Lef)                  | LEF1                     | TF                 |      |                     | 0.00        | 100.00% | 2                          | 2  | 0   | 45.88%  |
| Thioredoxin               | TXN                      |                    |      |                     | 0.00        | 100.00% | 1                          | 1  | 0   | 100.00% |
| TrkA                      | NTRK1                    |                    |      |                     | 0.00        | 100.00% | 1                          | 1  | 0   | 100.00% |
| UBF                       | UBTF                     |                    |      |                     | 0.00        | 100.00% | 1                          | 1  | 0   | 100.00% |
| USP31                     | USP31                    |                    | ✓    |                     | 0.00        | 100.00% | 1                          | 1  | 0   | 100.00% |
| Ubiquitin                 | UBB                      |                    |      |                     | 0.00        | 100.00% | 1                          | 1  | 0   | 100.00% |
| VDR                       | VDR                      | TF                 |      |                     | 0.00        | 100.00% | 1                          | 1  | 0   | 100.00% |
| VEGF-A                    | VEGFA                    |                    |      |                     | 0.00        | 100.00% | 1                          | 1  | 0   | 100.00% |
| VEGFR-3                   | FLT4                     |                    |      |                     | 0.00        | 100.00% | 1                          | 1  | 0   | 100.00% |
| Versican                  | VCAN                     |                    |      |                     | 0.00        | 100.00% | 1                          | 1  | 0   | 100.00% |
| WNT5A                     | WNT5A                    |                    |      |                     | 0.00        | 100.00% | 1                          | 1  | 0   | 100.00% |
| XBP1                      | XBP1                     | TF                 |      |                     | 0.00        | 100.00% | 1                          | 1  | 0   | 100.00% |
| YAP1 (YAp65)              | YAP1                     |                    |      | 199-3p              | 0.00        | 100.00% | 1                          | 1  | 0   | 100.00% |
| ZNF160                    | ZNF160                   |                    | ✓    | 139-5p              | 0.00        | 100.00% | 1                          | 1  | 0   | 100.00% |
| ZNF302                    | ZNF302                   |                    | ✓    | 139-5p              | 0.00        | 100.00% | 2                          | 2  | 0   | 45.88%  |
| ZNF331                    | ZNF331                   |                    | ✓    | 139-5p              | 0.00        | 100.00% | 1                          | 1  | 0   | 100.00% |
| alpha-11/beta-1 integrin  | alpha-11/beta-1 integrin |                    |      |                     | 0.00        | 100.00% | 1                          | 1  | 0   | 100.00% |
| alpha-3/beta-1 integrin   | alpha-3/beta-1 integrin  |                    |      |                     | 0.00        | 100.00% | 1                          | 1  | 0   | 100.00% |
| alpha-4/beta-1 integrin   | alpha-4/beta-1 integrin  |                    |      |                     | 0.00        | 100.00% | 1                          | 1  | 0   | 100.00% |
| alpha-5/beta-1 integrin   | alpha-5/beta-1 integrin  |                    |      |                     | 0.00        | 100.00% | 1                          | 1  | 0   | 100.00% |
| c-Abl                     | ABL1                     |                    |      |                     | 0.00        | 100.00% | 1                          | 1  | 0   | 100.00% |
| c-Myb                     | MYB                      |                    |      | 101                 | 0.00        | 100.00% | 1                          | 1  | 0   | 100.00% |
| c-Raf-1                   | RAF1                     |                    |      |                     | 0.00        | 100.00% | 1                          | 1  | 0   | 100.00% |
| mTOR                      | MTOR                     |                    | ✓    |                     | 0.00        | 100.00% | 1                          | 1  | 0   | 100.00% |
| microRNA 155              | miR-155                  |                    |      |                     | 0.00        | 100.00% | 1                          | 1  | 0   | 100.00% |
| microRNA 206              | miR-206                  |                    |      |                     | 0.00        | 100.00% | 1                          | 1  | 0   | 100.00% |
| microRNA 21               | miR-21                   |                    |      |                     | 0.00        | 100.00% | 1                          | 1  | 0   | 100.00% |
| microRNA 221              | miR-221                  |                    |      |                     | 0.00        | 100.00% | 1                          | 1  | 0   | 100.00% |
| microRNA 222              | miR-222                  |                    |      |                     | 0.00        | 100.00% | 1                          | 1  | 0   | 100.00% |
| p14ARF                    | CDKN2A                   | TF                 | ✓    |                     | 0.00        | 100.00% | 1                          | 1  | 0   | 100.00% |
| p27KIP1                   | CDKN1B                   |                    |      |                     | 0.00        | 100.00% | 1                          | 1  | 0   | 100.00% |

\* Rank percentile

† Predicted by TargetScan and context score < -0.2

**Supplementary table S9. Topological properties of miR-199-3p sub-network for cluster C6 network**

| GeneGO Object Name | Mapped Gene Symbol | Molecular Function | DEGs | Predicted Targets † | Betweenness |         | # of Interactions (Degree) |    |     |         |
|--------------------|--------------------|--------------------|------|---------------------|-------------|---------|----------------------------|----|-----|---------|
|                    |                    |                    |      |                     | Value       | Rank*   | Total                      | In | Out | Rank*   |
| miR-199a-3p        | miR-199a-3p        |                    |      |                     | 15340.51    | 3.70%   | 55                         | 13 | 42  | 3.03%   |
| p53                | TP53               | TF                 |      |                     | 6041.00     | 7.41%   | 29                         | 0  | 29  | 6.06%   |
| SUZ12              | SUZ12              | EPIGENES ✓         |      |                     | 5872.51     | 11.11%  | 28                         | 0  | 28  | 9.09%   |
| BMI-1              | BMI1               | EPIGENES ✓         |      |                     | 2602.05     | 14.81%  | 13                         | 0  | 13  | 12.12%  |
| HSF2               | HSF2               | TF ✓               |      |                     | 2295.58     | 18.52%  | 11                         | 0  | 11  | 18.18%  |
| HIF1A              | HIF1A              | TF                 |      |                     | 2015.61     | 22.22%  | 12                         | 1  | 11  | 15.15%  |
| MYOD               | MYOD1              | TF                 |      |                     | 1720.13     | 25.93%  | 10                         | 0  | 10  | 21.21%  |
| EED                | EED                | EPIGENES ✓         |      | 101                 | 1689.18     | 29.63%  | 10                         | 0  | 10  | 21.21%  |
| MYOG               | MYOG               | TF                 |      |                     | 463.45      | 33.33%  | 4                          | 0  | 4   | 27.27%  |
| C/EBPdelta         | CEBPD              | TF                 |      |                     | 392.59      | 37.04%  | 2                          | 2  | 0   | 39.39%  |
| EZH2               | EZH2               | EPIGENES ✓         |      | 101                 | 392.59      | 37.04%  | 2                          | 2  | 0   | 39.39%  |
| ATF-6 alpha        | ATF6               | TF                 |      |                     | 280.00      | 44.44%  | 2                          | 0  | 2   | 39.39%  |
| p16INK4            | CDKN2A             | TF ✓               |      |                     | 254.21      | 48.15%  | 3                          | 3  | 0   | 33.33%  |
| AP-1               | FOS                | TF                 |      | 101, 139-5p, 199-3p | 224.89      | 51.85%  | 4                          | 4  | 0   | 27.27%  |
| ATF-3              | ATF3               | TF ✓               |      |                     | 197.33      | 55.56%  | 2                          | 2  | 0   | 39.39%  |
| ATF-1              | ATF1               | TF                 |      |                     | 189.50      | 59.26%  | 3                          | 0  | 3   | 33.33%  |
| DKK1               | DKK1               |                    |      |                     | 161.44      | 62.96%  | 2                          | 2  | 0   | 39.39%  |
| IGF-1              | IGF-1              |                    |      |                     | 110.42      | 66.67%  | 2                          | 2  | 0   | 39.39%  |
| PRNP               | PRNP               |                    | ✓    |                     | 110.42      | 66.67%  | 2                          | 2  | 0   | 39.39%  |
| GATA-6             | GATA6              | TF                 |      |                     | 101.90      | 74.07%  | 2                          | 2  | 0   | 39.39%  |
| c-Myc              | MYC                | TF                 |      |                     | 101.90      | 74.07%  | 2                          | 2  | 0   | 39.39%  |
| BMP2               | BMP2               |                    |      |                     | 97.50       | 81.48%  | 2                          | 2  | 0   | 39.39%  |
| microRNA 214       | miR-214            |                    |      |                     | 70.17       | 85.19%  | 2                          | 2  | 0   | 39.39%  |
| ACACB              | ACACB              |                    | ✓    |                     | 18.11       | 88.89%  | 2                          | 2  | 0   | 39.39%  |
| EGR1               | EGR1               | TF                 | ✓    |                     | 16.50       | 92.59%  | 2                          | 2  | 0   | 39.39%  |
| SOD2               | SOD2               |                    | ✓    |                     | 16.50       | 92.59%  | 2                          | 2  | 0   | 39.39%  |
| 14-3-3 zeta/delta  | YWHAZ              |                    |      | 199-3p              | 0.00        | 100.00% | 1                          | 1  | 0   | 100.00% |
| AML1 (RUNX1)       | RUNX1              | TF                 |      | 101, 139-5p, 199-3p | 0.00        | 100.00% | 2                          | 2  | 0   | 39.39%  |
| ARHGAP15           | ARHGAP15           |                    | ✓    |                     | 0.00        | 100.00% | 1                          | 1  | 0   | 100.00% |
| ARID4B             | ARID4B             |                    | ✓    | 101, 199-3p         | 0.00        | 100.00% | 1                          | 1  | 0   | 100.00% |
| ASK1 (MAP3K5)      | MAP3K5             |                    |      | 101, 139-5p, 199-3p | 0.00        | 100.00% | 1                          | 1  | 0   | 100.00% |
| BMP7               | BMP7               |                    |      |                     | 0.00        | 100.00% | 1                          | 1  | 0   | 100.00% |
| C14orf169          | C14orf169          |                    | ✓    |                     | 0.00        | 100.00% | 1                          | 1  | 0   | 100.00% |
| CENP-50            | MLF1IP             |                    | ✓    |                     | 0.00        | 100.00% | 1                          | 1  | 0   | 100.00% |
| CITED2             | CITED2             | TF                 |      | 199-3p              | 0.00        | 100.00% | 1                          | 1  | 0   | 100.00% |
| COUP-TF1           | NR2F1              | TF                 | ✓    |                     | 0.00        | 100.00% | 1                          | 1  | 0   | 100.00% |
| Cathepsin L        | Cathepsin L        |                    |      |                     | 0.00        | 100.00% | 1                          | 1  | 0   | 100.00% |
| Collagen IV        | Collagen IV        |                    |      |                     | 0.00        | 100.00% | 1                          | 1  | 0   | 100.00% |
| Cyclin D1          | CCND1              |                    |      |                     | 0.00        | 100.00% | 1                          | 1  | 0   | 100.00% |
| DNMT1              | DNMT1              | EPIGENES           |      |                     | 0.00        | 100.00% | 1                          | 1  | 0   | 100.00% |
| DNMT3A             | DNMT3A             | EPIGENES           |      | 101, 199-3p         | 0.00        | 100.00% | 2                          | 2  | 0   | 39.39%  |
| DNMT3B             | DNMT3B             | EPIGENES           |      |                     | 0.00        | 100.00% | 1                          | 1  | 0   | 100.00% |
| E4F1               | E4F1               | TF                 | ✓    |                     | 0.00        | 100.00% | 1                          | 1  | 0   | 100.00% |
| EGLN1              | EGLN1              |                    | ✓    |                     | 0.00        | 100.00% | 1                          | 1  | 0   | 100.00% |
| EPAS1              | EPAS1              | TF                 |      | 199-3p              | 0.00        | 100.00% | 1                          | 1  | 0   | 100.00% |
| ESR1 (nuclear)     | ESR1               | TF                 |      |                     | 0.00        | 100.00% | 1                          | 1  | 0   | 100.00% |
| Eomesodermin       | EOMES              | TF                 | ✓    |                     | 0.00        | 100.00% | 1                          | 1  | 0   | 100.00% |
| Ep-CAM             | EPCAM              |                    |      |                     | 0.00        | 100.00% | 1                          | 1  | 0   | 100.00% |
| FAT10              | UBD                |                    | ✓    |                     | 0.00        | 100.00% | 1                          | 1  | 0   | 100.00% |
| FGL2               | FGL2               |                    | ✓    | 199-3p              | 0.00        | 100.00% | 1                          | 1  | 0   | 100.00% |
| FHL2               | FHL2               |                    | ✓    |                     | 0.00        | 100.00% | 1                          | 1  | 0   | 100.00% |
| FOXF1              | FOXF1              | TF                 |      |                     | 0.00        | 100.00% | 1                          | 1  | 0   | 100.00% |
| FOXP1              | FOXP1              | TF                 |      | 139-5p, 199-3p      | 0.00        | 100.00% | 1                          | 1  | 0   | 100.00% |
| FTLHSDC1           | MTHFD1L            |                    | ✓    |                     | 0.00        | 100.00% | 1                          | 1  | 0   | 100.00% |
| Fibronectin        | FN1                |                    |      | 101, 199-3p         | 0.00        | 100.00% | 1                          | 1  | 0   | 100.00% |
| G-CSF              | CSF3               |                    |      |                     | 0.00        | 100.00% | 1                          | 1  | 0   | 100.00% |
| GATA-1             | GATA1              | TF                 |      |                     | 0.00        | 100.00% | 1                          | 1  | 0   | 100.00% |
| GATA-3             | GATA3              | TF                 |      |                     | 0.00        | 100.00% | 1                          | 1  | 0   | 100.00% |
| GBL                | MLST8              |                    |      |                     | 0.00        | 100.00% | 1                          | 1  | 0   | 100.00% |
| GPI                | GPI                |                    |      |                     | 0.00        | 100.00% | 1                          | 1  | 0   | 100.00% |
| HGFA               | HGFAC              |                    | ✓    |                     | 0.00        | 100.00% | 1                          | 1  | 0   | 100.00% |
| HOXC6              | HOXC6              | TF                 |      |                     | 0.00        | 100.00% | 1                          | 1  | 0   | 100.00% |
| HSF1               | HSF1               | TF                 |      |                     | 0.00        | 100.00% | 1                          | 1  | 0   | 100.00% |
| HSP27              | HSPB1              |                    |      |                     | 0.00        | 100.00% | 1                          | 1  | 0   | 100.00% |
| HSP90              | HSP90              |                    |      |                     | 0.00        | 100.00% | 1                          | 1  | 0   | 100.00% |
| Hamartin           | TSC1               |                    |      |                     | 0.00        | 100.00% | 1                          | 1  | 0   | 100.00% |
| HoxC13             | HOXC13             | TF                 |      |                     | 0.00        | 100.00% | 1                          | 1  | 0   | 100.00% |
| IBP2               | IGFBP2             |                    |      |                     | 0.00        | 100.00% | 1                          | 1  | 0   | 100.00% |
| IBP3               | IGFBP3             |                    |      |                     | 0.00        | 100.00% | 1                          | 1  | 0   | 100.00% |
| IL-22              | IL22               |                    |      |                     | 0.00        | 100.00% | 1                          | 1  | 0   | 100.00% |
| IL-4               | IL4                |                    |      |                     | 0.00        | 100.00% | 1                          | 1  | 0   | 100.00% |
| IL-4R type II      | IL-4R type II      |                    |      |                     | 0.00        | 100.00% | 1                          | 1  | 0   | 100.00% |
| KLF13              | KLF13              |                    | ✓    | 199-3p              | 0.00        | 100.00% | 1                          | 1  | 0   | 100.00% |
| LIN-28B            | LIN28B             |                    | ✓    | 101, 199-3p         | 0.00        | 100.00% | 1                          | 1  | 0   | 100.00% |
| MCM4/6/7 complex   | MCM4/6/7 complex   |                    |      |                     | 0.00        | 100.00% | 1                          | 1  | 0   | 100.00% |
| MNK2(GPRK7)        | MKNK2              |                    | ✓    |                     | 0.00        | 100.00% | 1                          | 1  | 0   | 100.00% |
| MTAP               | MTAP               |                    | ✓    |                     | 0.00        | 100.00% | 1                          | 1  | 0   | 100.00% |
| NANOG              | NANOG              | TF                 |      |                     | 0.00        | 100.00% | 1                          | 1  | 0   | 100.00% |
| NEUR1              | NEU1               |                    | ✓    |                     | 0.00        | 100.00% | 1                          | 1  | 0   | 100.00% |
| NEURL1             | NEURL              |                    |      |                     | 0.00        | 100.00% | 1                          | 1  | 0   | 100.00% |
| NF-Y               | NF-Y               |                    |      |                     | 0.00        | 100.00% | 1                          | 1  | 0   | 100.00% |
| NIPP-1             | PPP1R8             |                    |      |                     | 0.00        | 100.00% | 1                          | 1  | 0   | 100.00% |
| NLK                | NLK                |                    | ✓    | 101, 199-3p         | 0.00        | 100.00% | 1                          | 1  | 0   | 100.00% |
| Oct-3/4            | POU5F1             | TF                 |      |                     | 0.00        | 100.00% | 1                          | 1  | 0   | 100.00% |
| P4HA1              | P4HA1              |                    | ✓    |                     | 0.00        | 100.00% | 1                          | 1  | 0   | 100.00% |
| PAX3               | PAX3               | TF                 |      |                     | 0.00        | 100.00% | 1                          | 1  | 0   | 100.00% |
| PC4                | SUB1               |                    | ✓    | 101                 | 0.00        | 100.00% | 1                          | 1  | 0   | 100.00% |
| PCY2               | PCYT2              |                    | ✓    |                     | 0.00        | 100.00% | 1                          | 1  | 0   | 100.00% |
| PDE4B              | PDE4B              |                    | ✓    | 199-3p              | 0.00        | 100.00% | 1                          | 1  | 0   | 100.00% |
| PDGF-R-alpha       | PDGFRA             |                    |      | 199-3p              | 0.00        | 100.00% | 1                          | 1  | 0   | 100.00% |
| PKC-lambda/iota    | PRKCI              |                    |      | 199-3p              | 0.00        | 100.00% | 1                          | 1  | 0   | 100.00% |
| PLAU (UPA)         | PLAU               |                    |      |                     | 0.00        | 100.00% | 1                          | 1  | 0   | 100.00% |
| PLK3 (CNK)         | PLK3               |                    | ✓    |                     | 0.00        | 100.00% | 1                          | 1  | 0   | 100.00% |
| PNRC1              | PNRC1              |                    | ✓    | 101, 199-3p         | 0.00        | 100.00% | 2                          | 2  | 0   | 39.39%  |

| GeneGO Object Name      | Mapped Gene Symbol      | Molecular Function | DEGs | Predicted Targets † | Betweenness |         | # of Interactions (Degree) |    |     |         |
|-------------------------|-------------------------|--------------------|------|---------------------|-------------|---------|----------------------------|----|-----|---------|
|                         |                         |                    |      |                     | Value       | Rank*   | Total                      | In | Out | Rank*   |
| PP2A catalytic          | PP2A catalytic          |                    |      |                     | 0.00        | 100.00% | 1                          | 1  | 0   | 100.00% |
| PTEN                    | PTEN                    |                    |      | 139-5p              | 0.00        | 100.00% | 1                          | 1  | 0   | 100.00% |
| Progesterone receptor   | PGR                     | TF                 |      |                     | 0.00        | 100.00% | 1                          | 1  | 0   | 100.00% |
| Protein kinase G1 alpha | PRKG1                   |                    |      |                     | 0.00        | 100.00% | 1                          | 1  | 0   | 100.00% |
| QKI                     | QKI                     |                    | ✓    | 101, 199-3p         | 0.00        | 100.00% | 1                          | 1  | 0   | 100.00% |
| RBMS1                   | RBMS1                   |                    |      |                     | 0.00        | 100.00% | 1                          | 1  | 0   | 100.00% |
| RENT2                   | UPF2                    |                    | ✓    | 199-3p              | 0.00        | 100.00% | 1                          | 1  | 0   | 100.00% |
| RIP140                  | NRIP1                   |                    |      | 199-3p              | 0.00        | 100.00% | 1                          | 1  | 0   | 100.00% |
| RNA polymerase II       | RNA polymerase II       |                    |      |                     | 0.00        | 100.00% | 1                          | 1  | 0   | 100.00% |
| Rb protein              | RB1                     | TF                 |      | 199-3p              | 0.00        | 100.00% | 2                          | 2  | 0   | 39.39%  |
| SAT-1                   | SLC26A1                 |                    |      |                     | 0.00        | 100.00% | 1                          | 1  | 0   | 100.00% |
| SDF-1                   | CXCL12                  |                    |      |                     | 0.00        | 100.00% | 1                          | 1  | 0   | 100.00% |
| SLC38A1                 | SLC38A1                 |                    |      | 199-3p              | 0.00        | 100.00% | 1                          | 1  | 0   | 100.00% |
| SMAD5                   | SMAD5                   | TF                 | ✓    |                     | 0.00        | 100.00% | 1                          | 1  | 0   | 100.00% |
| SMAD9 (SMAD8)           | SMAD9                   | TF                 | ✓    |                     | 0.00        | 100.00% | 1                          | 1  | 0   | 100.00% |
| SOX15                   | SOX15                   | TF                 |      |                     | 0.00        | 100.00% | 1                          | 1  | 0   | 100.00% |
| SP1/SP3 complex         | SP1                     | TF                 |      | 199-3p              | 0.00        | 100.00% | 1                          | 1  | 0   | 100.00% |
| SR140                   | SR140                   |                    | ✓    | 199-3p              | 0.00        | 100.00% | 1                          | 1  | 0   | 100.00% |
| SULF2                   | SULF2                   |                    | ✓    |                     | 0.00        | 100.00% | 1                          | 1  | 0   | 100.00% |
| SUMO-3                  | SUMO3                   |                    | ✓    | 101, 199-3p         | 0.00        | 100.00% | 1                          | 1  | 0   | 100.00% |
| Sequestosome 1(p62)     | SQSTM1                  |                    | ✓    |                     | 0.00        | 100.00% | 1                          | 1  | 0   | 100.00% |
| Sirtuin1                | SIRT1                   | EPIGENES           |      |                     | 0.00        | 100.00% | 1                          | 1  | 0   | 100.00% |
| Staf-50                 | TRIM22                  | TF                 | ✓    |                     | 0.00        | 100.00% | 1                          | 1  | 0   | 100.00% |
| TAF148                  | TAF1A                   |                    | ✓    |                     | 0.00        | 100.00% | 1                          | 1  | 0   | 100.00% |
| TBP                     | TBP                     | TF                 |      |                     | 0.00        | 100.00% | 1                          | 0  | 1   | 100.00% |
| TCP1                    | TCP1                    |                    |      |                     | 0.00        | 100.00% | 1                          | 1  | 0   | 100.00% |
| TFIIH                   | TFIIH                   |                    |      |                     | 0.00        | 100.00% | 1                          | 1  | 0   | 100.00% |
| TGF-beta 1              | TGFB1                   |                    |      | 139-5p              | 0.00        | 100.00% | 1                          | 1  | 0   | 100.00% |
| TIF1-alpha              | TRIM24                  | EPIGENES           | ✓    | 101, 139-5p         | 0.00        | 100.00% | 1                          | 1  | 0   | 100.00% |
| TWIST1                  | TWIST1                  |                    |      |                     | 0.00        | 100.00% | 1                          | 0  | 1   | 100.00% |
| Tcf(Lef)                | LEF1                    | TF                 |      |                     | 0.00        | 100.00% | 1                          | 1  | 0   | 100.00% |
| USP25                   | USP25                   |                    | ✓    | 199-3p              | 0.00        | 100.00% | 1                          | 1  | 0   | 100.00% |
| Ubiquitin               | UBB                     |                    |      |                     | 0.00        | 100.00% | 1                          | 1  | 0   | 100.00% |
| Versican                | VCAN                    |                    |      |                     | 0.00        | 100.00% | 2                          | 1  | 1   | 39.39%  |
| WNT3A                   | WNT3A                   |                    |      |                     | 0.00        | 100.00% | 1                          | 1  | 0   | 100.00% |
| WNT5A                   | WNT5A                   |                    |      |                     | 0.00        | 100.00% | 1                          | 1  | 0   | 100.00% |
| YAP1 (YAp65)            | YAP1                    |                    |      | 199-3p              | 0.00        | 100.00% | 1                          | 1  | 0   | 100.00% |
| YY1                     | YY1                     | TF                 |      |                     | 0.00        | 100.00% | 1                          | 1  | 0   | 100.00% |
| ZNF189                  | ZNF189                  | TF                 | ✓    |                     | 0.00        | 100.00% | 1                          | 1  | 0   | 100.00% |
| ZNF217                  | ZNF217                  | TF                 |      | 101, 199-3p         | 0.00        | 100.00% | 2                          | 2  | 0   | 39.39%  |
| ZNRF2                   | ZNRF2                   |                    | ✓    | 101, 199-3p         | 0.00        | 100.00% | 1                          | 1  | 0   | 100.00% |
| alpha-3/beta-1 integrin | alpha-3/beta-1 integrin |                    |      |                     | 0.00        | 100.00% | 1                          | 1  | 0   | 100.00% |
| beta-TrCP               | BTRC                    |                    |      | 199-3p              | 0.00        | 100.00% | 1                          | 1  | 0   | 100.00% |
| c-MPL                   | MPL                     |                    |      | 199-3p              | 0.00        | 100.00% | 1                          | 1  | 0   | 100.00% |
| dUTPase (DUT)           | DUT                     |                    | ✓    |                     | 0.00        | 100.00% | 1                          | 1  | 0   | 100.00% |
| p14ARF                  | CDKN2A                  | TF                 | ✓    |                     | 0.00        | 100.00% | 1                          | 1  | 0   | 100.00% |
| p15                     | CDKN2B                  |                    |      |                     | 0.00        | 100.00% | 1                          | 1  | 0   | 100.00% |
| p21                     | CDKN1A                  |                    |      |                     | 0.00        | 100.00% | 1                          | 1  | 0   | 100.00% |

\* Rank percentile

† Predicted by TargetScan and context score < -0.2

Supplementary Table S10. Experimentally validated targets of AP1

| 1st neighbor     | Mechanism                     | Effect      | 2nd neighbor            | Object Type             | Mapped gene symbol      | Experimental type        | Reference               |            |
|------------------|-------------------------------|-------------|-------------------------|-------------------------|-------------------------|--------------------------|-------------------------|------------|
| AP-1             | Transcription regulation      | Activation  | ATF-3                   | Transcription factor    | ATF3                    | ChIP                     | (1)                     |            |
|                  |                               |             | Beta-catenin            | Generic binding protein | CTNBB1                  | EMSA                     | (2)                     |            |
|                  |                               |             | C/EBP zeta              | Transcription factor    | DDIT3                   | CAT, SEQ                 | (3-5)                   |            |
|                  |                               |             | Cathepsin L             | Generic protease        | Cathepsin L             | SEQ                      | (6-8)                   |            |
|                  |                               |             | CIITA                   | Generic binding protein | CIITA                   | SEQ                      | (9)                     |            |
|                  |                               |             | Cyclin D1               | Generic binding protein | CCND1                   | EMSA                     | (10-14)                 |            |
|                  |                               |             | DMTF1                   | Transcription factor    | DMTF1                   | TAS                      | (15, 16)                |            |
|                  |                               |             | E7 protein (HPV16)      | Protein                 | E7 protein (HPV16)      | EMSA                     | (17, 18)                |            |
|                  |                               |             | EGR1                    | Transcription factor    | EGR1                    | ChIP                     | (19)                    |            |
|                  |                               |             | ELAVL1 (HuR)            | Generic binding protein | ELAVL1                  | SEQ                      | (20)                    |            |
|                  |                               |             | ELF1                    | Transcription factor    | ELF1                    | EMSA                     | (21)                    |            |
|                  |                               |             | ERR1                    | Transcription factor    | ESRRA                   | ChIP                     | (22)                    |            |
|                  |                               |             | FasL(TNFSF6)            | Receptor ligand         | FASLG                   | EMSA, SEQ                | (23-26, 6, 27)          |            |
|                  |                               |             | FOXP3                   | Transcription factor    | FOXP3                   | SEQ                      | (28-31)                 |            |
|                  |                               |             | Granzyme B              | Generic protease        | GZMB                    | SEQ                      | (32-35)                 |            |
|                  |                               |             | HB-EGF                  | Receptor ligand         | HBEGF                   | SEQ                      | (36-40, 6, 41)          |            |
|                  |                               |             | HSP27                   | Generic binding protein | HSPB1                   | TAS                      | (42)                    |            |
|                  |                               |             | IGF-1                   | Receptor ligand         | IGF-1                   | EMSA                     | (43)                    |            |
|                  |                               |             | IL-1 beta               | Receptor ligand         | IL1B                    | EMSA                     | (44, 45)                |            |
|                  |                               |             | IL-18                   | Receptor ligand         | IL18                    | SEQ                      | (46, 47)                |            |
|                  |                               |             | IL-2                    | Receptor ligand         | IL2                     | EMSA                     | (48-55)                 |            |
|                  |                               |             | IL-4                    | Receptor ligand         | IL4                     | TAS                      | (56, 19)                |            |
|                  |                               |             | IL-5                    | Receptor ligand         | IL5                     | SEQ                      | (57-63)                 |            |
|                  |                               |             | MDM2                    | Generic enzyme          | MDM2                    | SEQ                      | (64, 65)                |            |
|                  |                               |             | MMP-12                  | Metalloprotease         | MMP12                   | SEQ                      | (66-69)                 |            |
|                  |                               |             | MMP-9                   | Metalloprotease         | MMP9                    | EMSA, SEQ                | (70-98)                 |            |
|                  |                               |             | MYOD                    | Transcription factor    | MYOD1                   | TAS                      | (99)                    |            |
|                  |                               |             | PLAU (UPA)              | Generic protease        | PLAU                    | EMSA                     | (100-102)               |            |
|                  |                               |             | PLAU (UPA)              | Generic protease        | PLAU                    | ChIP                     | (103)                   |            |
|                  |                               |             | Prolactin               | Receptor ligand         | PRL                     | SEQ                      | (104-110)               |            |
|                  |                               |             | SAT-1                   | Transporter             | SLC26A1                 | SEQ                      | (111-113)               |            |
|                  |                               |             | SMAD7                   | Generic binding protein | SMAD7                   | SEQ                      | (114-116)               |            |
|                  |                               |             | SNAIL1                  | Transcription factor    | SNAIL1                  | SEQ                      | (117)                   |            |
|                  |                               |             | SOD2                    | Generic enzyme          | SOD2                    | EMSA                     | (118, 119)              |            |
|                  |                               |             | TGF-beta 1              | Receptor ligand         | TGFB1                   | EMSA                     | (120-123, 19, 124, 125) |            |
|                  |                               | TIMP1       | Generic binding protein | TIMP1                   | SEQ                     | (126, 127, 88, 128, 94)  |                         |            |
|                  |                               | TIMP2       | Generic binding protein | TIMP2                   | SEQ                     | (129, 94)                |                         |            |
|                  |                               | TNF-alpha   | Receptor ligand         | TNF                     | SEQ                     | (130-133)                |                         |            |
|                  |                               | TNF-alpha   | Receptor ligand         | TNF                     | EMSA                    | (134, 135, 19, 136, 137) |                         |            |
|                  |                               | VEGF-A      | Receptor ligand         | VEGFA                   | EMSA, SEQ               | (138-149)                |                         |            |
|                  |                               | VEGF-D      | Receptor ligand         | FIGF                    | EMSA                    | (150)                    |                         |            |
|                  |                               | Inhibition  |                         | c-Myc                   | Transcription factor    | MYC                      | EMSA                    | (151, 152) |
|                  |                               |             |                         | MYOD                    | Transcription factor    | MYOD1                    | EMSA                    | (153)      |
|                  |                               |             |                         | PIT1                    | Transcription factor    | POU1F1                   | EMSA                    | (154, 155) |
|                  |                               |             |                         | Progesterone receptor   | Transcription factor    | PGR                      | ChIP                    | (156)      |
|                  |                               | Unspecified |                         | Cyclin D1               | Generic binding protein | CCND1                    | SEQ                     | (27, 157)  |
|                  |                               |             |                         | EGR1                    | Transcription factor    | EGR1                     | SEQ                     | (158)      |
| G-CSF            | Receptor ligand               |             |                         | CSF3                    | SEQ                     | (159)                    |                         |            |
| GFER             | Generic binding protein       |             |                         | GFER                    | SEQ                     | (160)                    |                         |            |
| IL-2             | Receptor ligand               |             |                         | IL2                     | SEQ                     | (161)                    |                         |            |
| IL-4             | Receptor ligand               |             |                         | IL4                     | TAS                     | (162)                    |                         |            |
| IL-5             | Receptor ligand               |             |                         | IL5                     | EMSA                    | (163)                    |                         |            |
| KLF4             | Transcription factor          |             |                         | KLF4                    | SEQ                     | (164)                    |                         |            |
| LL37             | Receptor ligand               |             |                         | CAMP                    | ChIP-chip, SEQ          | (165)                    |                         |            |
| M-CSF receptor   | Generic receptor              |             |                         | CSF1R                   | EMSA                    | (166)                    |                         |            |
| microRNA 221     | RNA                           |             |                         | miR-221                 | SEQ                     | (167)                    |                         |            |
| microRNA 222     | RNA                           |             |                         | miR-222                 | SEQ                     | (167)                    |                         |            |
| PCNA             | Generic binding protein       |             |                         | PCNA                    | SEQ                     | (168)                    |                         |            |
| PCY2             | Generic enzyme                |             |                         | PCYT2                   | SEQ                     | (169)                    |                         |            |
| PLAU (UPA)       | Generic protease              |             |                         | PLAU                    | SEQ                     | (100)                    |                         |            |
| SHP-1            | Protein phosphatase           |             |                         | PTPN6                   | SEQ                     | (170)                    |                         |            |
| SSAT             | Generic enzyme                |             |                         | SAT1                    | TAS                     | (171, 172)               |                         |            |
| Thrombospondin 1 | Receptor ligand               |             |                         | THBS1                   | SEQ                     | (173)                    |                         |            |
| TrkA             | Receptor with enzyme activity | NTRK1       | SEQ                     | (174)                   |                         |                          |                         |            |

CAT: chloramphenicol acetyl transferase assay; ChIP: chromatin immunoprecipitation assays; ChIP-chip: chromatin immunoprecipitation array; Co-IP: coimmunoprecipitation; SEQ: sequence analysis; TAS: Traceable Author Statement



Supplementary Table S11. Experimentally validated targets of EZH2

| 1st neighbor | Mechanism                       | Effect            | 2nd neighbor          | Object Type                   | Mapped HGNC Symbol | Interaction validation | Reference       |       |
|--------------|---------------------------------|-------------------|-----------------------|-------------------------------|--------------------|------------------------|-----------------|-------|
| EZH2         | <i>Binding</i>                  | <i>Activation</i> | DNMT1                 | Generic enzyme                | DNMT1              | Co-IP                  | (175-177)       |       |
|              |                                 |                   | DNMT3A                | Generic enzyme                | DNMT3A             | Co-IP                  | (175, 176)      |       |
|              |                                 |                   | DNMT3B                | Generic enzyme                | DNMT3B             | Co-IP                  | (175, 176, 178) |       |
|              |                                 |                   | ESR1 (nuclear)        | Transcription factor          | ESR1               | Co-IP                  | (179)           |       |
|              | <i>Transcription regulation</i> | <i>Activation</i> | c-Myc                 | Transcription factor          | MYC                | ChIP                   | (179)           |       |
|              |                                 |                   | Cyclin D1             | Generic binding protein       | CCND1              | ChIP                   | (179, 180)      |       |
|              |                                 |                   | PAX3                  | Transcription factor          | PAX3               | ChIP                   | (181-183)       |       |
|              |                                 |                   | WNT3A                 | Receptor ligand               | WNT3A              | ChIP                   | (182)           |       |
|              |                                 | <i>Inhibition</i> | 14-3-3 sigma          | Generic binding protein       | SFN                | ChIP                   | (184)           |       |
|              |                                 |                   | BMP2                  | Receptor ligand               | BMP2               | ChIP, SEQ              | (181, 185)      |       |
|              |                                 |                   | BMPR1B                | Receptor with enzyme activity | BMPR1B             | ChIP                   | (186)           |       |
|              |                                 |                   | C/EBPdelta            | Transcription factor          | CEBPD              | ChIP                   | (187)           |       |
|              |                                 |                   | CIITA                 | Generic binding protein       | CIITA              | ChIP                   | (188)           |       |
|              |                                 |                   | DKK1                  | Receptor ligand               | DKK1               | ChIP                   | (189-191)       |       |
|              |                                 |                   | FOXP1                 | Transcription factor          | FOXP1              | ChIP                   | (184)           |       |
|              |                                 |                   | HOXD13                | Transcription factor          | HOXD13             | ChIP                   | (181, 192)      |       |
|              |                                 |                   | IL-13                 | Receptor ligand               | IL13               | ChIP                   | (193)           |       |
|              |                                 |                   | IL-4                  | Receptor ligand               | IL4                | ChIP                   | (193, 194)      |       |
|              |                                 |                   | Lef-1                 | Transcription factor          | LEF1               | ChIP                   | (185)           |       |
|              |                                 |                   | NANOG                 | Transcription factor          | NANOG              | ChIP                   | (182, 195)      |       |
|              |                                 |                   | Oct-3/4               | Transcription factor          | POU5F1             | ChIP                   | (182, 189, 196) |       |
|              |                                 |                   | p14ARF                | Generic binding protein       | CDKN2A             | ChIP                   | (197-199)       |       |
|              |                                 |                   | p15                   | Generic binding protein       | CDKN2B             | ChIP                   | (197, 198, 192) |       |
|              |                                 |                   | p53                   | Transcription factor          | TP53               | ChIP                   | (191)           |       |
|              |                                 |                   | p73                   | Transcription factor          | TP73               | ChIP                   | (200)           |       |
|              |                                 |                   | PKA-cat beta          | Protein kinase                | PRKACB             | ChIP                   | (184)           |       |
|              |                                 |                   | Progesterone receptor | Transcription factor          | PGR                | ChIP, ChIP-chip        | (181, 201)      |       |
|              |                                 |                   | PTEN                  | Lipid phosphatase             | PTEN               | ChIP                   | (202, 203)      |       |
|              |                                 |                   | RASSF1                | Generic binding protein       | RASSF1             | ChIP                   | (178)           |       |
|              |                                 |                   | RUNX3                 | Transcription factor          | RUNX3              | ChIP                   | (181, 204, 205) |       |
|              |                                 |                   | SDF-1                 | Receptor ligand               | CXCL12             | ChIP, ChIP-chip        | (181, 206)      |       |
|              |                                 |                   | <i>Unspecified</i>    | IFN-gamma                     | Receptor ligand    | IFNG                   | ChIP            | (194) |

ChIP: chromatin immunoprecipitation assays; ChIP-chip: chromatin immunoprecipitation array; Co-IP: coimmunoprecipitation; SEQ: sequence analysis

Supplementary table S12: Significantly enriched pathways enriched by secondary nodes in miR-101 subset

## KEGG pathway enrichment by 162 secondary nodes in miR-101 subset

| Term                                               | Count | %     | Fold Enrichment | P-Value  | Benjamini | FDR      |
|----------------------------------------------------|-------|-------|-----------------|----------|-----------|----------|
| hsa04110:Cell cycle                                | 24    | 8.08  | 6.03            | 3.28E-12 | 9.09E-11  | 3.71E-09 |
| hsa04350:TGF-beta signaling pathway                | 18    | 6.06  | 6.49            | 1.01E-09 | 1.87E-08  | 1.15E-06 |
| hsa04510:Focal adhesion                            | 26    | 8.75  | 4.06            | 2.35E-09 | 3.26E-08  | 2.66E-06 |
| hsa04010:MAPK signaling pathway                    | 30    | 10.10 | 3.53            | 2.68E-09 | 3.30E-08  | 3.03E-06 |
| hsa04722:Neurotrophin signaling pathway            | 20    | 6.73  | 5.06            | 7.34E-09 | 8.14E-08  | 8.30E-06 |
| hsa04060:Cytokine-cytokine receptor interaction    | 28    | 9.43  | 3.35            | 3.21E-08 | 3.24E-07  | 3.63E-05 |
| hsa04012:ErbB signaling pathway                    | 15    | 5.05  | 5.41            | 4.21E-07 | 3.60E-06  | 4.77E-04 |
| hsa04062:Chemokine signaling pathway               | 21    | 7.07  | 3.52            | 1.31E-06 | 9.70E-06  | 1.48E-03 |
| hsa04520:Adherens junction                         | 12    | 4.04  | 4.89            | 2.50E-05 | 1.46E-04  | 2.82E-02 |
| hsa04630:Jak-STAT signaling pathway                | 17    | 5.72  | 3.44            | 2.54E-05 | 1.41E-04  | 2.87E-02 |
| hsa04310:Wnt signaling pathway                     | 16    | 5.39  | 3.33            | 7.21E-05 | 3.64E-04  | 8.16E-02 |
| hsa04210:Apoptosis                                 | 12    | 4.04  | 4.33            | 7.95E-05 | 3.84E-04  | 9.00E-02 |
| hsa04660:T cell receptor signaling pathway         | 12    | 4.04  | 3.49            | 5.52E-04 | 2.55E-03  | 6.23E-01 |
| hsa04115:p53 signaling pathway                     | 9     | 3.03  | 4.15            | 1.25E-03 | 5.52E-03  | 1.40E+00 |
| hsa04664:Fc epsilon RI signaling pathway           | 9     | 3.03  | 3.62            | 3.02E-03 | 1.19E-02  | 3.37E+00 |
| hsa04910:Insulin signaling pathway                 | 12    | 4.04  | 2.79            | 3.43E-03 | 1.31E-02  | 3.81E+00 |
| hsa04340:Hedgehog signaling pathway                | 7     | 2.36  | 3.92            | 8.05E-03 | 2.95E-02  | 8.74E+00 |
| hsa04650:Natural killer cell mediated cytotoxicity | 11    | 3.70  | 2.60            | 9.08E-03 | 3.21E-02  | 9.81E+00 |
| hsa04912:GnRH signaling pathway                    | 9     | 3.03  | 2.88            | 1.19E-02 | 4.08E-02  | 1.27E+01 |
| hsa04620:Toll-like receptor signaling pathway      | 9     | 3.03  | 2.80            | 1.41E-02 | 4.68E-02  | 1.49E+01 |
| hsa04360:Axon guidance                             | 10    | 3.37  | 2.43            | 2.05E-02 | 6.53E-02  | 2.09E+01 |
| hsa04662:B cell receptor signaling pathway         | 7     | 2.36  | 2.93            | 3.06E-02 | 8.91E-02  | 2.97E+01 |
| hsa04370:VEGF signaling pathway                    | 7     | 2.36  | 2.93            | 3.06E-02 | 8.91E-02  | 2.97E+01 |
| hsa04670:Leukocyte transendothelial migration      | 9     | 3.03  | 2.39            | 3.27E-02 | 9.25E-02  | 3.13E+01 |
| hsa04916:Melanogenesis                             | 8     | 2.69  | 2.54            | 3.66E-02 | 9.82E-02  | 3.44E+01 |
| hsa04940:Type I diabetes mellitus                  | 5     | 1.68  | 3.74            | 4.26E-02 | 1.11E-01  | 3.89E+01 |
| hsa04320:Dorso-ventral axis formation              | 4     | 1.35  | 5.02            | 4.30E-02 | 1.10E-01  | 3.92E+01 |

## BioCarta pathway enrichment by 144 secondary nodes in miR-101 subset

| Term                                                                                               | Count | %    | Fold Enrichment | PValue   | Benjamini | FDR      |
|----------------------------------------------------------------------------------------------------|-------|------|-----------------|----------|-----------|----------|
| h_g1Pathway:Cell Cycle: G1/S Check Point                                                           | 15    | 5.05 | 5.16            | 1.06E-07 | 2.36E-05  | 1.35E-04 |
| h_p38mapkPathway:p38 MAPK Signaling Pathway                                                        | 15    | 5.05 | 4.54            | 7.85E-07 | 8.75E-05  | 1.00E-03 |
| h_tgfbPathway:TGF beta signaling pathway                                                           | 9     | 3.03 | 5.28            | 8.89E-05 | 6.58E-03  | 1.13E-01 |
| h_etsPathway:METS affect on Macrophage Differentiation                                             | 8     | 2.69 | 4.99            | 4.43E-04 | 2.44E-02  | 5.64E-01 |
| h_keratinocytePathway:Keratinocyte Differentiation                                                 | 12    | 4.04 | 3.15            | 7.31E-04 | 3.21E-02  | 9.29E-01 |
| h_cellcyclePathway:Cyclins and Cell Cycle Regulation                                               | 9     | 3.03 | 3.59            | 1.97E-03 | 7.07E-02  | 2.49E+00 |
| h_mapkPathway:MAPKinase Signaling Pathway                                                          | 17    | 5.72 | 2.12            | 3.91E-03 | 1.17E-01  | 4.88E+00 |
| h_ptenPathway:PTEN dependent cell cycle arrest and apoptosis                                       | 8     | 2.69 | 3.63            | 3.95E-03 | 1.04E-01  | 4.92E+00 |
| h_p53Pathway:p53 Signaling Pathway                                                                 | 7     | 2.36 | 4.11            | 4.29E-03 | 1.01E-01  | 5.33E+00 |
| h_prc2Pathway:The PRC2 Complex Sets Long-term Gene Silencing Through Modification of Histone Tails | 6     | 2.02 | 4.61            | 6.06E-03 | 1.27E-01  | 7.46E+00 |
| h_arfPathway:Tumor Suppressor Arf Inhibits Ribosomal Biogenesis                                    | 6     | 2.02 | 4.61            | 6.06E-03 | 1.27E-01  | 7.46E+00 |
| h_hsp27Pathway:Stress Induction of HSP Regulation                                                  | 6     | 2.02 | 4.28            | 8.68E-03 | 1.62E-01  | 1.05E+01 |
| h_ctcfPathway:CTCF: First Multivalent Nuclear Factor                                               | 7     | 2.36 | 3.49            | 1.04E-02 | 1.77E-01  | 1.25E+01 |
| h_inflamPathway:Cytokines and Inflammatory Response                                                | 8     | 2.69 | 3.07            | 1.08E-02 | 1.70E-01  | 1.30E+01 |
| h_pmlPathway:Regulation of transcriptional activity by PML                                         | 6     | 2.02 | 3.99            | 1.20E-02 | 1.75E-01  | 1.43E+01 |
| h_At1rPathway:Angiotensin II mediated activation of JNK Pathway via Pyk2 dependent signaling       | 8     | 2.69 | 2.96            | 1.34E-02 | 1.82E-01  | 1.58E+01 |
| h_alkPathway:ALK in cardiac myocytes                                                               | 9     | 3.03 | 2.64            | 1.52E-02 | 1.93E-01  | 1.78E+01 |
| h_RacCycDPPathway:Influence of Ras and Rho proteins on G1 to S Transition                          | 7     | 2.36 | 2.91            | 2.59E-02 | 2.92E-01  | 2.85E+01 |
| h_nthiPathway:NFKB activation by Nontypeable Hemophilus influenzae                                 | 7     | 2.36 | 2.91            | 2.59E-02 | 2.92E-01  | 2.85E+01 |
| h_carm-erPathway:CARM1 and Regulation of the Estrogen Receptor                                     | 7     | 2.36 | 2.79            | 3.14E-02 | 3.27E-01  | 3.34E+01 |
| h_wntPathway:WNT Signaling Pathway                                                                 | 7     | 2.36 | 2.79            | 3.14E-02 | 3.27E-01  | 3.34E+01 |
| h_pdgfrPathway:PDGF Signaling Pathway                                                              | 7     | 2.36 | 2.79            | 3.14E-02 | 3.27E-01  | 3.34E+01 |
| h_HivnefPathway:HIV-1 Nef: negative effector of Fas and TNF                                        | 11    | 3.70 | 2.07            | 3.17E-02 | 3.15E-01  | 3.37E+01 |
| h_egfPathway:EGF Signaling Pathway                                                                 | 7     | 2.36 | 2.69            | 3.76E-02 | 3.48E-01  | 3.87E+01 |
| h_il2rbPathway:IL-2 Receptor Beta Chain in T cell Activation                                       | 8     | 2.69 | 2.42            | 3.89E-02 | 3.44E-01  | 3.97E+01 |
| h_cytokinePathway:Cytokine Network                                                                 | 6     | 2.02 | 2.99            | 4.12E-02 | 3.47E-01  | 4.16E+01 |

## Supplementary Reference

1. Yuan,Z., Gong,S., Luo,J., Zheng,Z., Song,B., Ma,S., Guo,J., Hu,C., Thiel,G., Vinson,C., et al. (2009) Opposing roles for ATF2 and c-Fos in c-Jun-mediated neuronal apoptosis. *Mol Cell Biol*, **29**, 2431–2442.
2. Li,Q., Dashwood,W.-M., Zhong,X., Al-Fageeh,M. and Dashwood,R.H. (2004) Cloning of the rat beta-catenin gene (Ctnnb1) promoter and its functional analysis compared with the Catnb and CTNNB1 promoters. *Genomics*, **83**, 231–242.
3. Qiao,D., Im,E., Qi,W. and Martinez,J.D. (2002) Activator protein-1 and CCAAT/enhancer-binding protein mediated GADD153 expression is involved in deoxycholic acid-induced apoptosis. *Biochim Biophys Acta*, **1583**, 108–116.
4. Hansen,T.V.O., Borup,R., Marstrand,T., Rehfeld,J.F. and Nielsen,F.C. (2008) Cholecystokinin-2 receptor mediated gene expression in neuronal PC12 cells. *J. Neurochem.*, **104**, 1450–1465.
5. Lee,M.J., Kwak,Y.K., You,K.R., Lee,B.H. and Kim,D.G. (2009) Involvement of GADD153 and cardiac ankyrin repeat protein in cardiac ischemia-reperfusion injury. *Exp. Mol. Med.*, **41**, 243–252.
6. Eferl,R. and Wagner,E.F. (2003) AP-1: a double-edged sword in tumorigenesis. *Nat Rev Cancer*, **3**, 859–868.
7. Seth,P., Mahajan,V.S. and Chauhan,S.S. (2003) Transcription of human cathepsin L mRNA species hCATL B from a novel alternative promoter in the first intron of its gene. *Gene*, **321**, 83–91.
8. Yamaguchi,T., Naruishi,K., Arai,H., Nishimura,F. and Takashiba,S. (2008) IL-6/sIL-6R enhances cathepsin B and L production via caveolin-1-mediated JNK-AP-1 pathway in human gingival fibroblasts. *J Cell Physiol*, **217**, 423–432.
9. Lennon,A.M., Ottone,C., Rigaud,G., Deaven,L.L., Longmire,J., Fellous,M., Bono,R. and Alcaïde-Loridan,C. (1997) Isolation of a B-cell-specific promoter for the human class II transactivator. *Immunogenetics*, **45**, 266–273.
10. Sabbah,M., Courilleau,D., Mester,J. and Redeuilh,G. (1999) Estrogen induction of the cyclin D1 promoter: involvement of a cAMP response-like element. *Proc Natl Acad Sci U S A*, **96**, 11217–11222.
11. O'Lone,R., Frith,M.C., Karlsson,E.K. and Hansen,U. (2004) Genomic targets of nuclear estrogen receptors. *Mol Endocrinol*, **18**, 1859–1875.
12. Cicatiello,L., Addeo,R., Sasso,A., Altucci,L., Petrizzi,V.B., Borgo,R., Cancemi,M., Caporali,S., Caristi,S., Scafoglio,C., et al. (2004) Estrogens and progesterone promote persistent CCND1 gene activation during G1 by inducing transcriptional derepression via c-Jun/c-Fos/estrogen receptor (progesterone receptor) complex assembly to a distal regulatory element and recruitment of cyclin D1 to its own gene promoter. *Mol Cell Biol*, **24**, 7260–7274.
13. Singh,R.R. and Kumar,R. (2005) Steroid hormone receptor signaling in tumorigenesis. *J Cell Biochem*, **96**, 490–505.

14. Vikhanskaya,F., Toh,W.H., Dulloo,I., Wu,Q., Boominathan,L., Ng,H.-H., Vousden,K.H. and Sabapathy,K. (2007) p73 supports cellular growth through c-Jun-dependent AP-1 transactivation. *Nat Cell Biol*, **9**, 698–705.
15. Sreeramaneni,R., Chaudhry,A., McMahon,M., Sherr,C.J. and Inoue,K. (2005) Ras-Raf-Arf signaling critically depends on the Dmp1 transcription factor. *Mol Cell Biol*, **25**, 220–232.
16. Inoue,K., Mallakin,A. and Frazier,D.P. (2007) Dmp1 and tumor suppression. *Oncogene*, **26**, 4329–4335.
17. Liu,Y., Li,J.Z., Yuan,X.H., Adler-Storhcz,K. and Che,Z. (2002) An AP-1 binding site mutation in HPV-16 LCR enhances E6/E7 promoter activity in human oral epithelial cells. *Virus Genes*, **24**, 29–37.
18. Faluhelyi,Z., Rodler,I., Csejtey,A., Tyring,S.K., Ember,I.A. and Arany,I. (2004) All-trans retinoic acid (ATRA) suppresses transcription of human papillomavirus type 16 (HPV16) in a dose-dependent manner. *Anticancer Res.*, **24**, 807–809.
19. Hayakawa,J., Mittal,S., Wang,Y., Korkmaz,K.S., Adamson,E., English,C., Ohmichi,M., Omichi,M., McClelland,M. and Mercola,D. (2004) Identification of promoters bound by c-Jun/ATF2 during rapid large-scale gene activation following genotoxic stress. *Molecular Cell*, **16**, 521–535.
20. King,P.H., Fuller,J.J., Nabors,L.B. and Detloff,P.J. (2000) Analysis of the 5' end of the mouse *Elavl1* (mHuA) gene reveals a transcriptional regulatory element and evidence for conserved genomic organization. *Gene*, **242**, 125–131.
21. Grant,P.A., Thompson,C.B. and Pettersson,S. (1995) IgM receptor-mediated transactivation of the IgH 3' enhancer couples a novel Elf-1-AP-1 protein complex to the developmental control of enhancer function. *The EMBO Journal*, **14**, 4501–4513.
22. Hu,P., Kinyamu,H.K., Wang,L., Martin,J., Archer,T.K. and Teng,C. (2008) Estrogen induces estrogen-related receptor alpha gene expression and chromatin structural changes in estrogen receptor (ER)-positive and ER-negative breast cancer cells. *J Biol Chem*, **283**, 6752–6763.
23. Trivedi,H. (1975) Letter: Iliacus hematoma syndrome. *Can Med Assoc J*, **113**, 16–19.
24. Kasibhatla,S., Brunner,T., Genestier,L., Echeverri,F., Mahboubi,A. and Green,D.R. (1998) DNA damaging agents induce expression of Fas ligand and subsequent apoptosis in T lymphocytes via the activation of NF-kappa B and AP-1. *Molecular Cell*, **1**, 543–551.
25. Matsui,K., Xiao,S., Fine,A. and Ju,S.T. (2000) Role of activator protein-1 in TCR-mediated regulation of the murine *fasl* promoter. *J. Immunol.*, **164**, 3002–3008.
26. Shaulian,E. and Karin,M. (2001) AP-1 in cell proliferation and survival. *Oncogene*, **20**, 2390–2400.
27. Zenz,R., Eferl,R., Scheinecker,C., Redlich,K., Smolen,J., Schonhaler,H.B., Kenner,L., Tschachler,E. and Wagner,E.F. (2008) Activator protein 1 (Fos/Jun) functions in inflammatory bone and skin disease. *Arthritis Res. Ther.*, **10**, 201.

28. Mantel,P.-Y., Ouaked,N., Rückert,B., Karagiannidis,C., Welz,R., Blaser,K. and Schmidt-Weber,C.B. (2006) Molecular mechanisms underlying FOXP3 induction in human T cells. *J. Immunol.*, **176**, 3593–3602.
29. Grant,C., Oh,U., Yao,K., Yamano,Y. and Jacobson,S. (2008) Dysregulation of TGF- $\beta$  signaling and regulatory and effector T-cell function in virus-induced neuroinflammatory disease. *Blood*, **111**, 5601–5609.
30. Huehn,J., Polansky,J.K. and Hamann,A. (2009) Epigenetic control of FOXP3 expression: the key to a stable regulatory T-cell lineage? *Nat Rev Immunol*, **9**, 83–89.
31. Su,J. and Liu,Y.-C. (2010) Foxp3 positive regulatory T cells: a functional regulation by the E3 ubiquitin ligase Itch. *Semin Immunopathol*, **32**, 149–156.
32. Hanson,R.D. and Ley,T.J. (1990) Transcriptional activation of the human cytotoxic serine protease gene CSP-B in T lymphocytes. *Mol Cell Biol*, **10**, 5655–5662.
33. Wargnier,A., Legros-Maïda,S., Bosselut,R., Bourge,J.F., Lafaurie,C., Ghysdael,C.J., Sasportes,M. and Paul,P. (1995) Identification of human granzyme B promoter regulatory elements interacting with activated T-cell-specific proteins: implication of Ikaros and CBF binding sites in promoter activation. *Proc Natl Acad Sci U S A*, **92**, 6930–6934.
34. Babichuk,C.K., Duggan,B.L. and Bleackley,R.C. (1996) In vivo regulation of murine granzyme B gene transcription in activated primary T cells. *J Biol Chem*, **271**, 16485–16493.
35. Wargnier,A., Lafaurie,C., Legros-Maïda,S., Bourge,J.F., Sigaux,F., Sasportes,M. and Paul,P. (1998) Down-regulation of human granzyme B expression by glucocorticoids. Dexamethasone inhibits binding to the Ikaros and AP-1 regulatory elements of the granzyme B promoter. *J Biol Chem*, **273**, 35326–35331.
36. Chen,X., Raab,G., Deutsch,U., Zhang,J., Ezzell,R.M. and Klagsbrun,M. (1995) Induction of heparin-binding EGF-like growth factor expression during myogenesis. Activation of the gene by MyoD and localization of the transmembrane form of the protein on the myotube surface. *J Biol Chem*, **270**, 18285–18294.
37. McCarthy,S.A., Chen,D., Yang,B.S., Garcia Ramirez,J.J., Cherwinski,H., Chen,X.R., Klagsbrun,M., Hauser,C.A., Ostrowski,M.C. and McMahon,M. (1997) Rapid phosphorylation of Ets-2 accompanies mitogen-activated protein kinase activation and the induction of heparin-binding epidermal growth factor gene expression by oncogenic Raf-1. *Mol Cell Biol*, **17**, 2401–2412.
38. Fu,S.L., Bottoli,I., Goller,M. and Vogt,P.K. (1999) Heparin-binding epidermal growth factor-like growth factor, a v-Jun target gene, induces oncogenic transformation. *Proc Natl Acad Sci U S A*, **96**, 5716–5721.
39. Pascall,J.C., Ellis,P.D. and Brown,K.D. (2000) Characterisation of the rat heparin-binding epidermal growth factor-like growth factor gene promoter. *Biochim Biophys Acta*, **1492**, 434–440.

40. Sakai, M., Tsukada, T. and Harris, R.C. (2001) Oxidant stress activates AP-1 and heparin-binding epidermal growth factor-like growth factor transcription in renal epithelial cells. *Exp. Nephrol.*, **9**, 28–39.
41. Wang, F., Liu, R., Lee, S.W., Sloss, C.M., Couget, J. and Cusack, J.C. (2007) Heparin-binding EGF-like growth factor is an early response gene to chemotherapy and contributes to chemotherapy resistance. *Oncogene*, **26**, 2006–2016.
42. Assimakopoulou, M. and Varakis, J. (2001) AP-1 and heat shock protein 27 expression in human astrocytomas. *J. Cancer Res. Clin. Oncol.*, **127**, 727–732.
43. Wang, X., Yang, Y. and Adamo, M.L. (1997) Characterization of the rat insulin-like growth factor I gene promoters and identification of a minimal exon 2 promoter. *Endocrinology*, **138**, 1528–1536.
44. Roman, J., Ritzenthaler, J.D., Perez, R.L. and Roser, S.L. (1999) Differential modes of regulation of interleukin-1beta expression by extracellular matrices. *Immunology*, **98**, 228–237.
45. Roman, J., Ritzenthaler, J.D., Fenton, M.J., Roser, S. and Schuyler, W. (2000) Transcriptional regulation of the human interleukin 1beta gene by fibronectin: role of protein kinase C and activator protein 1 (AP-1). *Cytokine*, **12**, 1581–1596.
46. Kim, Y.M., Im, J.Y., Han, S.H., Kang, H.S. and Choi, I. (2000) IFN-gamma up-regulates IL-18 gene expression via IFN consensus sequence-binding protein and activator protein-1 elements in macrophages. *J. Immunol.*, **165**, 3198–3205.
47. Kalina, U., Ballas, K., Koyama, N., Kauschat, D., Miething, C., Arnemann, J., Martin, H., Hoelzer, D. and Ottmann, O.G. (2000) Genomic organization and regulation of the human interleukin-18 gene. *Scand. J. Immunol.*, **52**, 525–530.
48. Yaseen, N.R., Park, J., Kerppola, T., Curran, T. and Sharma, S. (1994) A central role for Fos in human B- and T-cell NFAT (nuclear factor of activated T cells): an acidic region is required for in vitro assembly. *Mol Cell Biol*, **14**, 6886–6895.
49. Alroy, I., Towers, T.L. and Freedman, L.P. (1995) Transcriptional repression of the interleukin-2 gene by vitamin D3: direct inhibition of NFATp/AP-1 complex formation by a nuclear hormone receptor. *Mol Cell Biol*, **15**, 5789–5799.
50. Wolfe, S.A., Zhou, P., Dötsch, V., Chen, L., You, A., Ho, S.N., Crabtree, G.R., Wagner, G. and Verdine, G.L. (1997) Unusual Rel-like architecture in the DNA-binding domain of the transcription factor NFATc. *Nature*, **385**, 172–176.
51. Macián, F., García-Rodríguez, C. and Rao, A. (2000) Gene expression elicited by NFAT in the presence or absence of cooperative recruitment of Fos and Jun. *The EMBO Journal*, **19**, 4783–4795.
52. Choudhry, M.A., Mao, H., Haque, F., Khan, M., Fazal, N. and Sayeed, M.M. (2002) Role of NFAT and AP-1 in PGE2-mediated T cell suppression in burn injury. *Shock*, **18**, 212–216.

53. Ghoreschi, K., Mrowietz, U. and Röcken, M. (2003) A molecule solves psoriasis? Systemic therapies for psoriasis inducing interleukin 4 and Th2 responses. *J. Mol. Med.*, **81**, 471–480.
54. Weaver, J.R., Good, K., Walters, R.D., Kugel, J.F. and Goodrich, J.A. (2007) Characterization of the sequence and architectural constraints of the regulatory and core regions of the human interleukin-2 promoter. *Mol. Immunol.*, **44**, 2813–2819.
55. del Rio, R., Noubade, R., Subramanian, M., Saligrama, N., Diehl, S., Rincon, M. and Teuscher, C. (2008) SNPs upstream of the minimal promoter control IL-2 expression and are candidates for the autoimmune disease-susceptibility locus Aod2/Idd3/Eae3. *Genes Immun.*, **9**, 115–121.
56. Li-Weber, M. and Krammer, P.H. (2003) Regulation of IL4 gene expression by T cells and therapeutic perspectives. *Nat Rev Immunol*, **3**, 534–543.
57. Stranick, K.S., Zambas, D.N., Uss, A.S., Egan, R.W., Billah, M.M. and Umland, S.P. (1997) Identification of transcription factor binding sites important in the regulation of the human interleukin-5 gene. *J Biol Chem*, **272**, 16453–16465.
58. Cousins, D.J., Richards, D., Kemeny, D.M., Romagnani, S., Lee, T.H. and Staynov, D.Z. (2000) DNase I footprinting of the human interleukin-5 gene promoter. *Immunology*, **99**, 101–108.
59. Schwenger, G.T., Fournier, R., Kok, C.C., Mordvinov, V.A., Yeoman, D. and Sanderson, C.J. (2001) GATA-3 has dual regulatory functions in human interleukin-5 transcription. *J Biol Chem*, **276**, 48502–48509.
60. Liu, C., Lu, J., Tan, J., Li, L. and Huang, B. (2004) Human interleukin-5 expression is synergistically regulated by histone acetyltransferase CBP/p300 and transcription factors C/EBP, NF-AT and AP-1. *Cytokine*, **27**, 93–100.
61. Wang, J., Shannon, M.F. and Young, I.G. (2006) A role for Ets1, synergizing with AP-1 and GATA-3 in the regulation of IL-5 transcription in mouse Th2 lymphocytes. *Int. Immunol.*, **18**, 313–323.
62. Budagian, V., Bulanova, E., Paus, R. and Bulfone-Paus, S. (2006) IL-15/IL-15 receptor biology: a guided tour through an expanding universe. *Cytokine Growth Factor Rev.*, **17**, 259–280.
63. Wang, J. and Young, I.G. (2007) Eosinophilic inflammation: mechanisms regulating IL-5 transcription in human T lymphocytes. *Allergy*, **62**, 1131–1138.
64. Phelps, M., Darley, M., Primrose, J.N. and Blaydes, J.P. (2003) p53-independent activation of the hdm2-P2 promoter through multiple transcription factor response elements results in elevated hdm2 expression in estrogen receptor alpha-positive breast cancer cells. *Cancer Res*, **63**, 2616–2623.
65. Li, M., Zhang, Z., Hill, D.L., Wang, H. and Zhang, R. (2007) Curcumin, a dietary component, has anticancer, chemosensitization, and radiosensitization effects by down-regulating the MDM2 oncogene through the PI3K/mTOR/ETS2 pathway. *Cancer Res*, **67**, 1988–1996.

66. Belaaouaj,A., Shipley,J.M., Kobayashi,D.K., Zimonjic,D.B., Popescu,N., Silverman,G.A. and Shapiro,S.D. (1995) Human macrophage metalloelastase. Genomic organization, chromosomal location, gene linkage, and tissue-specific expression. *J Biol Chem*, **270**, 14568–14575.
67. Feinberg,M.W., Jain,M.K., Werner,F., Sibinga,N.E., Wiesel,P., Wang,H., Topper,J.N., Perrella,M.A. and Lee,M.E. (2000) Transforming growth factor-beta 1 inhibits cytokine-mediated induction of human metalloelastase in macrophages. *J Biol Chem*, **275**, 25766–25773.
68. Wu,L., Tanimoto,A., Murata,Y., Fan,J., Sasaguri,Y. and Watanabe,T. (2001) Induction of human matrix metalloproteinase-12 gene transcriptional activity by GM-CSF requires the AP-1 binding site in human U937 monocytic cells. *Biochemical and biophysical research communications*, **285**, 300–307.
69. Wu,L., Tanimoto,A., Murata,Y., Sasaguri,T., Fan,J., Sasaguri,Y. and Watanabe,T. (2003) Matrix metalloproteinase-12 gene expression in human vascular smooth muscle cells. *Genes Cells*, **8**, 225–234.
70. Gum,R., Lengyel,E., Juarez,J., Chen,J.H., Sato,H., Seiki,M. and Boyd,D. (1996) Stimulation of 92-kDa gelatinase B promoter activity by ras is mitogen-activated protein kinase kinase 1-independent and requires multiple transcription factor binding sites including closely spaced PEA3/ets and AP-1 sequences. *J Biol Chem*, **271**, 10672–10680.
71. He,C. (1996) Molecular mechanism of transcriptional activation of human gelatinase B by proximal promoter. *Cancer Letters*, **106**, 185–191.
72. Munaut,C., Salonurmi,T., Kontusaari,S., Reponen,P., Morita,T., Foidart,J.M. and Tryggvason,K. (1999) Murine matrix metalloproteinase 9 gene. 5'-upstream region contains cis-acting elements for expression in osteoclasts and migrating keratinocytes in transgenic mice. *J Biol Chem*, **274**, 5588–5596.
73. Eberhardt,W., Huwiler,A., Beck,K.F., Walpen,S. and Pfeilschifter,J. (2000) Amplification of IL-1 beta-induced matrix metalloproteinase-9 expression by superoxide in rat glomerular mesangial cells is mediated by increased activities of NF-kappa B and activating protein-1 and involves activation of the mitogen-activated protein kinase pathways. *J. Immunol.*, **165**, 5788–5797.
74. Xu,J., Kim,G.M., Ahmed,S.H., Xu,J., Yan,P., Xu,X.M. and Hsu,C.Y. (2001) Glucocorticoid receptor-mediated suppression of activator protein-1 activation and matrix metalloproteinase expression after spinal cord injury. *J Neurosci*, **21**, 92–97.
75. Yan,C., Wang,H. and Boyd,D.D. (2001) KiSS-1 represses 92-kDa type IV collagenase expression by down-regulating NF-kappa B binding to the promoter as a consequence of I kappa B alpha -induced block of p65/p50 nuclear translocation. *J Biol Chem*, **276**, 1164–1172.
76. Simon,C., Simon,M., Vucelic,G., Hicks,M.J., Plinkert,P.K., Koitschev,A. and Zenner,H.P. (2001) The p38 SAPK pathway regulates the expression of the MMP-9 collagenase via AP-1-dependent promoter activation. *Exp Cell Res*, **271**, 344–355.



77. Eberhardt,W., Schulze,M., Engels,C., Klasmeier,E. and Pfeilschifter,J. (2002) Glucocorticoid-mediated suppression of cytokine-induced matrix metalloproteinase-9 expression in rat mesangial cells: involvement of nuclear factor-kappaB and Ets transcription factors. *Mol Endocrinol*, **16**, 1752–1766.
78. Ho,L.-L., Chen,W.-J., Lin-Shiau,S.-Y. and Lin,J.-K. (2002) Penta-O-galloyl-beta-D-glucose inhibits the invasion of mouse melanoma by suppressing metalloproteinase-9 through down-regulation of activator protein-1. *Eur. J. Pharmacol.*, **453**, 149–158.
79. Moon,S.-K., Cho,G.-O., Jung,S.-Y., Gal,S.-W., Kwon,T.K., Lee,Y.-C., Madamanchi,N.R. and Kim,C.-H. (2003) Quercetin exerts multiple inhibitory effects on vascular smooth muscle cells: role of ERK1/2, cell-cycle regulation, and matrix metalloproteinase-9. *Biochemical and biophysical research communications*, **301**, 1069–1078.
80. Lai,W.-C., Zhou,M., Shankavaram,U., Peng,G. and Wahl,L.M. (2003) Differential regulation of lipopolysaccharide-induced monocyte matrix metalloproteinase (MMP)-1 and MMP-9 by p38 and extracellular signal-regulated kinase 1/2 mitogen-activated protein kinases. *J. Immunol.*, **170**, 6244–6249.
81. Holvoet,S., Vincent,C., Schmitt,D. and Serres,M. (2003) The inhibition of MAPK pathway is correlated with down-regulation of MMP-9 secretion induced by TNF-alpha in human keratinocytes. *Exp Cell Res*, **290**, 108–119.
82. Li,Y.-T., Shen,F., Liu,B.-H. and Cheng,G.-F. (2003) Resveratrol inhibits matrix metalloproteinase-9 transcription in U937 cells. *Acta Pharmacol. Sin.*, **24**, 1167–1171.
83. Kobayashi,T., Kishimoto,J., Hattori,S., Wachi,H., Shinkai,H. and Burgeson,R.E. (2004) Matrix metalloproteinase 9 expression is coordinately modulated by the KRE-M9 and 12-O-tetradecanoyl-phorbol-13-acetate responsive elements. *J Invest Dermatol*, **122**, 278–285.
84. Takahra,T., Smart,D.E., Oakley,F. and Mann,D.A. (2004) Induction of myofibroblast MMP-9 transcription in three-dimensional collagen I gel cultures: regulation by NF-kappaB, AP-1 and Sp1. *Int J Biochem Cell Biol*, **36**, 353–363.
85. Moon,S.-K., Cha,B.-Y. and Kim,C.-H. (2004) ERK1/2 mediates TNF-alpha-induced matrix metalloproteinase-9 expression in human vascular smooth muscle cells via the regulation of NF-kappaB and AP-1: Involvement of the ras dependent pathway. *J Cell Physiol*, **198**, 417–427.
86. Karmakar,S., Dhar,R. and Das,C. (2004) Inhibition of cytrophoblastic (JEG-3) cell invasion by interleukin 12 involves an interferon gamma-mediated pathway. *J Biol Chem*, **279**, 55297–55307.
87. Hong,S., Park,K.-K., Magae,J., Ando,K., Lee,T.-S., Kwon,T.K., Kwak,J.-Y., Kim,C.-H. and Chang,Y.-C. (2005) Ascochlorin inhibits matrix metalloproteinase-9 expression by suppressing activator protein-1-mediated gene expression through the ERK1/2 signaling pathway: inhibitory effects of ascochlorin on the invasion of renal carcinoma cells. *J Biol Chem*, **280**, 25202–25209.

88. Deschamps,A.M. and Spinale,F.G. (2006) Pathways of matrix metalloproteinase induction in heart failure: bioactive molecules and transcriptional regulation. *Cardiovasc. Res.*, **69**, 666–676.
89. Cohen,M., Meisser,A., Haenggeli,L. and Bischof,P. (2006) Involvement of MAPK pathway in TNF-alpha-induced MMP-9 expression in human trophoblastic cells. *Mol. Hum. Reprod.*, **12**, 225–232.
90. Han,S., Ritzenthaler,J.D., Sitaraman,S.V. and Roman,J. (2006) Fibronectin increases matrix metalloproteinase 9 expression through activation of c-Fos via extracellular-regulated kinase and phosphatidylinositol 3-kinase pathways in human lung carcinoma cells. *J Biol Chem*, **281**, 29614–29624.
91. Suh,S.-J., Jin,U.-H., Kim,S.-H., Chang,H.-W., Son,J.-K., Lee,S.H., Son,K.-H. and Kim,C.-H. (2006) Ochnaflavone inhibits TNF-alpha-induced human VSMC proliferation via regulation of cell cycle, ERK1/2, and MMP-9. *J Cell Biochem*, **99**, 1298–1307.
92. Taheri,F. and Bazan,H.E.P. (2007) Platelet-activating factor overturns the transcriptional repressor disposition of Sp1 in the expression of MMP-9 in human corneal epithelial cells. *Invest. Ophthalmol. Vis. Sci.*, **48**, 1931–1941.
93. Rothhut,B., Ghoneim,C., Antonicelli,F. and Soula-Rothhut,M. (2007) Epidermal growth factor stimulates matrix metalloproteinase-9 expression and invasion in human follicular thyroid carcinoma cells through Focal adhesion kinase. *Biochimie*, **89**, 613–624.
94. Clark,I.M., Swingler,T.E., Sampieri,C.L. and Edwards,D.R. (2008) The regulation of matrix metalloproteinases and their inhibitors. *Int J Biochem Cell Biol*, **40**, 1362–1378.
95. Lungu,G., Covalada,L., Mendes,O., Martini-Stoica,H. and Stoica,G. (2008) FGF-1-induced matrix metalloproteinase-9 expression in breast cancer cells is mediated by increased activities of NF-kappaB and activating protein-1. *Mol. Carcinog.*, **47**, 424–435.
96. Song,Y., Qian,L., Song,S., Chen,L., Zhang,Y., Yuan,G., Zhang,H., Xia,Q., Hu,M., Yu,M., et al. (2008) Fra-1 and Stat3 synergistically regulate activation of human MMP-9 gene. *Mol. Immunol.*, **45**, 137–143.
97. Kim,S.-J., Chung,Y.-K., Chung,T.-W., Kim,J.-R., Moon,S.-K., Kim,C.-H. and Park,Y.-G. (2009) Regulation of matrix metalloproteinase-9 expression between gingival fibroblast cells from old and young rats. *Biochemical and biophysical research communications*, **378**, 152–156.
98. Hasegawa,H., Senga,T., Ito,S., Iwamoto,T. and Hamaguchi,M. (2009) A role for AP-1 in matrix metalloproteinase production and invadopodia formation of v-Crk-transformed cells. *Exp Cell Res*, **315**, 1384–1392.
99. Andreucci,J.J., Grant,D., Cox,D.M., Tomc,L.K., Prywes,R., Goldhamer,D.J., Rodrigues,N., Bédard,P.-A. and McDermott,J.C. (2002) Composition and function of AP-1 transcription complexes during muscle cell differentiation. *J Biol Chem*, **277**, 16426–16432.

100. Palazzolo,M., Berthelsen,J., De Cesare,D. and Blasi,F. (2000) Oct-1 specifically binds the UEF4 site of the human AP1-regulated urokinase enhancer. *Eur. J. Biochem.*, **267**, 5427–5437.
101. Sliva,D., English,D., Lyons,D. and Lloyd,F.P. (2002) Protein kinase C induces motility of breast cancers by upregulating secretion of urokinase-type plasminogen activator through activation of AP-1 and NF-kappaB. *Biochemical and biophysical research communications*, **290**, 552–557.
102. Crippa,M.P. (2007) Urokinase-type plasminogen activator. *Int J Biochem Cell Biol*, **39**, 690–694.
103. Cirillo,G., Casalino,L., Vallone,D., Caracciolo,A., De Cesare,D. and Verde,P. (1999) Role of distinct mitogen-activated protein kinase pathways and cooperation between Ets-2, ATF-2, and Jun family members in human urokinase-type plasminogen activator gene induction by interleukin-1 and tetradecanoyl phorbol acetate. *Mol Cell Biol*, **19**, 6240–6252.
104. Peers,B., Voz,M.L., Monget,P., Mathy-Hartert,M., Berwaer,M., Belayew,A. and Martial,J.A. (1990) Regulatory elements controlling pituitary-specific expression of the human prolactin gene. *Mol Cell Biol*, **10**, 4690–4700.
105. Peers,B., Monget,P., Nalda,M.A., Voz,M.L., Berwaer,M., Belayew,A. and Martial,J.A. (1991) Transcriptional induction of the human prolactin gene by cAMP requires two cis-acting elements and at least the pituitary-specific factor Pit-1. *J Biol Chem*, **266**, 18127–18134.
106. Caccavelli,L., Manfroid,I., Martial,J.A. and Muller,M. (1998) Transcription factor AP1 is involved in basal and okadaic acid-stimulated activity of the human PRL promoter. *Mol Endocrinol*, **12**, 1215–1227.
107. Manfroid,I., Martial,J.A. and Muller,M. (2001) Inhibition of protein phosphatase PP1 in GH3B6, but not in GH3 cells, activates the MEK/ERK/c-fos pathway and the human prolactin promoter, involving the coactivator CPB/p300. *Mol Endocrinol*, **15**, 625–637.
108. Watanabe,K., Kessler,C.A., Bachurski,C.J., Kanda,Y., Richardson,B.D., Stanek,J., Handwerker,S. and Brar,A.K. (2001) Identification of a decidua-specific enhancer on the human prolactin gene with two critical activator protein 1 (AP-1) binding sites. *Mol Endocrinol*, **15**, 638–653.
109. Manfroid,I., Van de Weerd,C., Baudhuin,A., Martial,J.A. and Muller,M. (2005) EGF stimulates Pit-1 independent transcription of the human prolactin pituitary promoter in human breast cancer SK-BR-3 cells through its proximal AP-1 response element. *Molecular and Cellular Endocrinology*, **229**, 127–139.
110. Wang,D.F., Minoura,H., Sugiyama,T., Tanaka,K., Kawato,H., Toyoda,N. and Sagawa,N. (2007) Analysis on the promoter region of human decidua prolactin gene in the progesterone-induced decidualization and cAMP-induced decidualization of human endometrial stromal cells. *Mol. Cell. Biochem.*, **300**, 239–247.
111. Lee,A., Beck,L. and Markovich,D. (2003) The mouse sulfate anion transporter gene Sat1 (Slc26a1): cloning, tissue distribution, gene structure, functional

- characterization, and transcriptional regulation thyroid hormone. *DNA Cell Biol.*, **22**, 19–31.
112. Regeer,R.R., Lee,A. and Markovich,D. (2003) Characterization of the human sulfate anion transporter (hsat-1) protein and gene (SAT1; SLC26A1). *DNA Cell Biol.*, **22**, 107–117.
113. Lee,A., Dawson,P.A. and Markovich,D. (2005) NaSi-1 and Sat-1: structure, function and transcriptional regulation of two genes encoding renal proximal tubular sulfate transporters. *Int J Biochem Cell Biol*, **37**, 1350–1356.
114. Quan,T., He,T., Voorhees,J.J. and Fisher,G.J. (2005) Ultraviolet irradiation induces Smad7 via induction of transcription factor AP-1 in human skin fibroblasts. *J Biol Chem*, **280**, 8079–8085.
115. Stopa,M., Benes,V., Ansorge,W., Gressner,A.M. and Dooley,S. (2000) Genomic locus and promoter region of rat Smad7, an important antagonist of TGFbeta signaling. *Mamm Genome*, **11**, 169–176.
116. Yan,X. and Chen,Y.-G. (2011) Smad7: not only a regulator, but also a cross-talk mediator of TGF- $\beta$  signalling. *Biochem. J.*, **434**, 1–10.
117. Peinado,H., Quintanilla,M. and Cano,A. (2003) Transforming growth factor beta-1 induces snail transcription factor in epithelial cell lines: mechanisms for epithelial mesenchymal transitions. *J Biol Chem*, **278**, 21113–21123.
118. Darville,M.I., Ho,Y.S. and Eizirik,D.L. (2000) NF-kappaB is required for cytokine-induced manganese superoxide dismutase expression in insulin-producing cells. *Endocrinology*, **141**, 153–162.
119. Kaneko,M., Takahashi,T., Niinuma,Y. and Nomura,Y. (2004) Manganese superoxide dismutase is induced by endoplasmic reticulum stress through IRE1-mediated nuclear factor (NF)-kappaB and AP-1 activation. *Biol. Pharm. Bull.*, **27**, 1202–1206.
120. Kim,S.J., Denhez,F., Kim,K.Y., Holt,J.T., Sporn,M.B. and Roberts,A.B. (1989) Activation of the second promoter of the transforming growth factor-beta 1 gene by transforming growth factor-beta 1 and phorbol ester occurs through the same target sequences. *J Biol Chem*, **264**, 19373–19378.
121. Birchenall-Roberts,M.C., Ruscetti,F.W., Kasper,J., Lee,H.D., Friedman,R., Geiser,A., Sporn,M.B., Roberts,A.B. and Kim,S.J. (1990) Transcriptional regulation of the transforming growth factor beta 1 promoter by v-src gene products is mediated through the AP-1 complex. *Mol Cell Biol*, **10**, 4978–4983.
122. Boumediene,K., Felisaz,N., Bogdanowicz,P., Galera,P., Guillou,G.B. and Pujol,J.P. (1999) Avocado/soya unsaponifiables enhance the expression of transforming growth factor beta1 and beta2 in cultured articular chondrocytes. *Arthritis Rheum.*, **42**, 148–156.
123. Wilmer,W.A., Dixon,C.L., Hebert,C., Lu,L. and Rovin,B.H. (2002) PPAR-alpha ligands inhibit H2O2-mediated activation of transforming growth factor-beta1 in human mesangial cells. *Antioxid. Redox Signal.*, **4**, 877–884.

124. Shah,R., Hurley,C.K. and Posch,P.E. (2006) A molecular mechanism for the differential regulation of TGF-beta1 expression due to the common SNP -509C-T (c. -1347C > T). *Hum Genet*, **120**, 461–469.
125. Han,J.-S., Choi,B.-S., Yang,C.-W. and Kim,Y.-S. (2009) Aldosterone-induced TGF-beta1 expression is regulated by mitogen-activated protein kinases and activator protein-1 in mesangial cells. *J. Korean Med. Sci.*, **24 Suppl**, S195–203.
126. Clark,I.M., Rowan,A.D., Edwards,D.R., Bech-Hansen,T., Mann,D.A., Bahr,M.J. and Cawston,T.E. (1997) Transcriptional activity of the human tissue inhibitor of metalloproteinases 1 (TIMP-1) gene in fibroblasts involves elements in the promoter, exon 1 and intron 1. *Biochem. J.*, **324 ( Pt 2)**, 611–617.
127. Bahr,M.J., Vincent,K.J., Arthur,M.J., Fowler,A.V., Smart,D.E., Wright,M.C., Clark,I.M., Benyon,R.C., Iredale,J.P. and Mann,D.A. (1999) Control of the tissue inhibitor of metalloproteinases-1 promoter in culture-activated rat hepatic stellate cells: regulation by activator protein-1 DNA binding proteins. *Hepatology*, **29**, 839–848.
128. Wilczynska,K.M., Gopalan,S.M., Bugno,M., Kasza,A., Konik,B.S., Bryan,L., Wright,S., Griswold-Prenner,I. and Kordula,T. (2006) A novel mechanism of tissue inhibitor of metalloproteinases-1 activation by interleukin-1 in primary human astrocytes. *J Biol Chem*, **281**, 34955–34964.
129. Hammani,K., Blakis,A., Morsette,D., Bowcock,A.M., Schmutte,C., Henriot,P. and DeClerck,Y.A. (1996) Structure and characterization of the human tissue inhibitor of metalloproteinases-2 gene. *J Biol Chem*, **271**, 25498–25505.
130. Haudek,S.B., Natmessnig,B.E., Redl,H., Schlag,G. and Giroir,B.P. (1998) Genetic sequences and transcriptional regulation of the TNFA promoter: comparison of human and baboon. *Immunogenetics*, **48**, 202–207.
131. Liu,B. and Whisler,R.L. (1998) Transcriptional activation and redox regulation of the tumor necrosis factor-alpha promoter in human T cells: role of the CRE/kappa3 promoter region. *J. Interferon Cytokine Res.*, **18**, 999–1007.
132. Li,D.H., Havell,E.A., Brown,C.L. and Cullen,J.M. (2000) Woodchuck lymphotoxin-alpha, -beta and tumor necrosis factor genes: structure, characterization and biological activity. *Gene*, **242**, 295–305.
133. Sato,H., Watanabe,A., Tanaka,T., Koitabashi,N., Arai,M., Kurabayashi,M. and Yokoyama,T. (2003) Regulation of the human tumor necrosis factor-alpha promoter by angiotensin II and lipopolysaccharide in cardiac fibroblasts: different cis-acting promoter sequences and transcriptional factors. *J. Mol. Cell. Cardiol.*, **35**, 1197–1205.
134. Tsai,E.Y., Jain,J., Pesavento,P.A., Rao,A. and Goldfeld,A.E. (1996) Tumor necrosis factor alpha gene regulation in activated T cells involves ATF-2/Jun and NFATp. *Mol Cell Biol*, **16**, 459–467.
135. Tsai,E.Y., Yie,J., Thanos,D. and Goldfeld,A.E. (1996) Cell-type-specific regulation of the human tumor necrosis factor alpha gene in B cells and T cells by NFATp and ATF-2/JUN. *Mol Cell Biol*, **16**, 5232–5244.

136. Bauer, I., Sarraj, A. J., Vinson, C., Larsen, R. and Thiel, G. (2007) Interleukin-1beta and tetradecanoylphorbol acetate-induced biosynthesis of tumor necrosis factor alpha in human hepatoma cells involves the transcription factors ATF2 and c-Jun and stress-activated protein kinases. *J Cell Biochem*, **100**, 242–255.
137. Lawrence, M. C., Naziruddin, B., Levy, M. F., Jackson, A. and McGlynn, K. (2011) Calcineurin/nuclear factor of activated T cells and MAPK signaling induce TNF- $\alpha$  gene expression in pancreatic islet endocrine cells. *J Biol Chem*, **286**, 1025–1036.
138. Tischer, E., Mitchell, R., Hartman, T., Silva, M., Gospodarowicz, D., Fiddes, J. C. and Abraham, J. A. (1991) The human gene for vascular endothelial growth factor. Multiple protein forms are encoded through alternative exon splicing. *J Biol Chem*, **266**, 11947–11954.
139. Ryuto, M., Ono, M., Izumi, H., Yoshida, S., Weich, H. A., Kohno, K. and Kuwano, M. (1996) Induction of vascular endothelial growth factor by tumor necrosis factor alpha in human glioma cells. Possible roles of SP-1. *J Biol Chem*, **271**, 28220–28228.
140. Shih, S. C. and Claffey, K. P. (1998) Hypoxia-mediated regulation of gene expression in mammalian cells. *Int J Exp Pathol*, **79**, 347–357.
141. Matsushita, K., Motani, R., Sakuta, T., Nagaoka, S., Matsuyama, T., Abeyama, K., Maruyama, I., Takada, H. and Torii, M. (1999) Lipopolysaccharide enhances the production of vascular endothelial growth factor by human pulp cells in culture. *Infect. Immun.*, **67**, 1633–1639.
142. Diaz, B. V., Lenoir, M. C., Ladoux, A., Frelin, C., Démarchez, M. and Michel, S. (2000) Regulation of vascular endothelial growth factor expression in human keratinocytes by retinoids. *J Biol Chem*, **275**, 642–650.
143. Hossain, M. A., Bouton, C. M., Pevsner, J. and Laterra, J. (2000) Induction of vascular endothelial growth factor in human astrocytes by lead. Involvement of a protein kinase C/activator protein-1 complex-dependent and hypoxia-inducible factor 1-independent signaling pathway. *J Biol Chem*, **275**, 27874–27882.
144. Kuwano, M., Fukushi, J., Okamoto, M., Nishie, A., Goto, H., Ishibashi, T. and Ono, M. (2001) Angiogenesis factors. *Intern. Med.*, **40**, 565–572.
145. Pollmann, C., Huang, X., Mall, J., Bech-Otschir, D., Naumann, M. and Dubiel, W. (2001) The constitutive photomorphogenesis 9 signalosome directs vascular endothelial growth factor production in tumor cells. *Cancer Res*, **61**, 8416–8421.
146. Cho, M.-L., Cho, C.-S., Min, S.-Y., Kim, S.-H., Lee, S.-S., Kim, W.-U., Min, D.-J., Min, J.-K., Youn, J., Hwang, S.-Y., et al. (2002) Cyclosporine inhibition of vascular endothelial growth factor production in rheumatoid synovial fibroblasts. *Arthritis Rheum.*, **46**, 1202–1209.
147. Papaioannou, A. I., Kostikas, K., Kollia, P. and Gourgoulis, K. I. (2006) Clinical implications for vascular endothelial growth factor in the lung: friend or foe? *Respir. Res.*, **7**, 128.

148. Pouyssegur,J., Dayan,F. and Mazure,N.M. (2006) Hypoxia signalling in cancer and approaches to enforce tumour regression. *Nature*, **441**, 437–443.
149. Makinde,T., Murphy,R.F. and Agrawal,D.K. (2006) Immunomodulatory role of vascular endothelial growth factor and angiopoietin-1 in airway remodeling. *Curr. Mol. Med.*, **6**, 831–841.
150. Ming,J., Zhang,Q., Qiu,X. and Wang,E. (2009) Interleukin 7/interleukin 7 receptor induce c-Fos/c-Jun-dependent vascular endothelial growth factor-D up-regulation: a mechanism of lymphangiogenesis in lung cancer. *Eur J Cancer*, **45**, 866–873.
151. Hay,N., Takimoto,M. and Bishop,J.M. (1989) A FOS protein is present in a complex that binds a negative regulator of MYC. *Genes Dev*, **3**, 293–303.
152. Takimoto,M., Quinn,J.P., Farina,A.R., Staudt,L.M. and Levens,D. (1989) fos/jun and octamer-binding protein interact with a common site in a negative element of the human c-myc gene. *J Biol Chem*, **264**, 8992–8999.
153. Li,L., Chambard,J.C., Karin,M. and Olson,E.N. (1992) Fos and Jun repress transcriptional activation by myogenin and MyoD: the amino terminus of Jun can mediate repression. *Genes Dev*, **6**, 676–689.
154. Angel,P., Imagawa,M., Chiu,R., Stein,B., Imbra,R.J., Rahmsdorf,H.J., Jonat,C., Herrlich,P. and Karin,M. (1987) Phorbol ester-inducible genes contain a common cis element recognized by a TPA-modulated trans-acting factor. *Cell*, **49**, 729–739.
155. Delhase,M., Castrillo,J.L., la Hoya,de,M., Rajas,F. and Hooghe-Peters,E.L. (1996) AP-1 and Oct-1 transcription factors down-regulate the expression of the human PIT1/GHF1 gene. *J Biol Chem*, **271**, 32349–32358.
156. Petz,L.N., Ziegler,Y.S., Schultz,J.R. and Nardulli,A.M. (2004) Fos and Jun inhibit estrogen-induced transcription of the human progesterone receptor gene through an activator protein-1 site. *Mol Endocrinol*, **18**, 521–532.
157. Karpurapu,M., Wang,D., Van Quyen,D., Kim,T.-K., Kundumani-Sridharan,V., Pulusani,S. and Rao,G.N. (2010) Cyclin D1 is a bona fide target gene of NFATc1 and is sufficient in the mediation of injury-induced vascular wall remodeling. *J Biol Chem*, **285**, 3510–3523.
158. Meyyappan,M., Wheaton,K. and Riabowol,K.T. (1999) Decreased expression and activity of the immediate-early growth response (Egr-1) gene product during cellular senescence. *J Cell Physiol*, **179**, 29–39.
159. Shen,F., Hu,Z., Goswami,J. and Gaffen,S.L. (2006) Identification of common transcriptional regulatory elements in interleukin-17 target genes. *J Biol Chem*, **281**, 24138–24148.
160. Dong,L.-Y., Wang,X.-N., Song,Z.-G., Guo,D., Zhao,Y.-Y. and An,W. (2007) Identification of human hepatic stimulator substance gene promoter and demonstration of dual regulation of AP1/AP4 cis-acting element in different cell lines. *Int J Biochem Cell Biol*, **39**, 181–196.

161. Powell, J.D., Lerner, C.G., Ewoldt, G.R. and Schwartz, R.H. (1999) The -180 site of the IL-2 promoter is the target of CREB/CREM binding in T cell anergy. *J. Immunol.*, **163**, 6631–6639.
162. Li-Weber, M., Salgame, P., Hu, C. and Krammer, P.H. (1997) Characterization of constitutive and inducible transcription factors binding to the P2 NF-AT site in the human interleukin-4 promoter. *Gene*, **188**, 253–260.
163. Thomas, M.A., Mordvinov, V.A. and Sanderson, C.J. (1999) The activity of the human interleukin-5 conserved lymphokine element 0 is regulated by octamer factors in human cells. *Eur. J. Biochem.*, **265**, 300–307.
164. Mahatan, C.S., Kaestner, K.H., Geiman, D.E. and Yang, V.W. (1999) Characterization of the structure and regulation of the murine gene encoding gut-enriched Krüppel-like factor (Krüppel-like factor 4). *Nucleic Acids Res*, **27**, 4562–4569.
165. Mookherjee, N., Hamill, P., Gardy, J., Blimkie, D., Falsafi, R., Chikatamarla, A., Arenillas, D.J., Doria, S., Kollmann, T.R. and Hancock, R.E.W. (2009) Systems biology evaluation of immune responses induced by human host defence peptide LL-37 in mononuclear cells. *Mol Biosyst*, **5**, 483–496.
166. Flick, M.B., Sapi, E. and Kacinski, B.M. (2002) Hormonal regulation of the c-fms proto-oncogene in breast cancer cells is mediated by a composite glucocorticoid response element. *J Cell Biochem*, **85**, 10–23.
167. Wei, H., Wang, C., Zhang, C., Li, P., Wang, F. and Zhang, Z. (2010) Comparative profiling of microRNA expression between neural stem cells and motor neurons in embryonic spinal cord in rat. *Int. J. Dev. Neurosci.*, **28**, 545–551.
168. Chang, H.W., Lai, Y.C., Cheng, C.Y., Ho, J.L., Ding, S.T. and Liu, Y.C. (1999) UV inducibility of rat proliferating cell nuclear antigen gene promoter. *J Cell Biochem*, **73**, 423–432.
169. Poloumienko, A., Coté, A., Quee, A.T.T., Zhu, L. and Bakovic, M. (2004) Genomic organization and differential splicing of the mouse and human Pcyt2 genes. *Gene*, **325**, 145–155.
170. Amin, S., Kumar, A., Nilchi, L., Wright, K. and Kozlowski, M. (2011) Breast cancer cells proliferation is regulated by tyrosine phosphatase SHP1 through c-jun N-terminal kinase and cooperative induction of RFX-1 and AP-4 transcription factors. *Mol Cancer Res*, **9**, 1112–1125.
171. Desiderio, M.A., Pogliaghi, G. and Dansi, P. (1998) Regulation of spermidine/spermine N1-acetyltransferase expression by cytokines and polyamines in human hepatocarcinoma cells (HepG2). *J Cell Physiol*, **174**, 125–134.
172. Babbar, N., Ignatenko, N.A., Casero, R.A. and Gerner, E.W. (2003) Cyclooxygenase-independent induction of apoptosis by sulindac sulfone is mediated by polyamines in colon cancer. *J Biol Chem*, **278**, 47762–47775.
173. Shingu, T. and Bornstein, P. (1994) Overlapping Egr-1 and Sp1 sites function in the regulation of transcription of the mouse thrombospondin 1 gene. *J Biol Chem*, **269**, 32551–32557.



174. Greco,A., Villa,R. and Pierotti,M.A. (1996) Genomic organization of the human NTRK1 gene. *Oncogene*, **13**, 2463–2466.
175. Viré,E., Brenner,C., Deplus,R., Blanchon,L., Fraga,M., Didelot,C., Morey,L., Van Eynde,A., Bernard,D., Vanderwinden,J.-M., et al. (2006) The Polycomb group protein EZH2 directly controls DNA methylation. *Nature*, **439**, 871–874.
176. Bracken,A.P. and Helin,K. (2009) Polycomb group proteins: navigators of lineage pathways led astray in cancer. *Nat Rev Cancer*, **9**, 773–784.
177. Xu,B., Zeng,D.-Q., Wu,Y., Zheng,R., Gu,L., Lin,X., Hua,X. and Jin,G.-H. (2011) Tumor suppressor menin represses paired box gene 2 expression via Wilms tumor suppressor protein-polycomb group complex. *J Biol Chem*, **286**, 13937–13944.
178. Palakurthy,R.K., Wajapeyee,N., Santra,M.K., Gazin,C., Lin,L., Gobeil,S. and Green,M.R. (2009) Epigenetic silencing of the RASSF1A tumor suppressor gene through HOXB3-mediated induction of DNMT3B expression. *Molecular Cell*, **36**, 219–230.
179. Shi,B., Liang,J., Yang,X., Wang,Y., Zhao,Y., Wu,H., Sun,L., Zhang,Y., Chen,Y., Li,R., et al. (2007) Integration of estrogen and Wnt signaling circuits by the polycomb group protein EZH2 in breast cancer cells. *Mol Cell Biol*, **27**, 5105–5119.
180. Blais,A., van Oevelen,C.J.C., Margueron,R., Acosta-Alvear,D. and Dynlacht,B.D. (2007) Retinoblastoma tumor suppressor protein-dependent methylation of histone H3 lysine 27 is associated with irreversible cell cycle exit. *J. Cell Biol.*, **179**, 1399–1412.
181. Squazzo,S.L., O'Geen,H., Komashko,V.M., Krig,S.R., Jin,V.X., Jang,S.-W., Margueron,R., Reinberg,D., Green,R. and Farnham,P.J. (2006) Suz12 binds to silenced regions of the genome in a cell-type-specific manner. *Genome Res*, **16**, 890–900.
182. Pasini,D., Bracken,A.P., Hansen,J.B., Capillo,M. and Helin,K. (2007) The polycomb group protein Suz12 is required for embryonic stem cell differentiation. *Mol Cell Biol*, **27**, 3769–3779.
183. Landeira,D., Sauer,S., Poot,R., Dvorkina,M., Mazzarella,L., Jørgensen,H.F., Pereira,C.F., Leleu,M., Piccolo,F.M., Spivakov,M., et al. (2010) Jarid2 is a PRC2 component in embryonic stem cells required for multi-lineage differentiation and recruitment of PRC1 and RNA Polymerase II to developmental regulators. *Nat Cell Biol*, **12**, 618–624.
184. Suvà,M.-L., Riggi,N., Janiszewska,M., Radovanovic,I., Provero,P., Stehle,J.-C., Baumer,K., Le Bitoux,M.-A., Marino,D., Cironi,L., et al. (2009) EZH2 is essential for glioblastoma cancer stem cell maintenance. *Cancer research*, **69**, 9211–9218.
185. Ku,M., Koche,R.P., Rheinbay,E., Mendenhall,E.M., Endoh,M., Mikkelsen,T.S., Presser,A., Nusbaum,C., Xie,X., Chi,A.S., et al. (2008) Genomewide analysis of PRC1 and PRC2 occupancy identifies two classes of bivalent domains. *PLoS Genet*, **4**, e1000242.

186. Lee, J., Son, M.J., Woolard, K., Donin, N.M., Li, A., Cheng, C.H., Kotliarova, S., Kotliarov, Y., Walling, J., Ahn, S., et al. (2008) Epigenetic-mediated dysfunction of the bone morphogenetic protein pathway inhibits differentiation of glioblastoma-initiating cells. *Cancer Cell*, **13**, 69–80.
187. Ko, C.-Y., Hsu, H.-C., Shen, M.-R., Chang, W.-C. and Wang, J.-M. (2008) Epigenetic silencing of CCAAT/enhancer-binding protein delta activity by YY1/polycomb group/DNA methyltransferase complex. *J Biol Chem*, **283**, 30919–30932.
188. Holling, T.M., Bergevoet, M.W.T., Wilson, L., Van Eggermond, M.C.J.A., Schooten, E., Steenbergen, R.D.M., Snijders, P.J.F., Jager, M.J. and Van den Elsen, P.J. (2007) A role for EZH2 in silencing of IFN-gamma inducible MHC2TA transcription in uveal melanoma. *J. Immunol.*, **179**, 5317–5325.
189. Lee, E.R., Murdoch, F.E. and Fritsch, M.K. (2007) High histone acetylation and decreased polycomb repressive complex 2 member levels regulate gene specific transcriptional changes during early embryonic stem cell differentiation induced by retinoic acid. *Stem Cells*, **25**, 2191–2199.
190. Hussain, M., Rao, M., Humphries, A.E., Hong, J.A., Liu, F., Yang, M., Caragacianu, D. and Schrupp, D.S. (2009) Tobacco smoke induces polycomb-mediated repression of Dickkopf-1 in lung cancer cells. *Cancer research*, **69**, 3570–3578.
191. Cheng, A.S.L., Lau, S.S., Chen, Y., Kondo, Y., Li, M.S., Feng, H., Ching, A.K., Cheung, K.F., Wong, H.K., Tong, J.H., et al. (2011) EZH2-mediated concordant repression of Wnt antagonists promotes  $\beta$ -catenin-dependent hepatocarcinogenesis. *Cancer research*, **71**, 4028–4039.
192. Wang, L., Jin, Q., Lee, J.-E., Su, I.-H. and Ge, K. (2010) Histone H3K27 methyltransferase Ezh2 represses Wnt genes to facilitate adipogenesis. *Proc Natl Acad Sci USA*, **107**, 7317–7322.
193. Koyanagi, M., Baguet, A., Martens, J., Margueron, R., Jenuwein, T. and Bix, M. (2005) EZH2 and histone 3 trimethyl lysine 27 associated with Il4 and Il13 gene silencing in Th1 cells. *J Biol Chem*, **280**, 31470–31477.
194. Jacob, E., Hod-Dvorai, R., Schif-Zuck, S. and Avni, O. (2008) Unconventional association of the polycomb group proteins with cytokine genes in differentiated T helper cells. *J Biol Chem*, **283**, 13471–13481.
195. Villasante, A., Piazzolla, D., Li, H., Gomez-Lopez, G., Djabali, M. and Serrano, M. (2011) Epigenetic regulation of Nanog expression by Ezh2 in pluripotent stem cells. *Cell Cycle*, **10**, 1488–1498.
196. Margueron, R., Li, G., Sarma, K., Blais, A., Zavadil, J., Woodcock, C.L., Dynlacht, B.D. and Reinberg, D. (2008) Ezh1 and Ezh2 maintain repressive chromatin through different mechanisms. *Molecular Cell*, **32**, 503–518.
197. Bracken, A.P., Kleine-Kohlbrecher, D., Dietrich, N., Pasini, D., Gargiulo, G., Beekman, C., Theilgaard-Mönch, K., Minucci, S., Porse, B.T., Marine, J.-C., et al. (2007) The Polycomb group proteins bind throughout the INK4A-ARF locus and are disassociated in senescent cells. *Genes Dev*, **21**, 525–530.

198. Chen,H., Gu,X., Su,I.-H., Bottino,R., Contreras,J.L., Tarakhovsky,A. and Kim,S.K. (2009) Polycomb protein Ezh2 regulates pancreatic beta-cell Ink4a/Arf expression and regeneration in diabetes mellitus. *Genes & Development*, **23**, 975–985.
199. Agherbi,H., Gaussmann-Wenger,A., Verthuy,C., Chasson,L., Serrano,M. and Djabali,M. (2009) Polycomb mediated epigenetic silencing and replication timing at the INK4a/ARF locus during senescence. *PLoS ONE*, **4**, e5622.
200. Testoni,B., Schinzari,V., Guerrieri,F., Gerbal-Chaloin,S., Blandino,G. and Levrero,M. (2011) p53-paralog DNp73 oncogene is repressed by IFN $\alpha$ /STAT2 through the recruitment of the Ezh2 polycomb group transcriptional repressor. *Oncogene*, **30**, 2670–2678.
201. Kondo,Y., Shen,L., Cheng,A.S., Ahmed,S., Bumber,Y., Charo,C., Yamochi,T., Urano,T., Furukawa,K., Kwabi-Addo,B., et al. (2008) Gene silencing in cancer by histone H3 lysine 27 trimethylation independent of promoter DNA methylation. *Nat Genet*, **40**, 741–750.
202. Song,L.-B., Li,J., Liao,W.-T., Feng,Y., Yu,C.-P., Hu,L.-J., Kong,Q.-L., Xu,L.-H., Zhang,X., Liu,W.-L., et al. (2009) The polycomb group protein Bmi-1 represses the tumor suppressor PTEN and induces epithelial-mesenchymal transition in human nasopharyngeal epithelial cells. *J. Clin. Invest.*, **119**, 3626–3636.
203. Yoshimi,A., Goyama,S., Watanabe-Okochi,N., Yoshiki,Y., Nannya,Y., Nitta,E., Arai,S., Sato,T., Shimabe,M., Nakagawa,M., et al. (2011) Evi1 represses PTEN expression and activates PI3K/AKT/mTOR via interactions with polycomb proteins. *Blood*, **117**, 3617–3628.
204. Fujii,S., Ito,K., Ito,Y. and Ochiai,A. (2008) Enhancer of zeste homologue 2 (EZH2) down-regulates RUNX3 by increasing histone H3 methylation. *J Biol Chem*, **283**, 17324–17332.
205. Chuang,L.S.H. and Ito,Y. (2010) RUNX3 is multifunctional in carcinogenesis of multiple solid tumors. *Oncogene*, **29**, 2605–2615.
206. Yu,J., Yu,J., Rhodes,D.R., Tomlins,S.A., Cao,X., Chen,G., Mehra,R., Wang,X., Ghosh,D., Shah,R.B., et al. (2007) A polycomb repression signature in metastatic prostate cancer predicts cancer outcome. *Cancer research*, **67**, 10657–10663.
